# Supplementary material for: A Unique and Stable Polyproline I Helix Sorted out from Conformational Equilibrium by Solvent Polarity
Source: PubMed Central journal article supplement (PMC9639007; doi:10.1021/acs.joc.2c01377), 2022-10-15
Supplement: jo2c01377_si_001.pdf [file jo2c01377_si_001.pdf]

# SUPPORTING INFORMATION

## A unique and stable Polyproline I helix sorted out from conformational equilibrium by solvent polarity

Matteo Pollastrini, Luca Pasquinelli, Marcin Górecki, Federica Balzano, Lorenzo Cupellini, Filippo Lipparini, Gloria Uccello Barretta, Fabio Marchetti, Gennaro Pescitelli\*, Gaetano Angelici\*

Dipartimento di Chimica e Chimica Industriale, Università di Pisa, Via G. Moruzzi 13, 56124 Pisa, Italy  
Institute of Organic Chemistry, Polish Academy of Sciences, ul. Kasprzaka 44/52, 01-224 Warsaw, Poland

\* Email: gennaro.pescitelli@unipi.it

\* Email: gaetano.angelici@unipi.it

KEYWORDS "Polyproline I, foldamers, proline mimetic, conformational studies"

### Contents

|                                                                                                                                                       |      |
|-------------------------------------------------------------------------------------------------------------------------------------------------------|------|
| <sup>1</sup> H NMR spectrum of Boc-(2 <i>S</i> )-Ind-OMe ( <b>1</b> ) in CDCl <sub>3</sub> (0.1 M) at 500 MHz .....                                   | SI3  |
| <sup>1</sup> H NMR spectrum of Boc-(2 <i>S</i> )-Ind-OMe ( <b>1</b> ) in DMSO- <i>d</i> <sub>6</sub> (0.1 M) at 500 MHz .....                         | SI4  |
| <sup>13</sup> C{ <sup>1</sup> H}NMR spectrum of Boc-(2 <i>S</i> )-Ind-OMe ( <b>1</b> ) in DMSO- <i>d</i> <sub>6</sub> at 125 MHz .....                | SI5  |
| <sup>1</sup> H NMR spectrum of Boc-((2 <i>S</i> )-Ind) <sub>2</sub> -OMe ( <b>2</b> ) in CDCl <sub>3</sub> (0.1 M) at 500 MHz .....                   | SI6  |
| <sup>1</sup> H NMR spectrum of Boc-((2 <i>S</i> )-Ind) <sub>2</sub> -OMe ( <b>2</b> ) in DMSO- <i>d</i> <sub>6</sub> (0.1 M) at 500 MHz .....         | SI7  |
| <sup>13</sup> C{ <sup>1</sup> H}NMR spectrum of Boc-((2 <i>S</i> )-Ind) <sub>2</sub> -OMe ( <b>2</b> ) in DMSO- <i>d</i> <sub>6</sub> at 150 MHz..... | SI8  |
| <sup>1</sup> H NMR spectrum of Boc-((2 <i>S</i> )-Ind) <sub>3</sub> -OMe ( <b>3</b> ) in CDCl <sub>3</sub> (0.1 M) at 500 MHz .....                   | SI9  |
| <sup>1</sup> H NMR spectrum of Boc-((2 <i>S</i> )-Ind) <sub>3</sub> -OMe ( <b>3</b> ) in DMSO- <i>d</i> <sub>6</sub> (0.1 M) at 500 MHz .....         | SI10 |
| <sup>13</sup> C{ <sup>1</sup> H}NMR spectrum of Boc-((2 <i>S</i> )-Ind) <sub>3</sub> -OMe ( <b>3</b> ) in DMSO- <i>d</i> <sub>6</sub> at 125 MHz..... | SI11 |
| <sup>1</sup> H NMR spectrum of Boc-((2 <i>S</i> )-Ind) <sub>4</sub> -OMe ( <b>4</b> ) in CDCl <sub>3</sub> (0.1 M) at 500 MHz .....                   | SI12 |
| <sup>1</sup> H NMR spectrum of Boc-((2 <i>S</i> )-Ind) <sub>4</sub> -OMe ( <b>4</b> ) in DMSO- <i>d</i> <sub>6</sub> (0.1 M) at 500 MHz .....         | SI13 |
| <sup>13</sup> C{ <sup>1</sup> H}NMR spectrum of Boc-((2 <i>S</i> )-Ind) <sub>4</sub> -OMe ( <b>4</b> ) in DMSO- <i>d</i> <sub>6</sub> at 150 MHz..... | SI14 |
| 2D HSQC (600 MHz, DMSO- <i>d</i> <sub>6</sub> , 10 mM, 25 °C) map of Boc-((2 <i>S</i> )-Ind) <sub>4</sub> -OMe ( <b>4</b> ).....                      | SI15 |
| 2D ROESY (600 MHz, DMSO- <i>d</i> <sub>6</sub> , 10 mM, 25 °C, mix 0.6 s) map of Boc-((2 <i>S</i> )-Ind) <sub>4</sub> -OMe ( <b>4</b> ) .....         | SI16 |
| 2D COSY (600 MHz, DMSO- <i>d</i> <sub>6</sub> , 10 mM, 25 °C) map of Boc-((2 <i>S</i> )-Ind) <sub>4</sub> -OMe ( <b>4</b> ) .....                     | SI17 |
| 2D TOCSY (600 MHz, DMSO- <i>d</i> <sub>6</sub> , 10 mM, 25 °C) map of Boc-((2 <i>S</i> )-Ind) <sub>4</sub> -OMe ( <b>4</b> ) .....                    | SI18 |
| HPLC-MS analysis of ( <b>1</b> ).....                                                                                                                 | SI19 |
| HPLC-MS analysis of ( <b>2</b> ).....                                                                                                                 | SI20 |
| HPLC-MS analysis of ( <b>3</b> ).....                                                                                                                 | SI21 |
| HPLC-MS analysis of ( <b>4</b> ).....                                                                                                                 | SI22 |

|                                                                                                                                                                                                                        |      |
|------------------------------------------------------------------------------------------------------------------------------------------------------------------------------------------------------------------------|------|
| <b>Table S1.</b> Crystal data and structure refinement of <b>(4)</b> .....                                                                                                                                             | SI23 |
| <b>Table S2.</b> Description of main C–H···O interactions .....                                                                                                                                                        | SI24 |
| <b>Table S3.</b> Calculated energy differences between conformers.....                                                                                                                                                 | SI25 |
| Torsional parameters.....                                                                                                                                                                                              | SI26 |
| <b>Table S4.</b> Calculated ROE distances along the PBMetaD in DMSO .....                                                                                                                                              | SI27 |
| <b>Figure S1.</b> Intra-unit Ha-Hb(cis) and inter-unit Ha-Hb'(trans) ROE interactions of <b>4</b> shown on the DFT-optimized X-ray structure. ....                                                                     | SI28 |
| <b>Figure S2.</b> Experimental absorption spectra measured for compounds 1-4 in different solvents....                                                                                                                 | SI29 |
| <b>Figure S3.</b> Variable-temperature ECD spectra of <b>4</b> measured in MeCN.....                                                                                                                                   | SI30 |
| <b>Figure S4.</b> Absorption and ECD spectra of <b>4</b> measured in TFE. ....                                                                                                                                         | SI31 |
| <b>Figure S5.</b> IR (bottom) and VCD (top) spectra of <b>2</b> measured in different solvents.....                                                                                                                    | SI32 |
| <b>Figure S6.</b> IR (bottom) and VCD (top) spectra of <b>3</b> measured in different solvents.....                                                                                                                    | SI33 |
| <b>Figure S7.</b> Expansion of the VCD spectrum of <b>(4)</b> calculated at B3LYP/6-311+G(d,p)/PCM level using the DFT-optimized X-ray structure. ....                                                                 | SI34 |
| <b>Figure S8.</b> Calculated ECD spectra for <b>4</b> at TD-CAM-B3LYP/def2-SVP and at TD-CAM-B3LYP/def2-TZVP level using the structure obtained starting from the X-ray geometry.....                                  | SI35 |
| <b>Figure S9.</b> Calculated ECD spectra for <b>4</b> at TD-CAM-B3LYP/def2-SVP/PCM for MeOH level using the structures obtained starting from the X-ray geometry and MD simulations. ....                              | SI36 |
| <b>Figure S10.</b> Calculated ECD spectra for <b>4</b> at TD-B3LYP/def2-SVP level in vacuum and with PCM solvent model for MeOH using the structures obtained starting from the X-ray geometry and MD simulations..... | SI37 |
| <b>Figure S11.</b> Calculated ECD spectrum (TD-CAM-B3LYP/def2-SVP/PCM for MeCN) using the MD-derived structure with band assignment.....                                                                               | SI38 |
| <b>Figure S12.</b> View of the molecular structure of <b>(4)</b> . Ellipsoids are represented at 20% probability.                                                                                                      | SI39 |
| <b>Coordinates of the DFT-optimized geometries</b> .....                                                                                                                                                               | SI40 |
| <b>Structures and energies of the optimized clusters</b> .....                                                                                                                                                         | SI44 |

$^1\text{H}$  NMR spectrum of Boc-(2S)-Ind-OMe (**1**) in  $\text{CDCl}_3$  (0.1 M) at 500 MHz

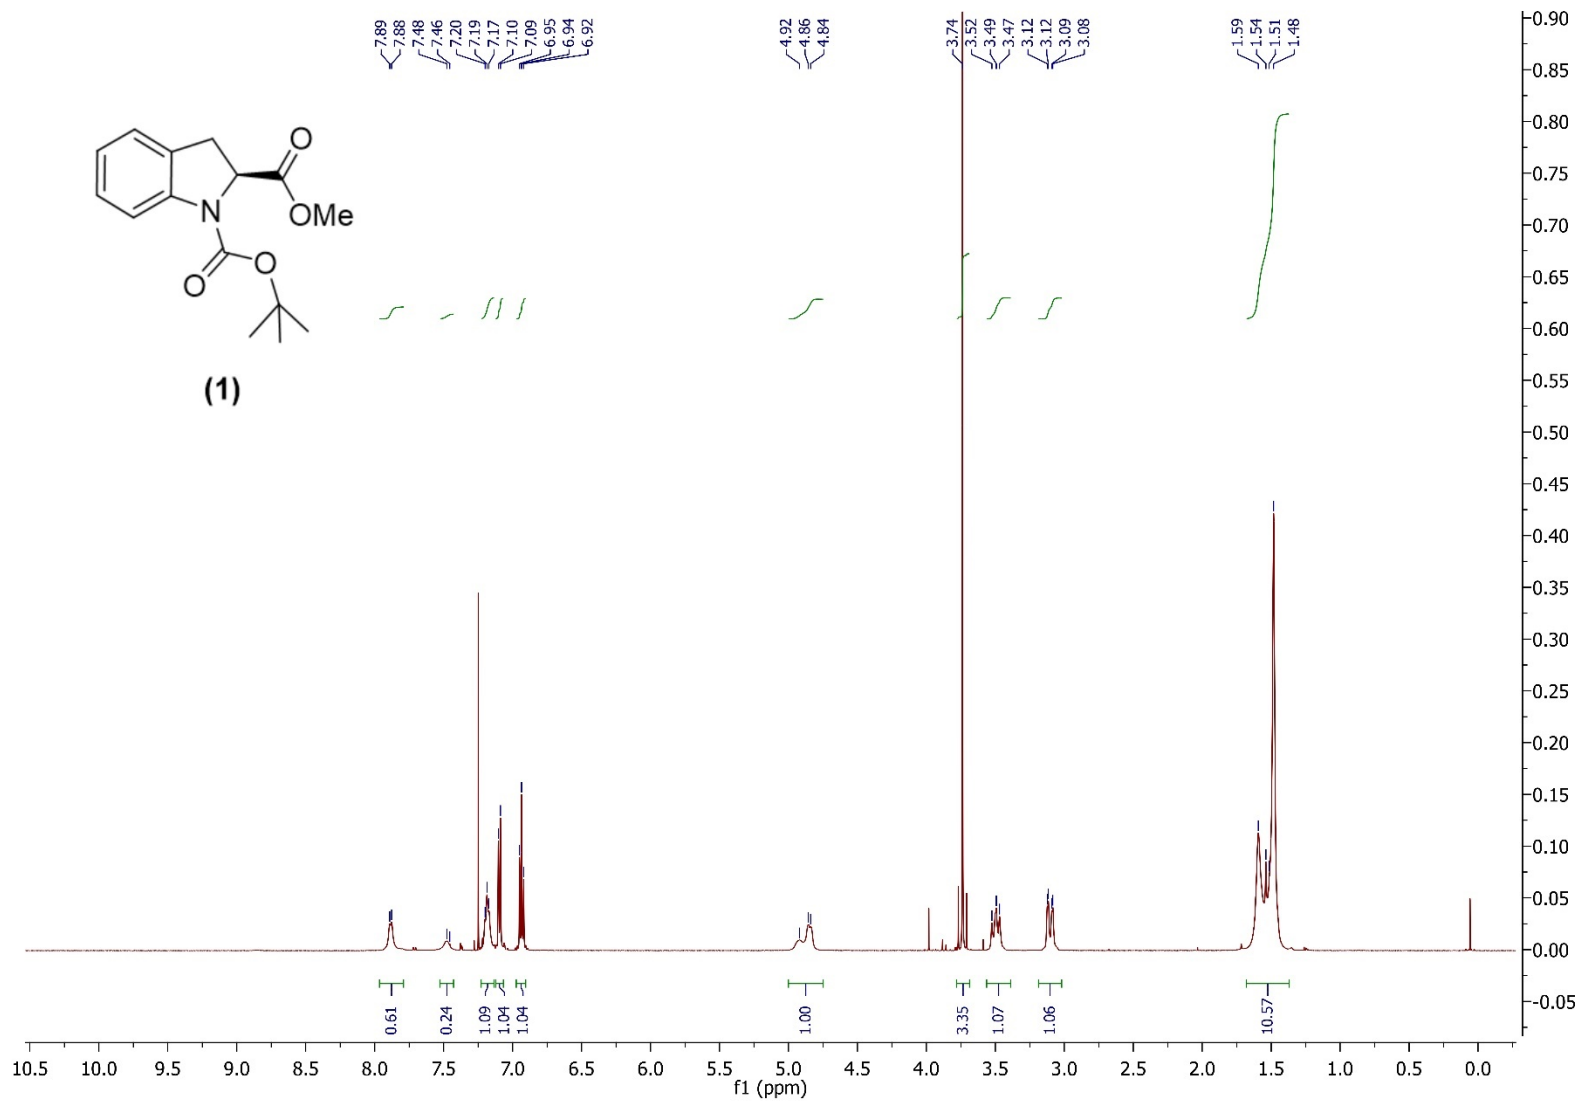

$^1\text{H}$  NMR spectrum of Boc-(2*S*)-Ind-OMe (**1**) in  $\text{DMSO-}d_6$  (0.1 M) at 500 MHz

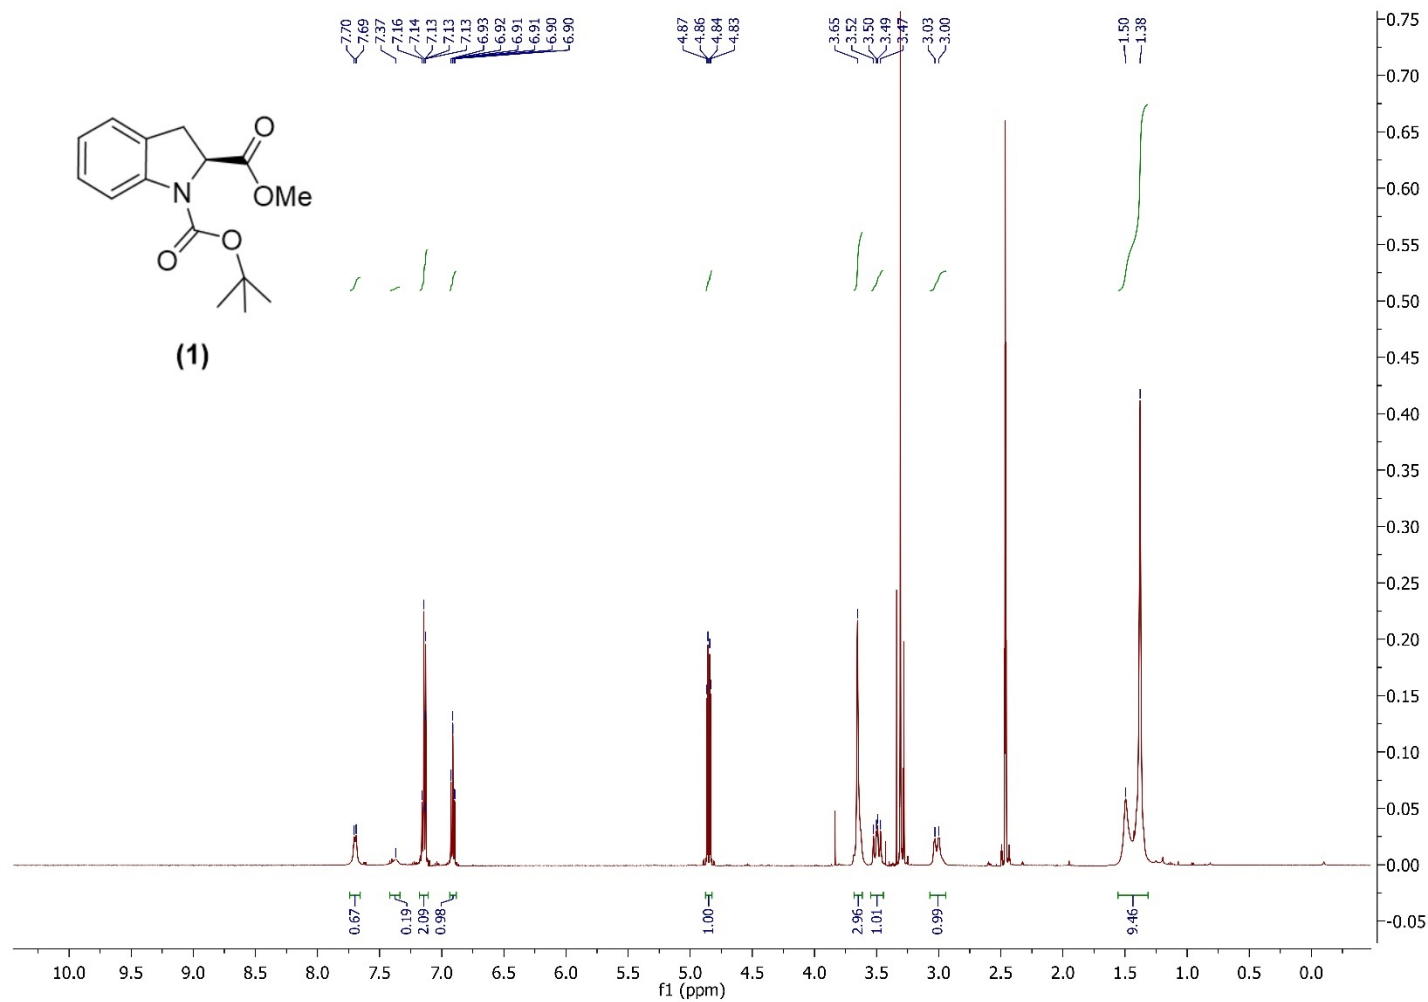

$^{13}\text{C}\{^1\text{H}\}$ NMR spectrum of Boc-(2*S*)-Ind-OMe (**1**) in  $\text{DMSO-}d_6$  at 125 MHz

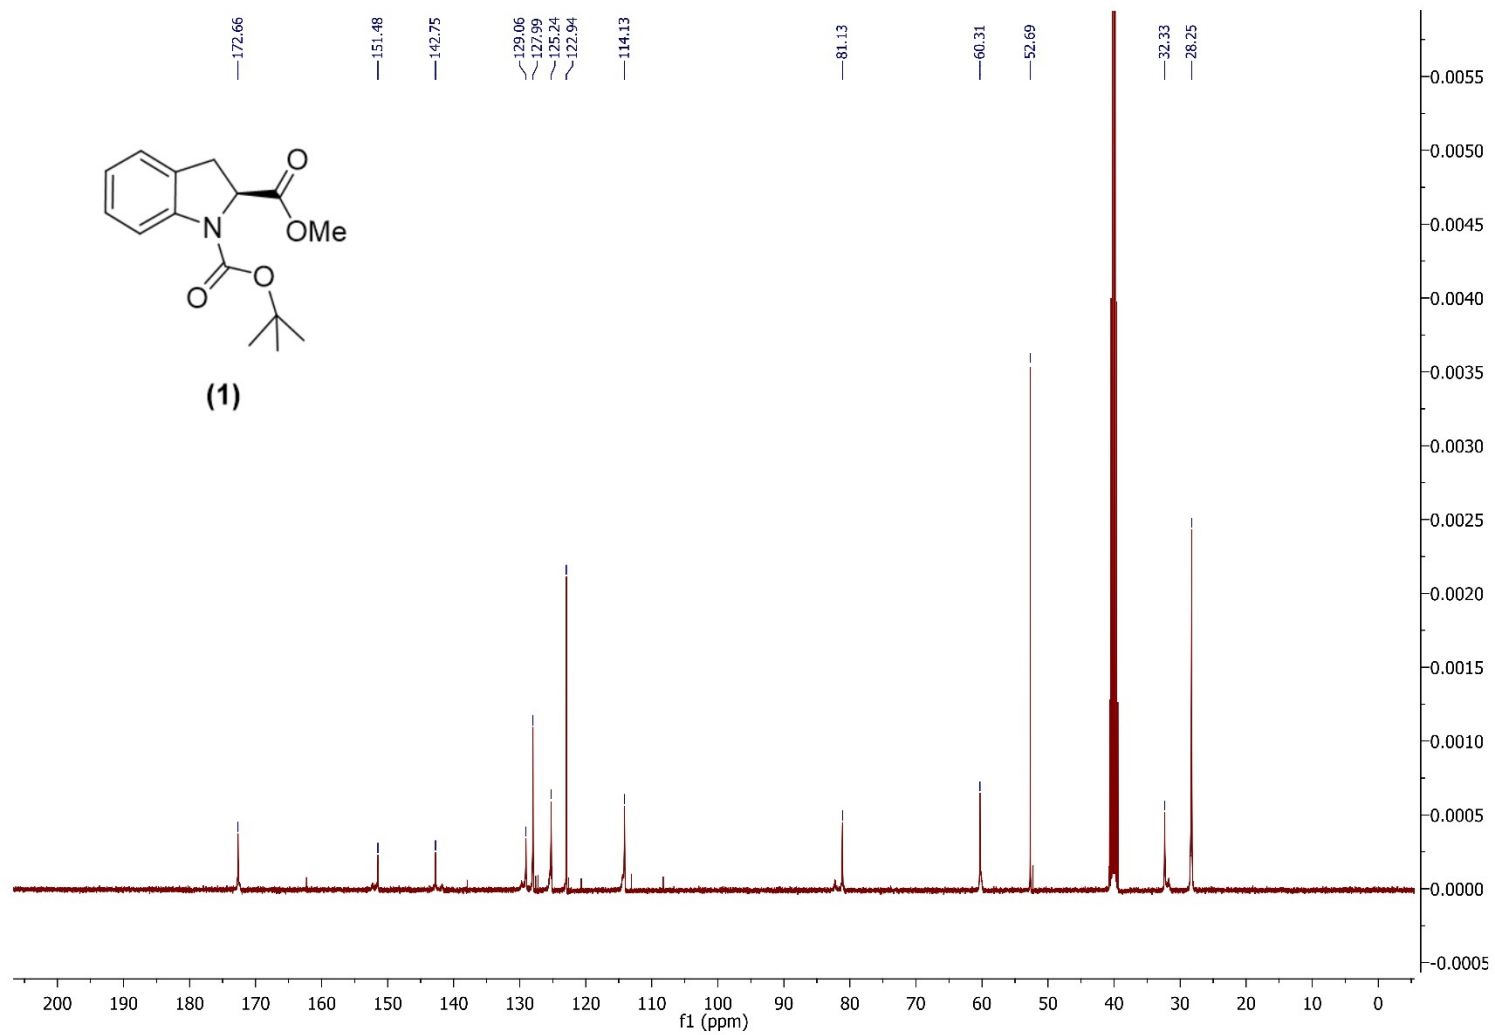



$^1\text{H}$  NMR spectrum of Boc-((2S)-Ind) $_2$ -OMe (2) in DMSO- $d_6$  (0.1 M) at 500 MHz

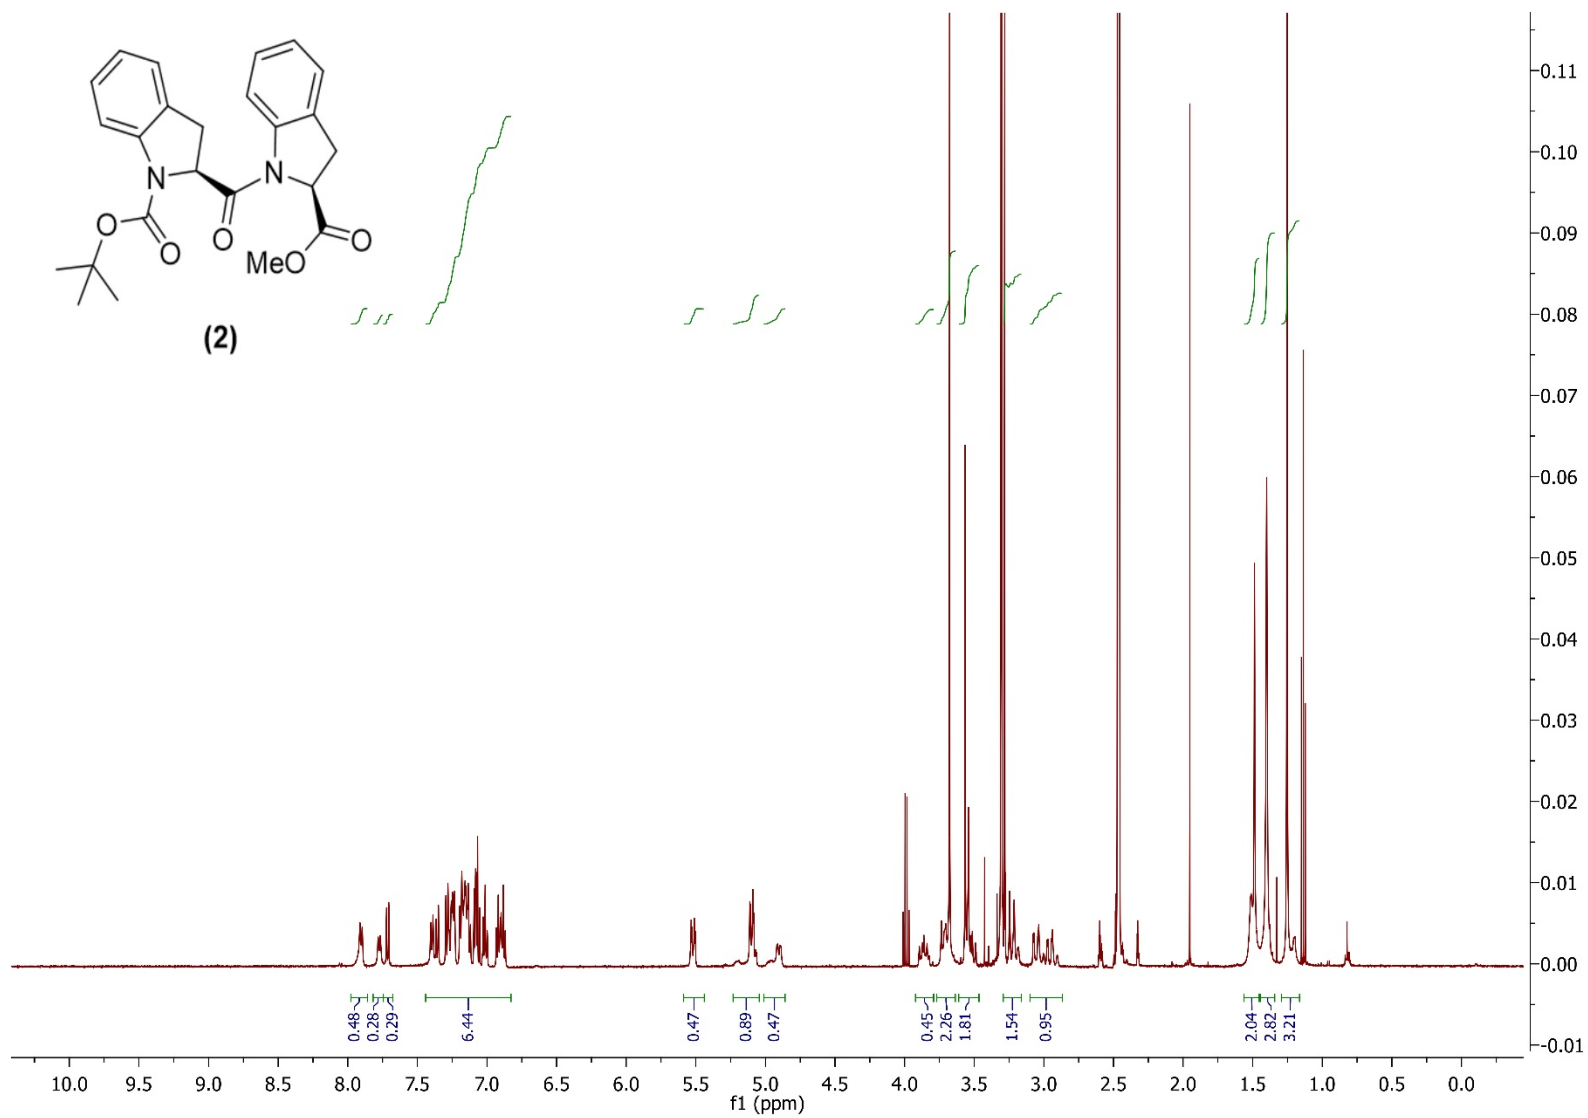

$^{13}\text{C}\{^1\text{H}\}$ NMR spectrum of Boc-((2*S*)-Ind)<sub>2</sub>-OMe (**2**) in DMSO-*d*<sub>6</sub> at 150 MHz

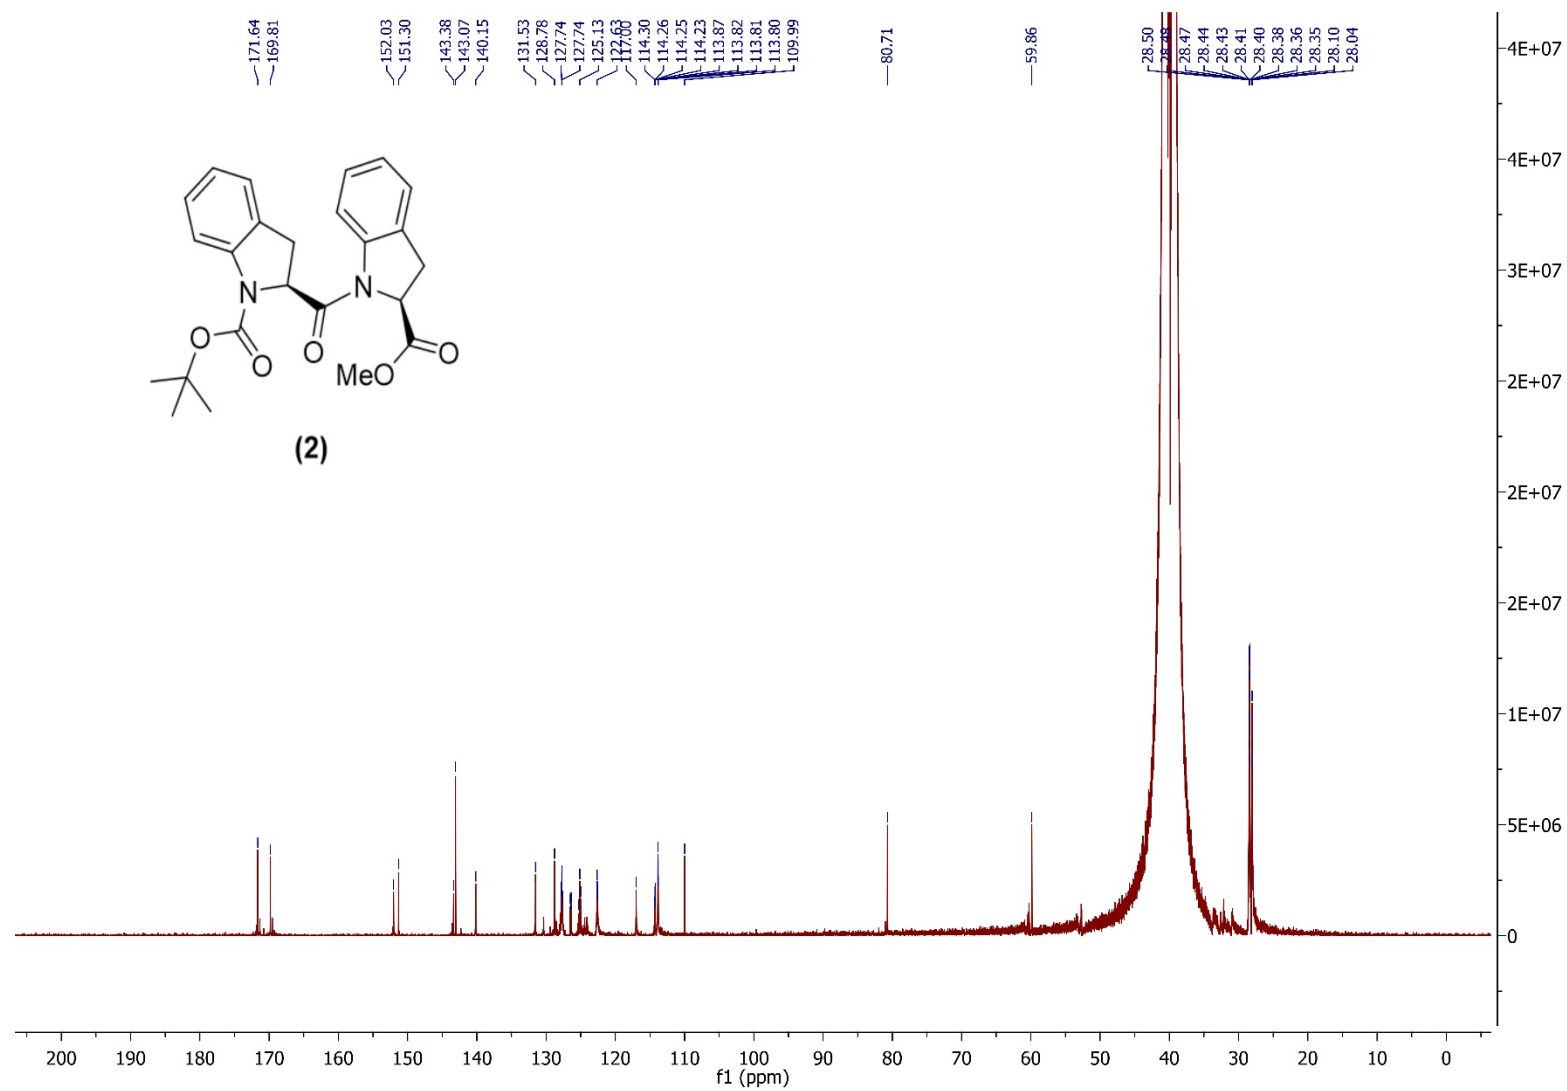



$^1\text{H}$  NMR spectrum of Boc-((2*S*)-Ind)<sub>3</sub>-OMe (**3**) in CDCl<sub>3</sub> (0.1 M) at 500 MHz

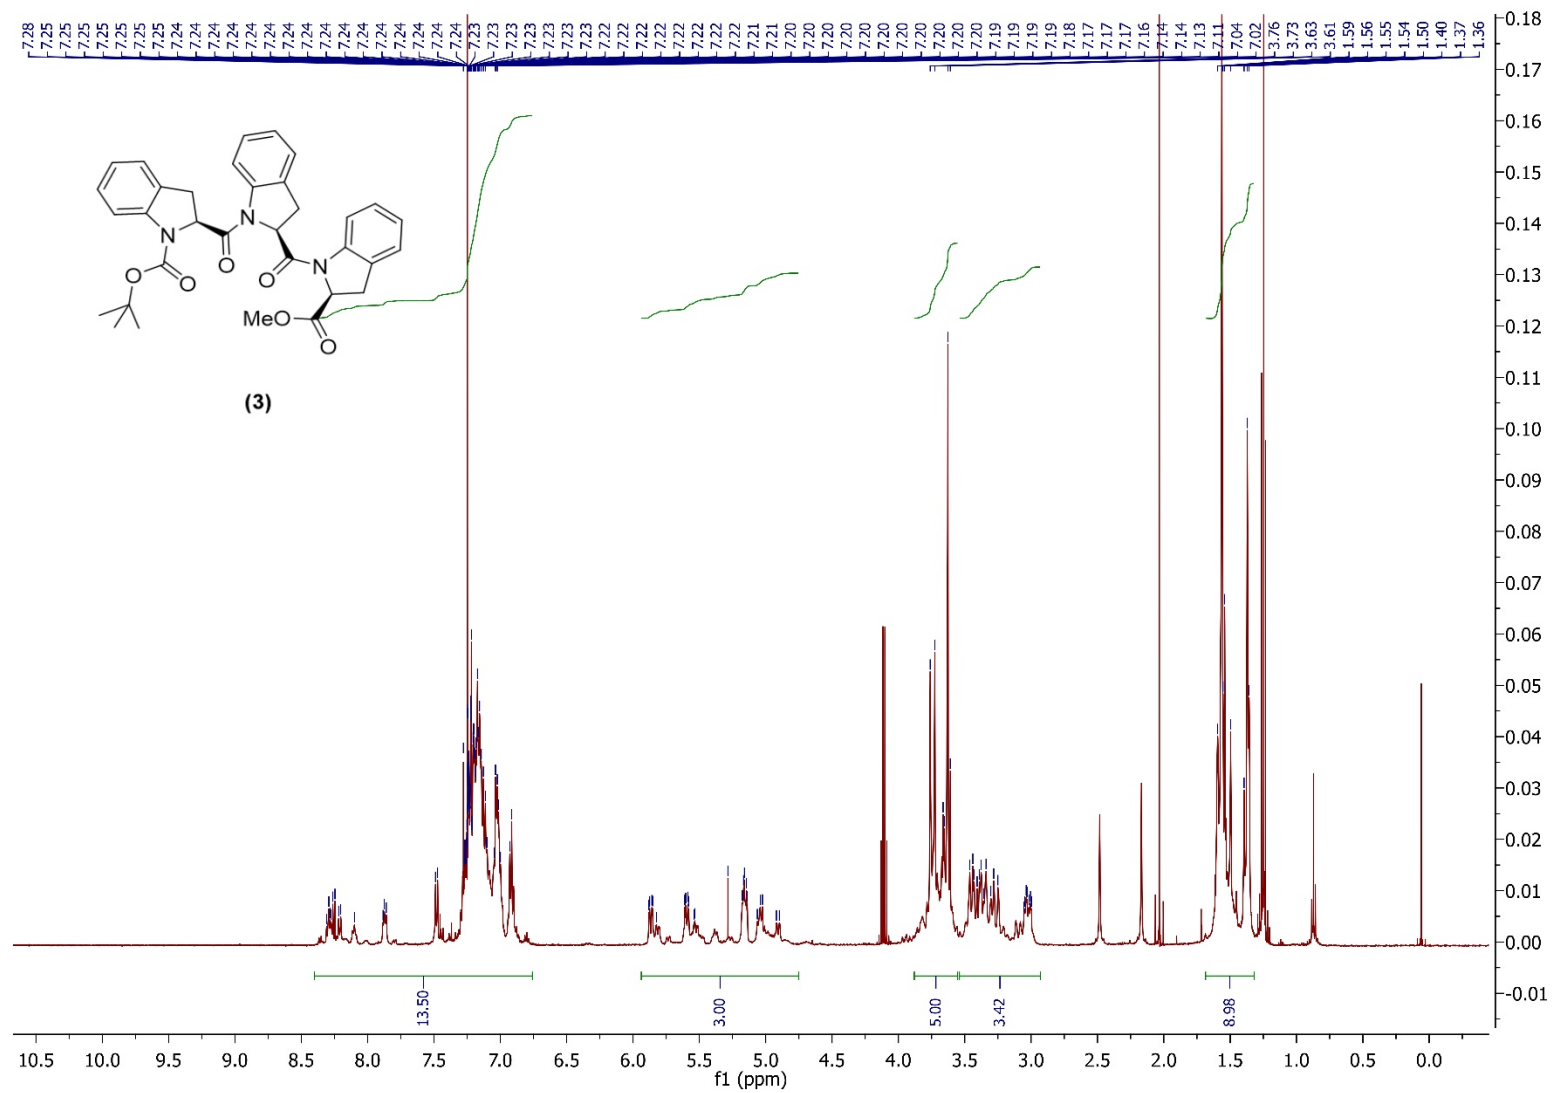

$^1\text{H}$  NMR spectrum of Boc-((2*S*)-Ind)<sub>3</sub>-OMe (**3**) in DMSO-*d*<sub>6</sub> (0.1 M) at 500 MHz

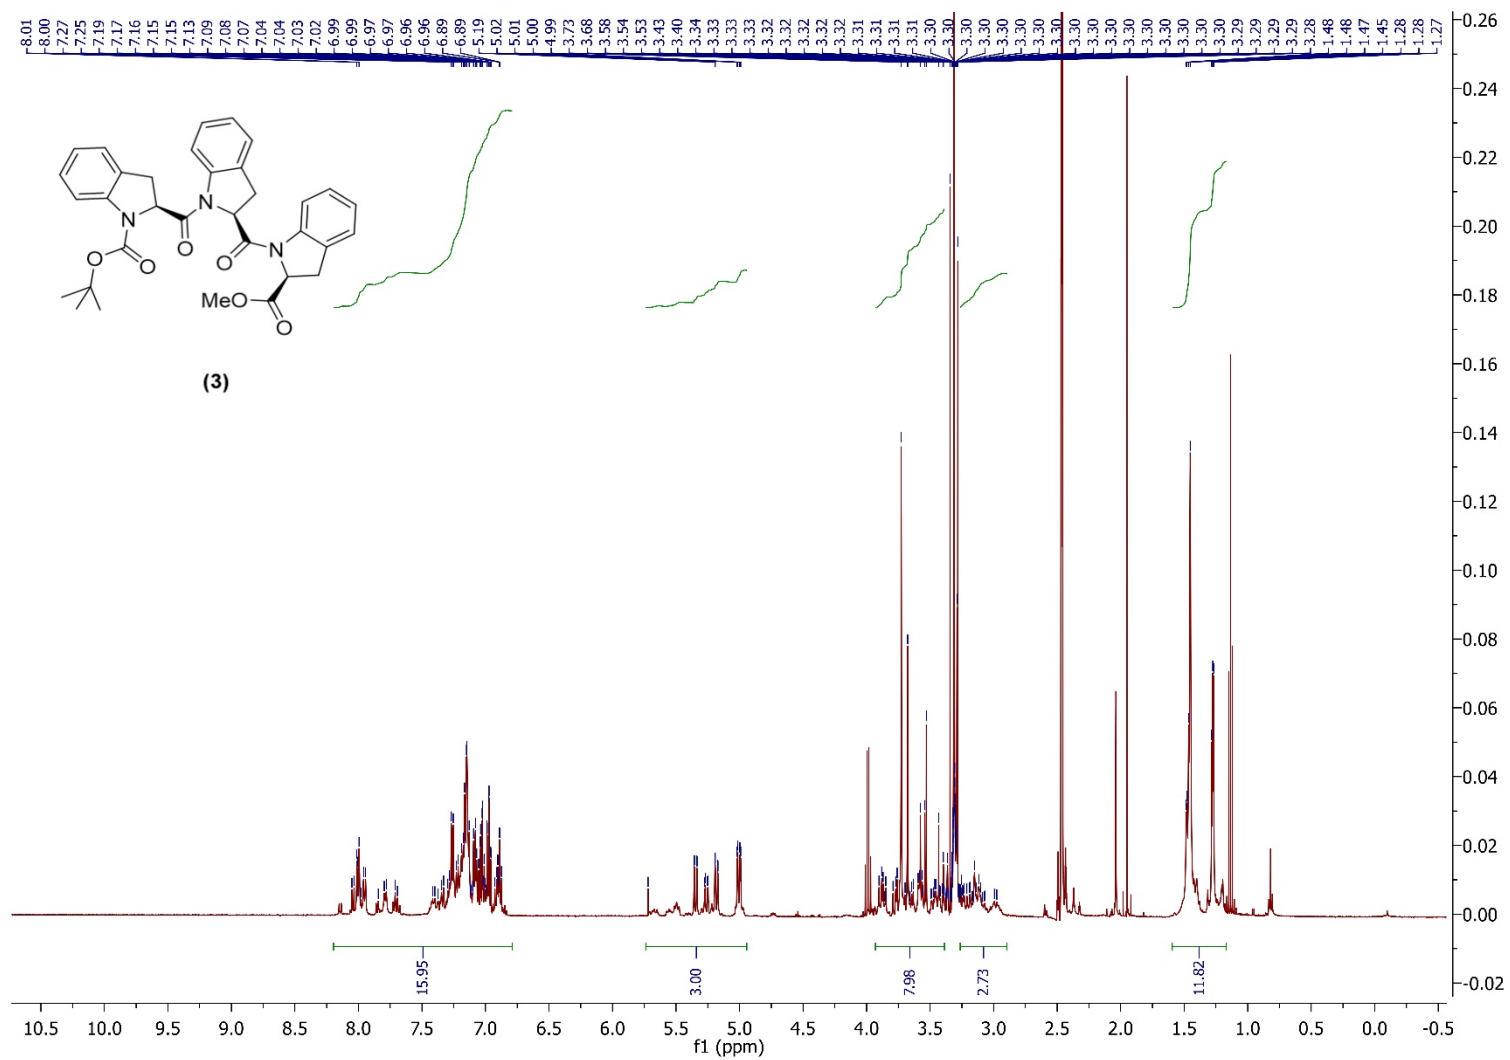

$^{13}\text{C}\{^1\text{H}\}$ NMR spectrum of Boc-((2*S*)-Ind)<sub>3</sub>-OMe (**3**) in DMSO-*d*<sub>6</sub> at 125 MHz

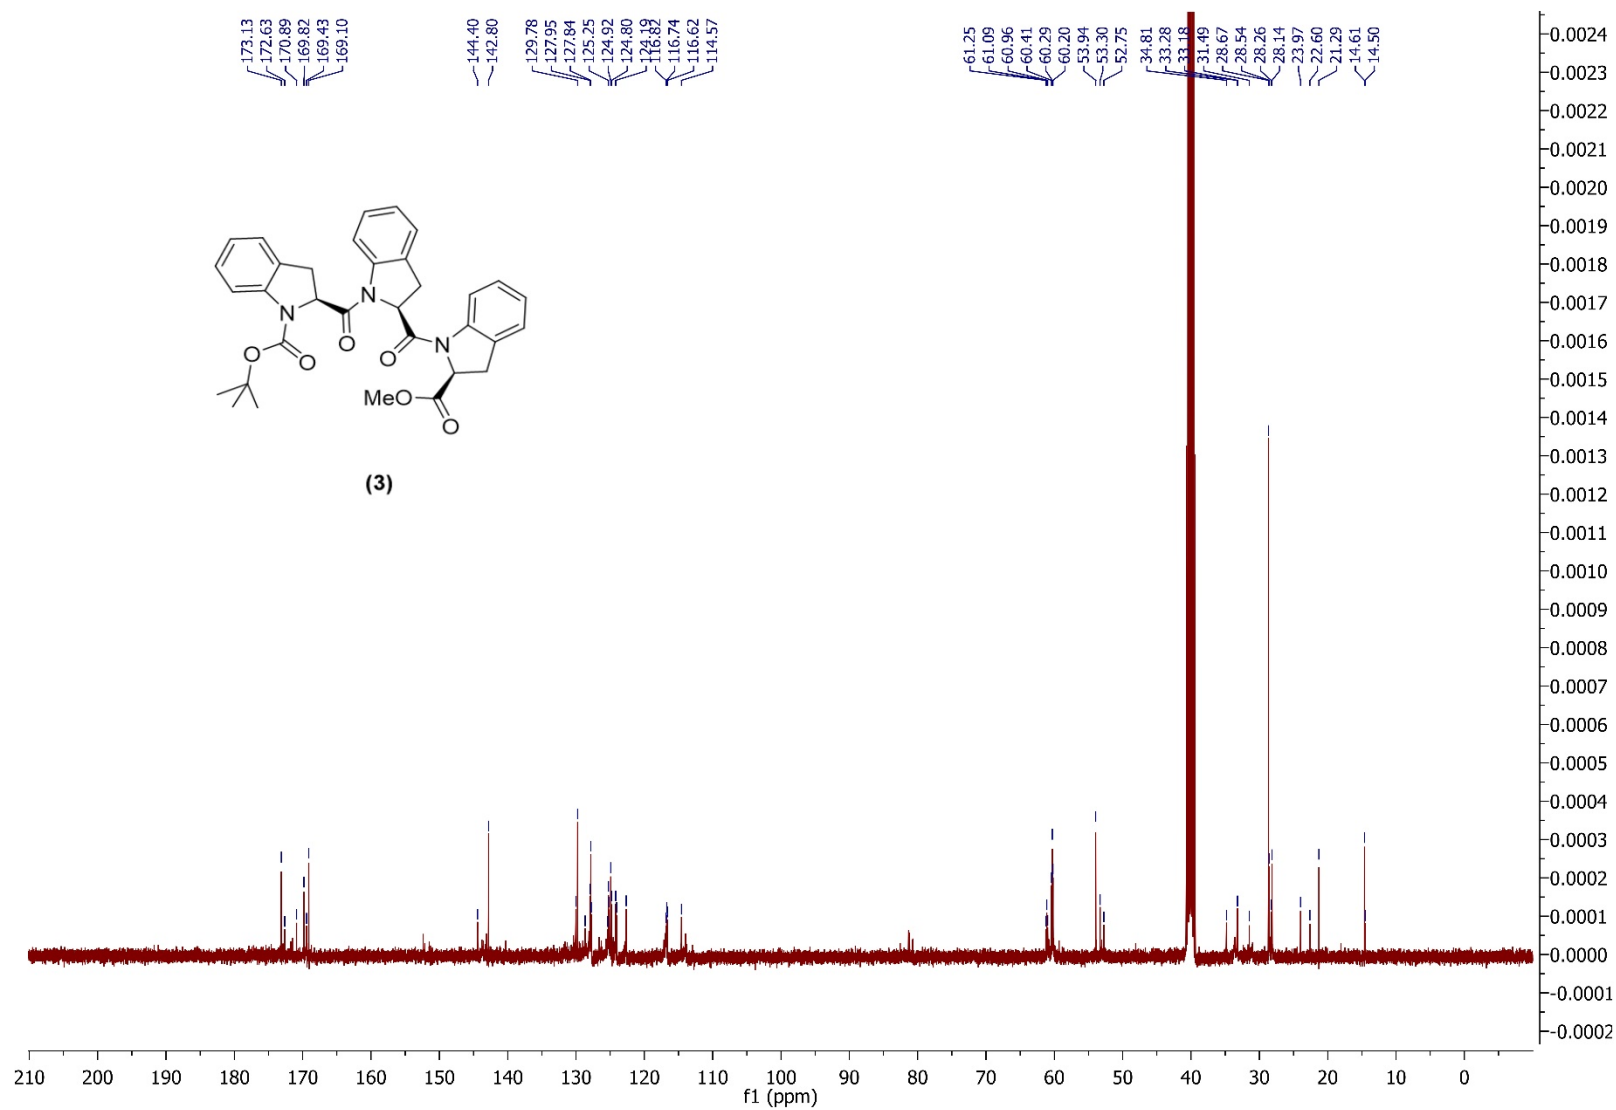

$^1\text{H}$  NMR spectrum of Boc-((2*S*)-Ind)<sub>4</sub>-OMe (**4**) in CDCl<sub>3</sub> (0.1 M) at 500 MHz

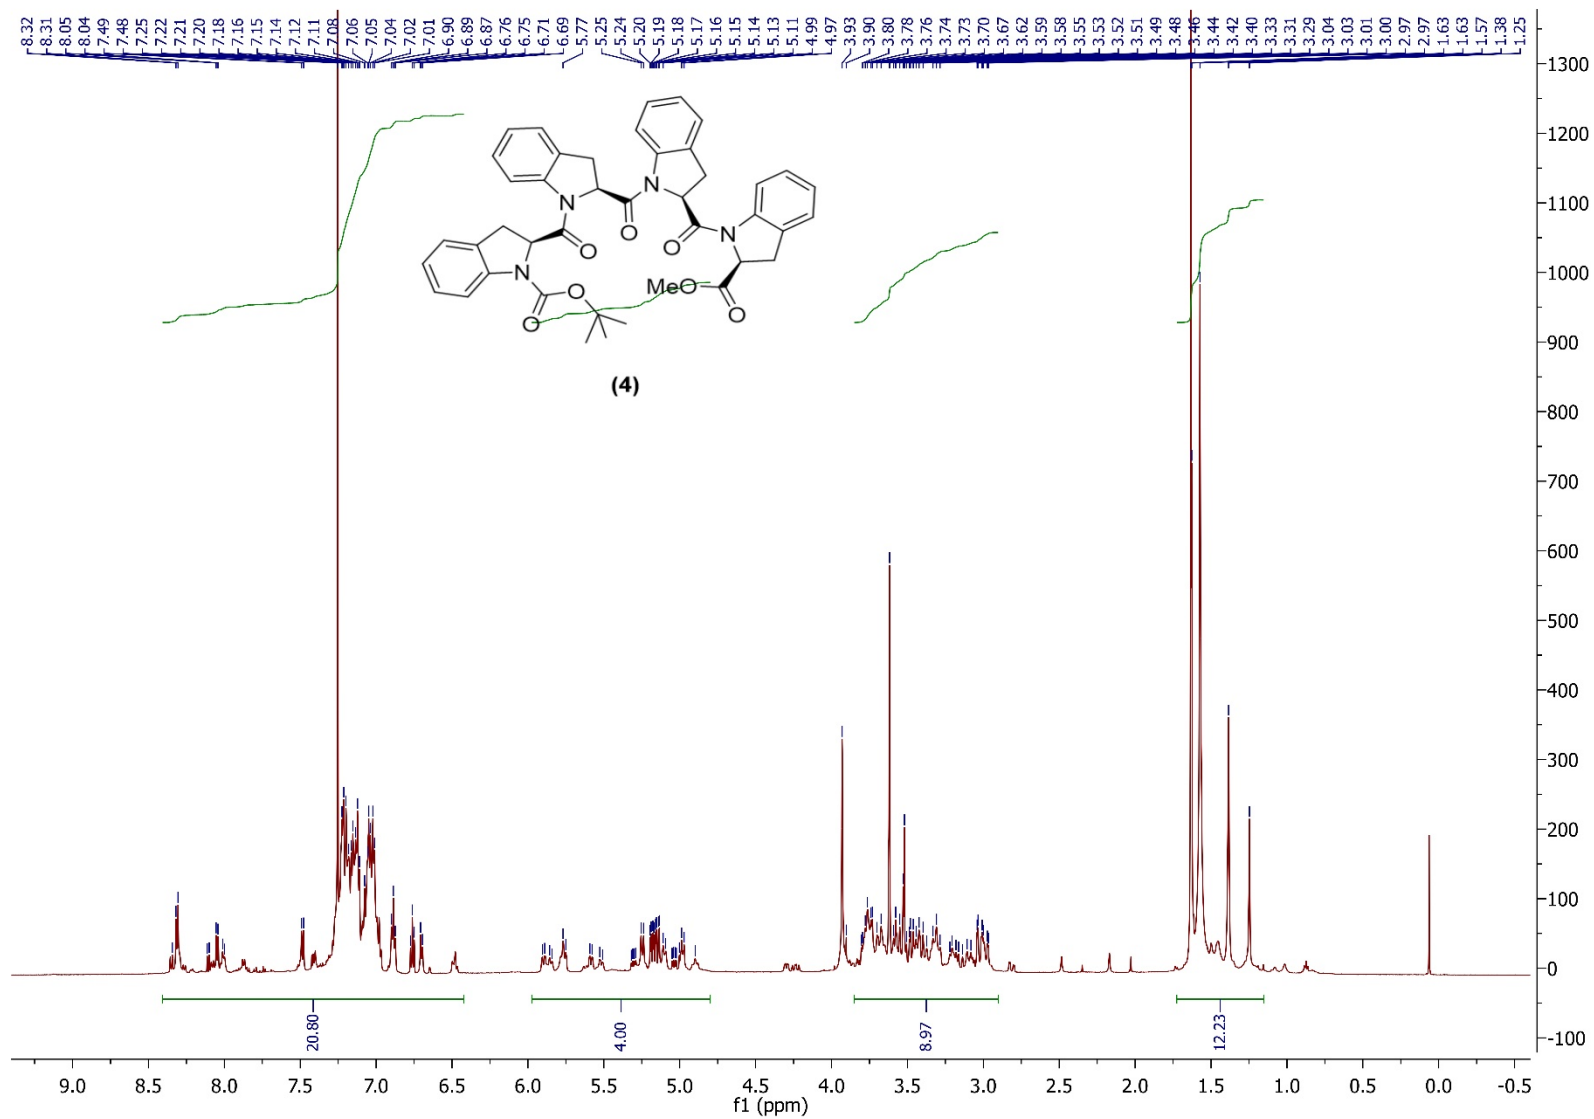



$^{13}\text{C}\{^1\text{H}\}$ NMR spectrum of Boc-((2S)-Ind) $_4$ -OMe (**4**) in DMSO- $d_6$  at 150 MHz

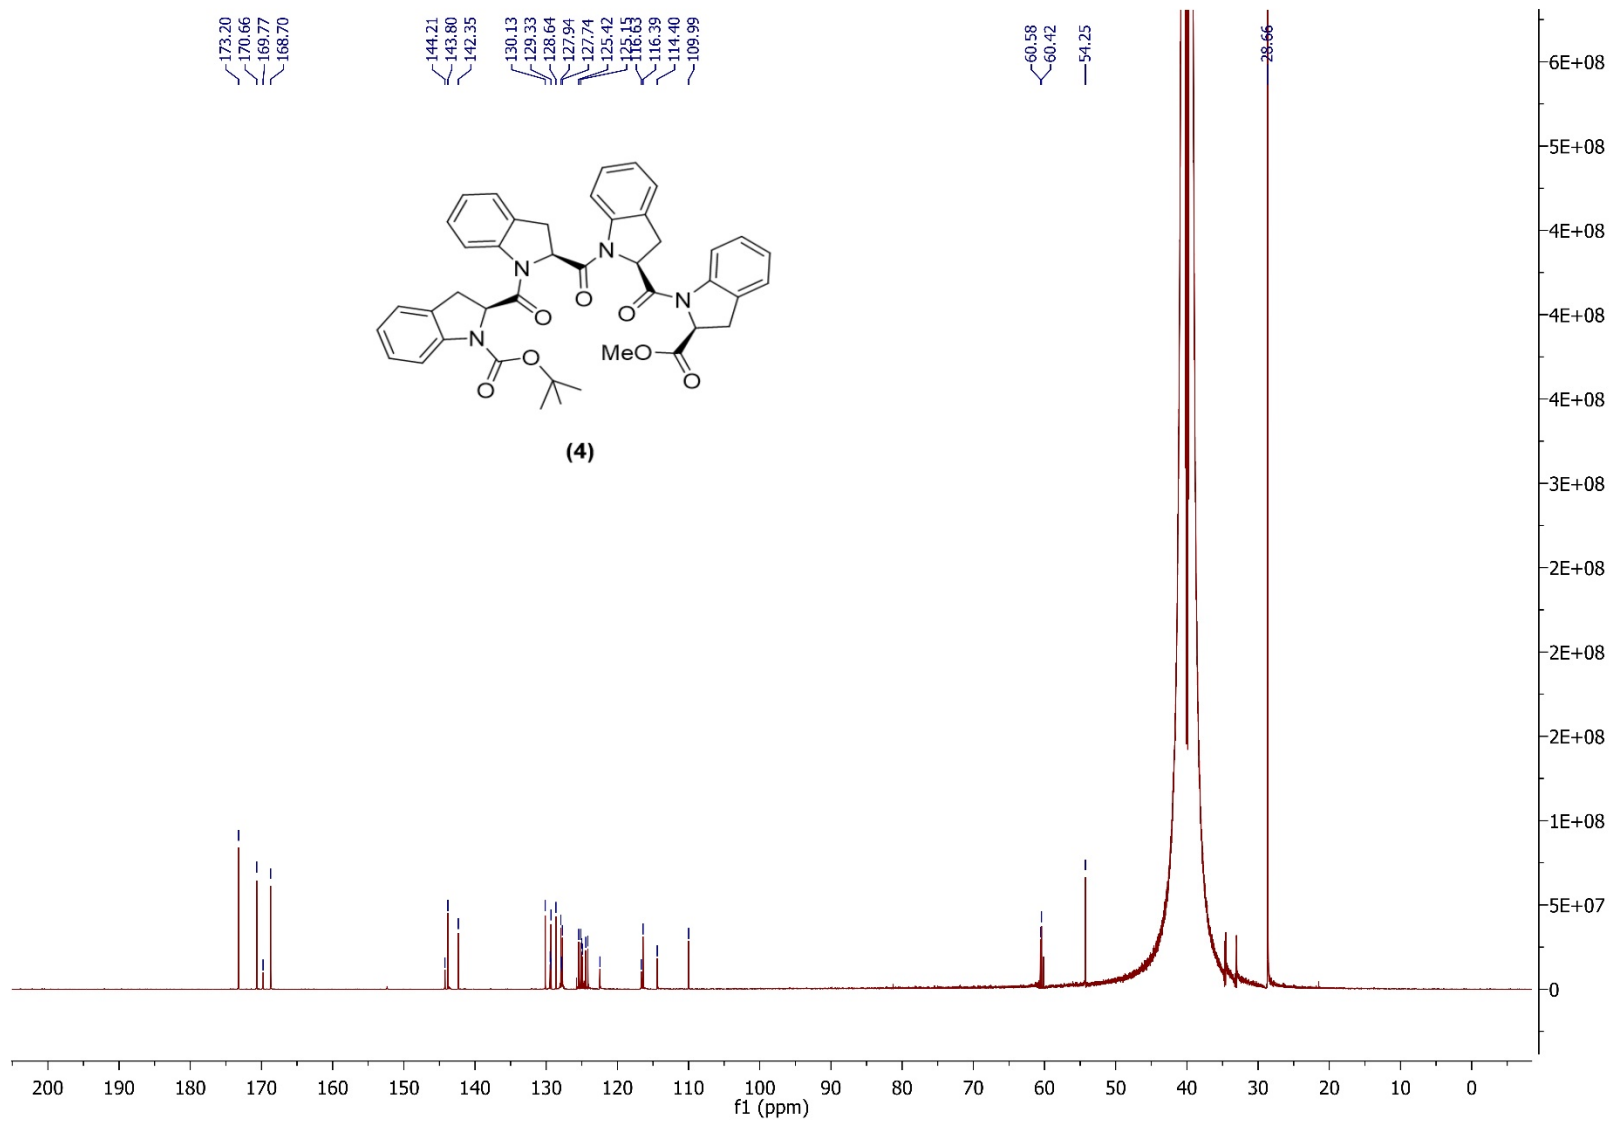

2D HSQC (600 MHz, DMSO-d6, 10 mM, 25 °C) map of Boc-((2S)-Ind)<sub>4</sub>-OMe (4)

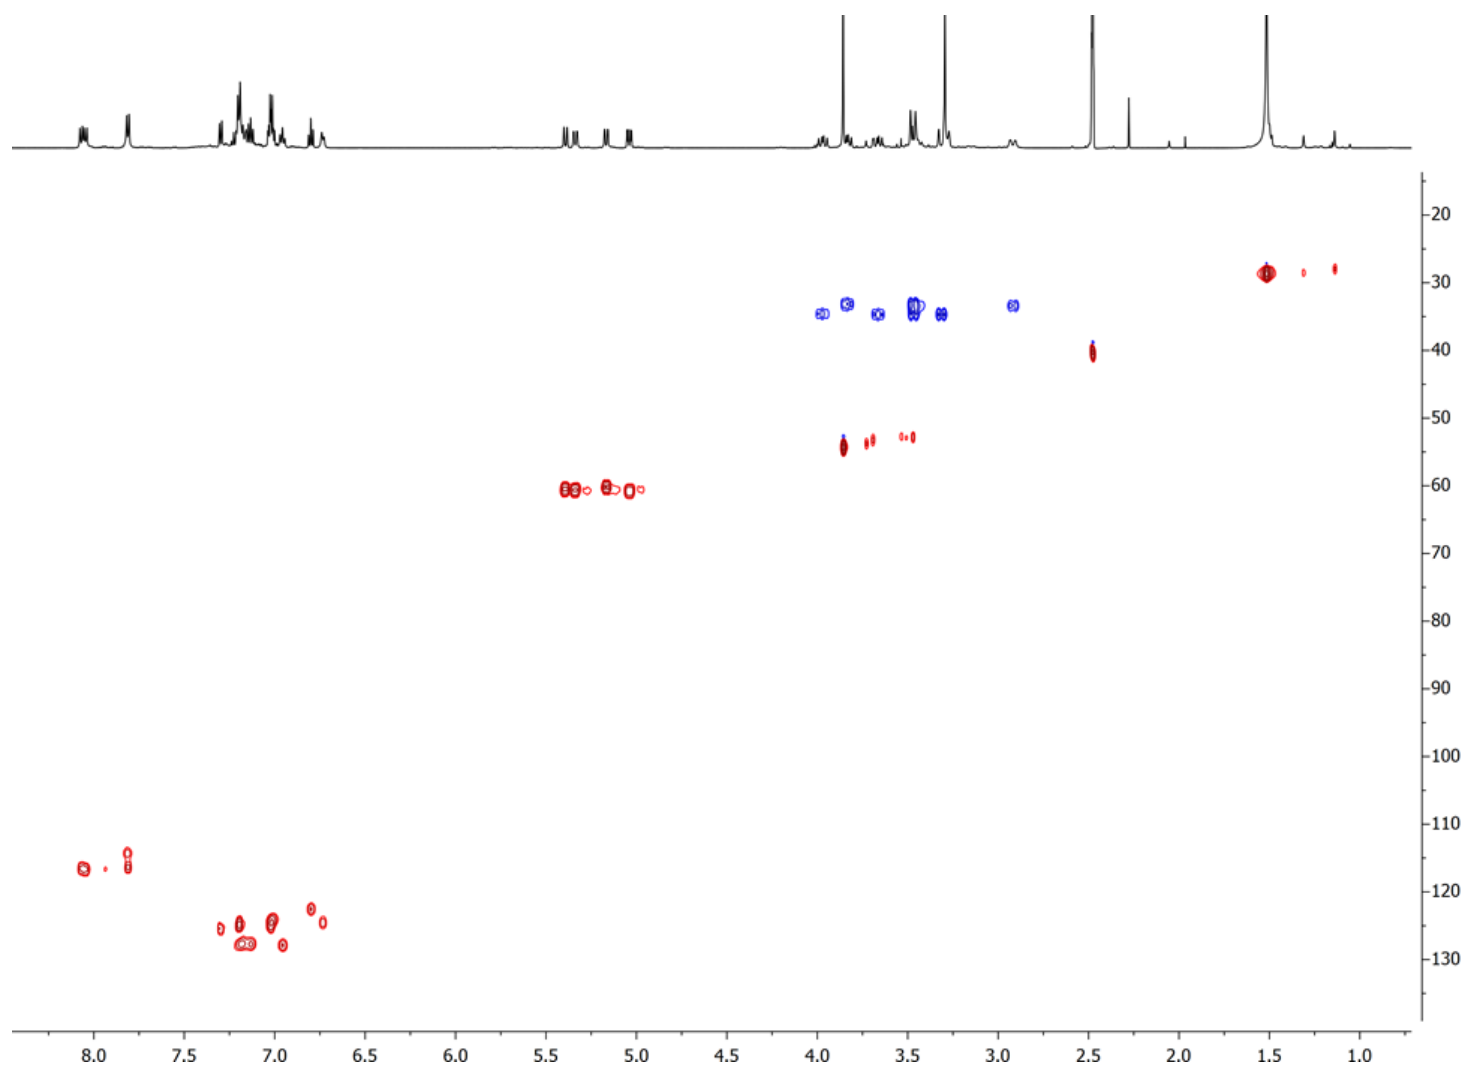

2D ROESY (600 MHz, DMSO-d<sub>6</sub>, 10 mM, 25 °C, mix 0.6 s) map of Boc-((2S)-Ind)<sub>4</sub>-OMe (4)

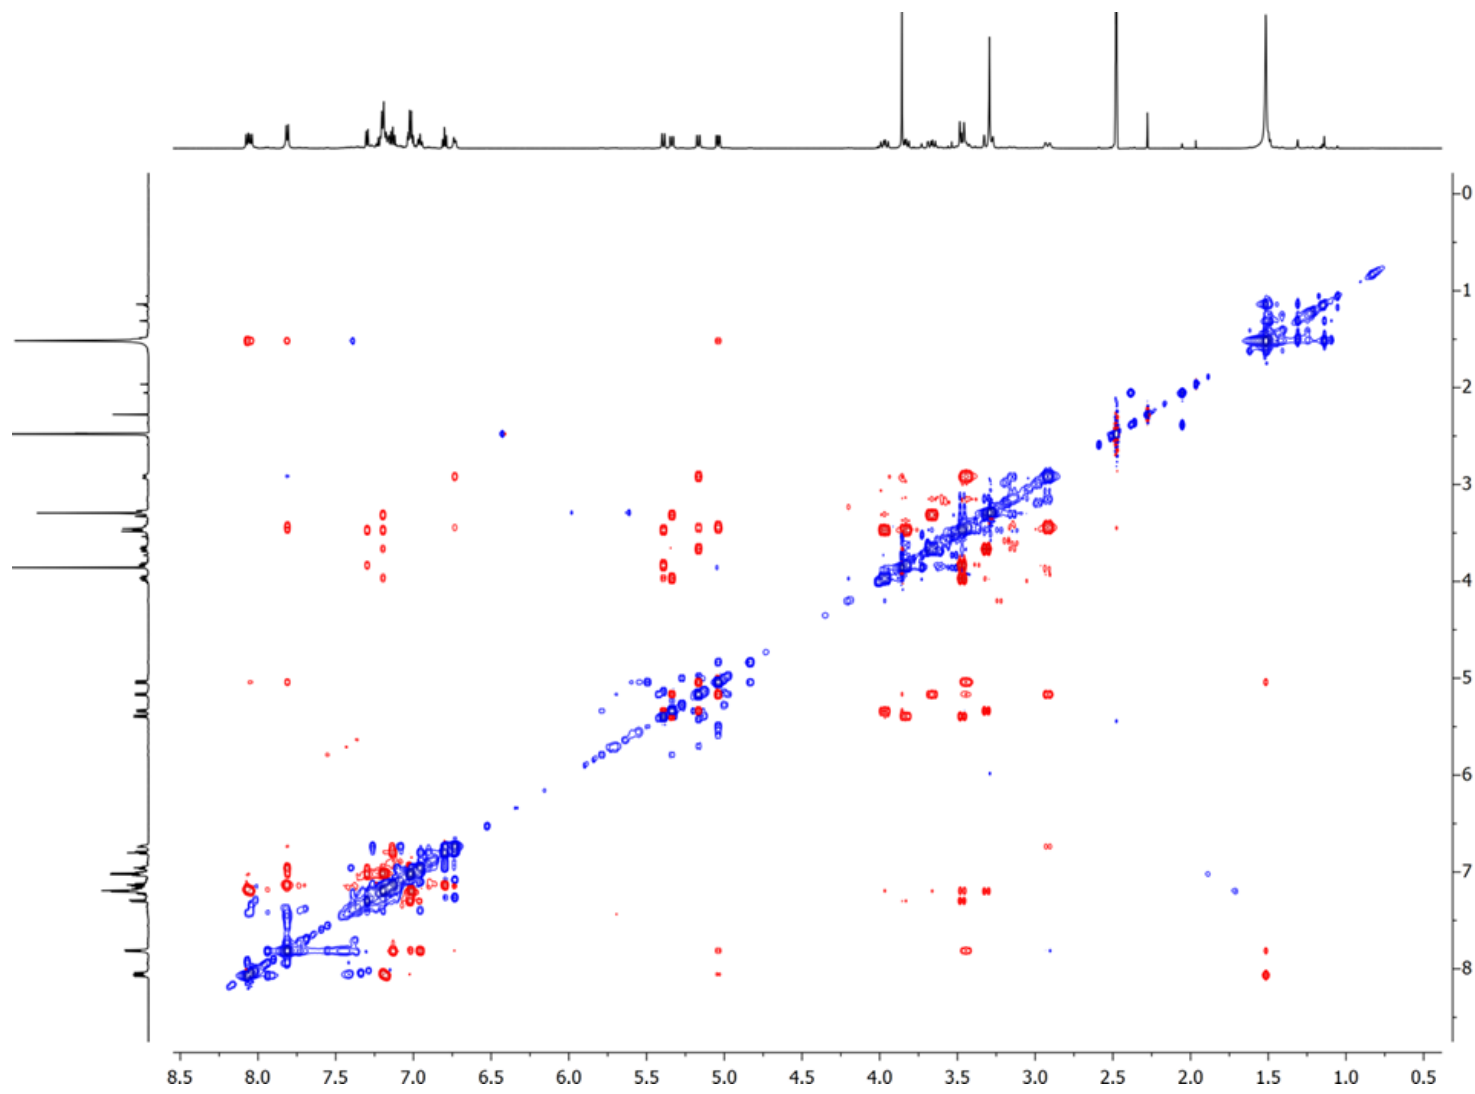



2D COSY (600 MHz, DMSO-d<sub>6</sub>, 10 mM, 25 °C) map of Boc-((2*S*)-Ind)<sub>4</sub>-OMe (4)

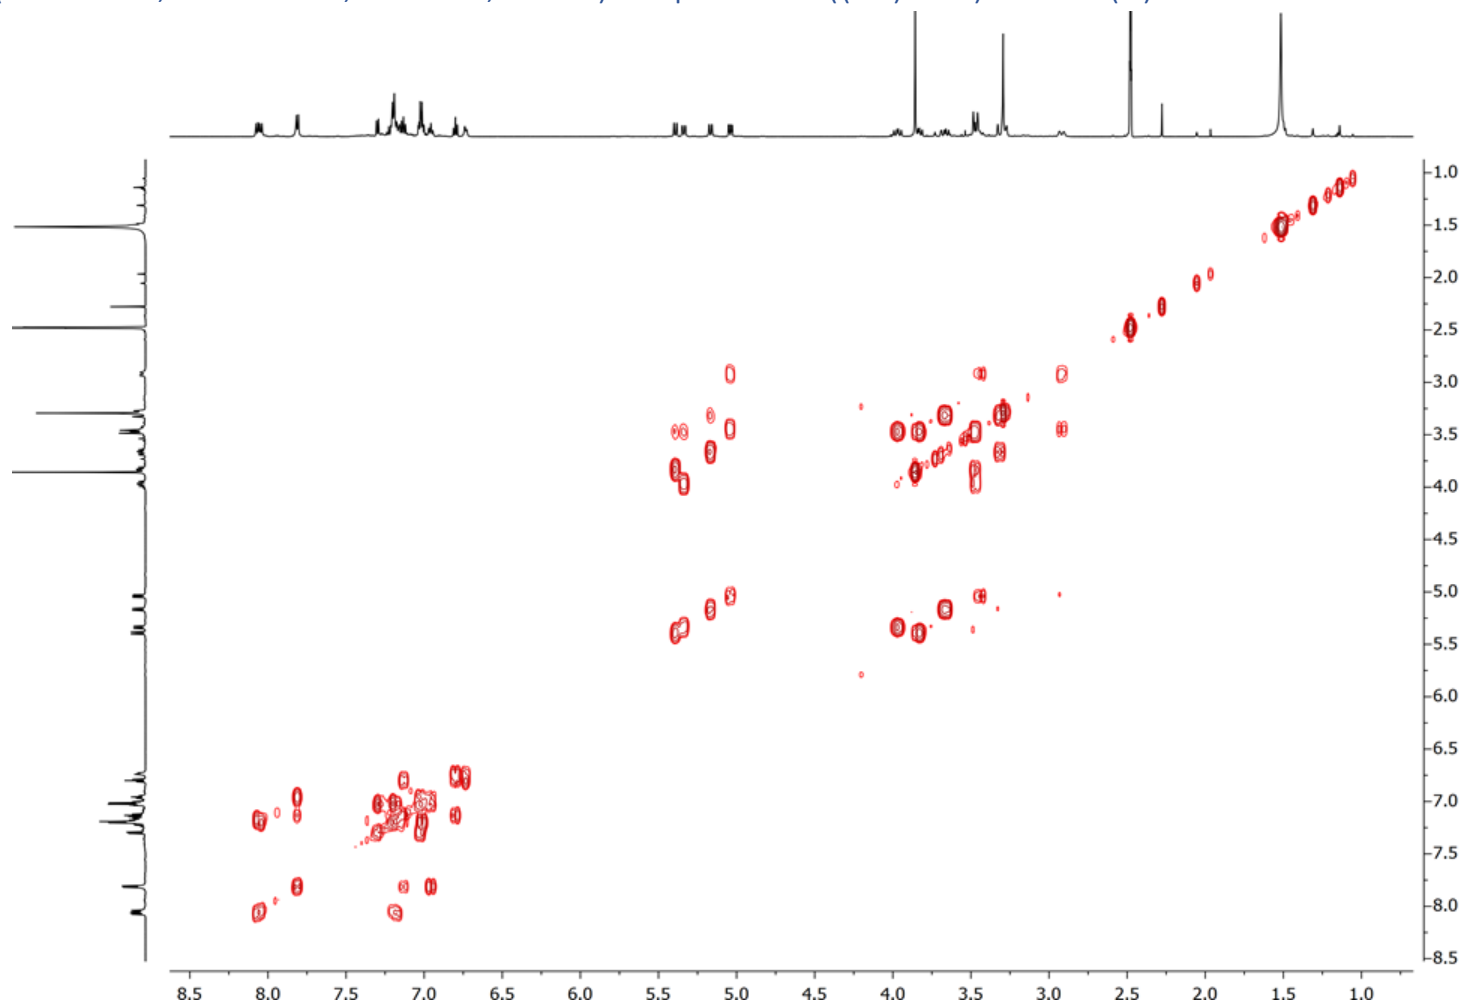

2D TOCSY (600 MHz, DMSO-d6, 10 mM, 25 °C) map of Boc-((2*S*)-Ind)<sub>4</sub>-OMe (**4**)

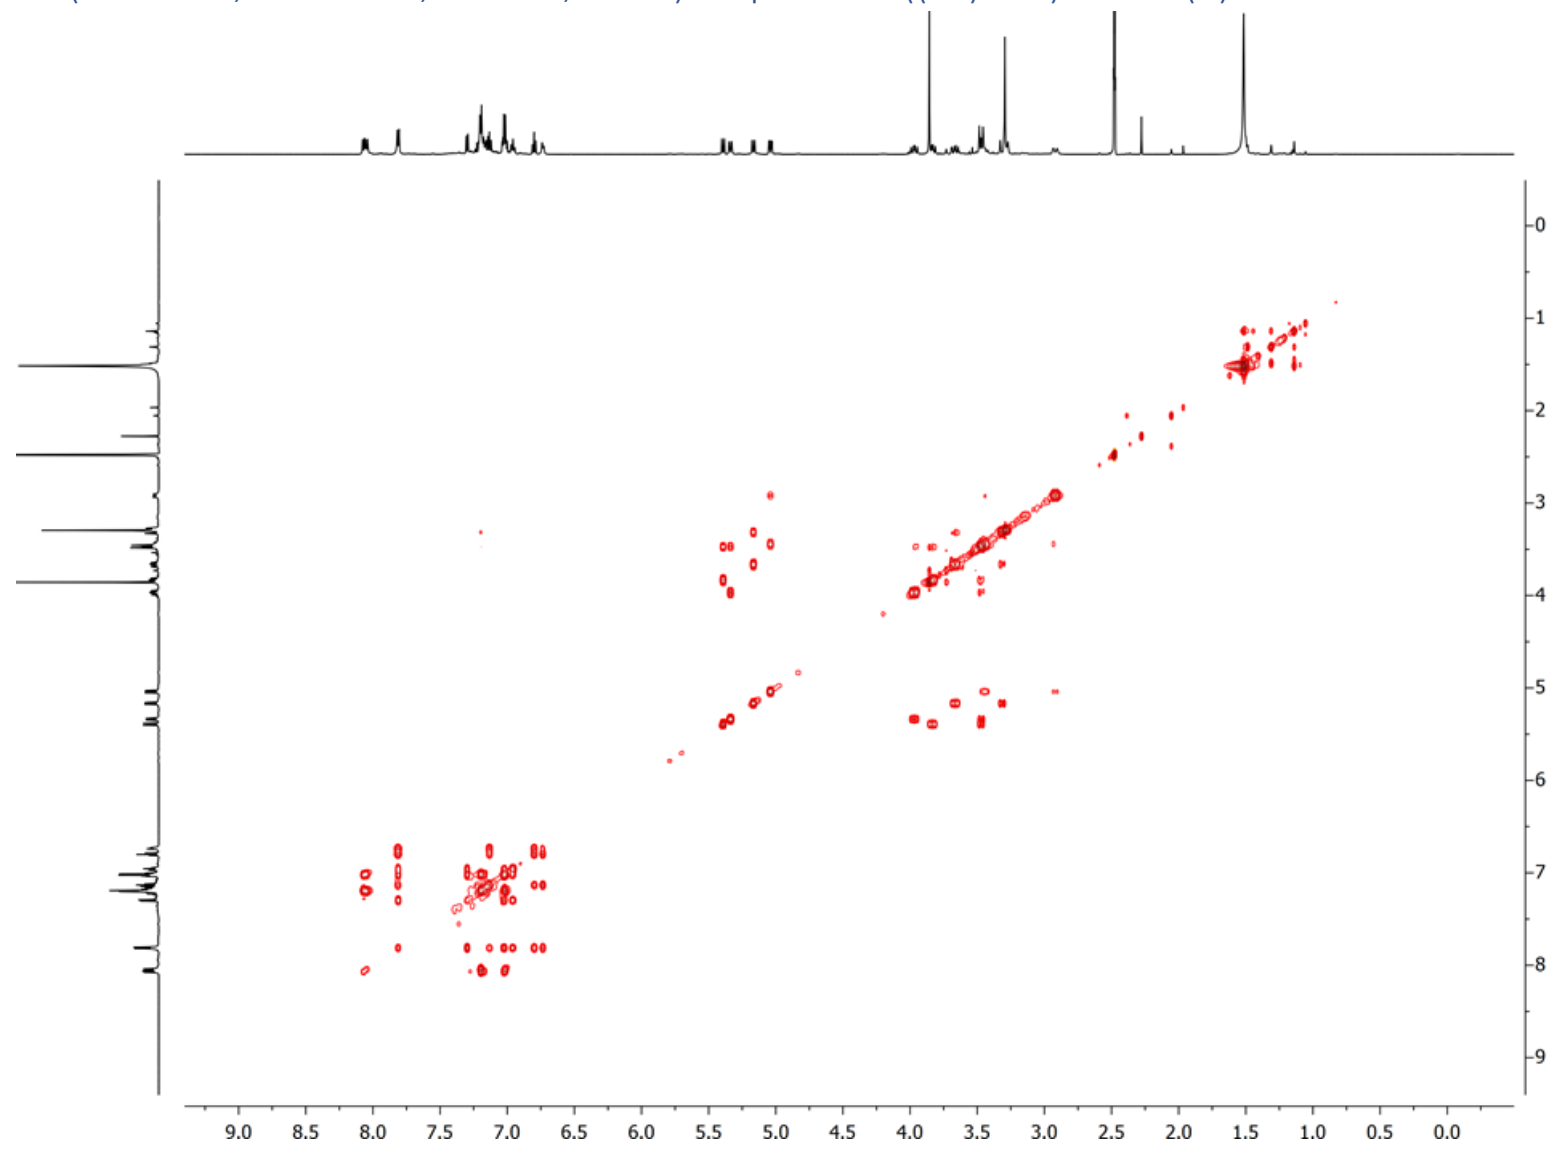

# HPLC-MS analysis of (1)

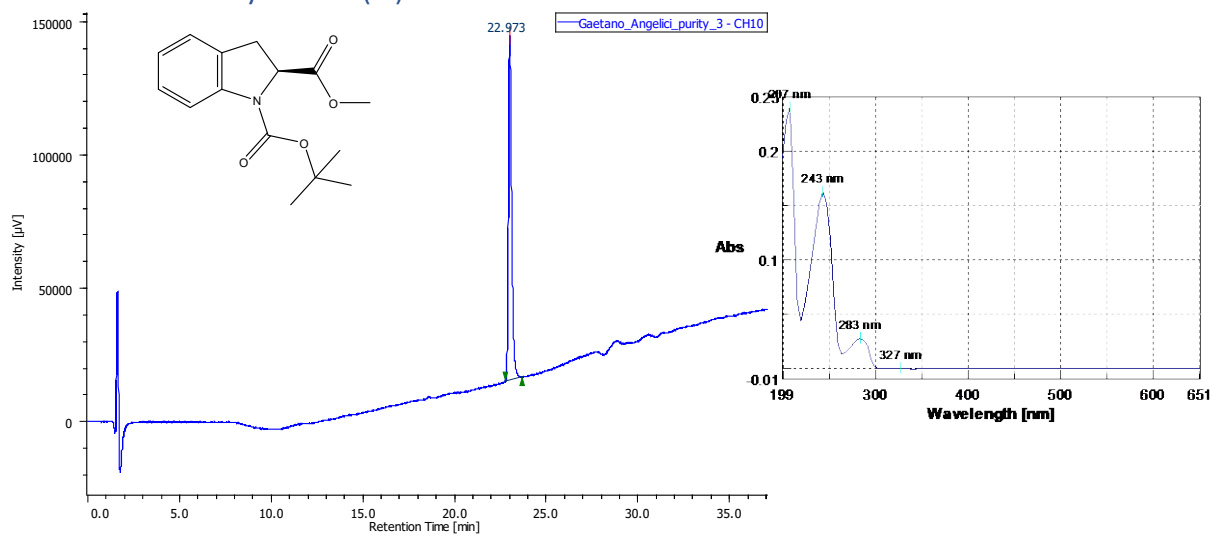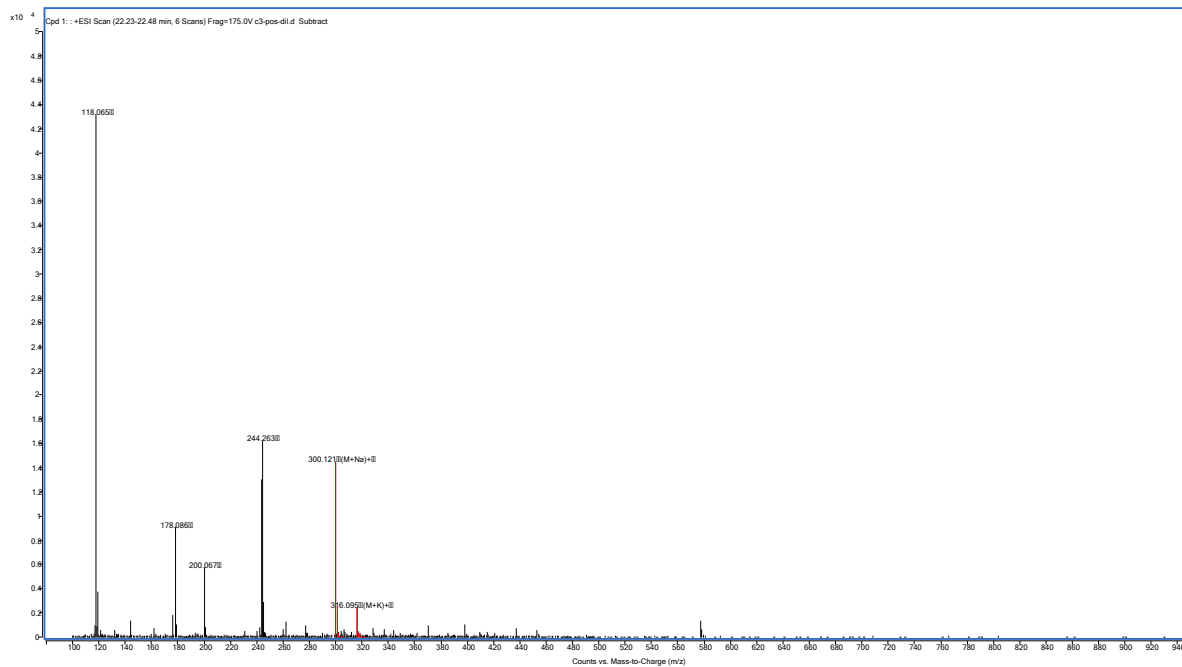

| Sample name | Formula                                         | Base peak (ion)    | m/z        |                   | Diff (ppm) |
|-------------|-------------------------------------------------|--------------------|------------|-------------------|------------|
|             |                                                 |                    | exact mass | experimental mass |            |
| 1           | C <sub>15</sub> H <sub>19</sub> NO <sub>4</sub> | [M+K] <sup>+</sup> | 316.0946   | 316.0952          | 2.0        |

## HPLC-MS analysis of (2)

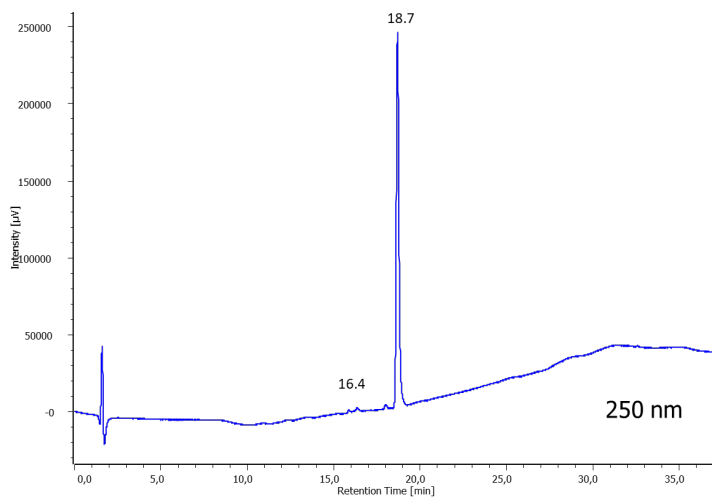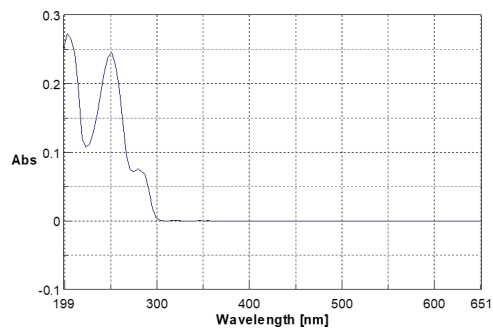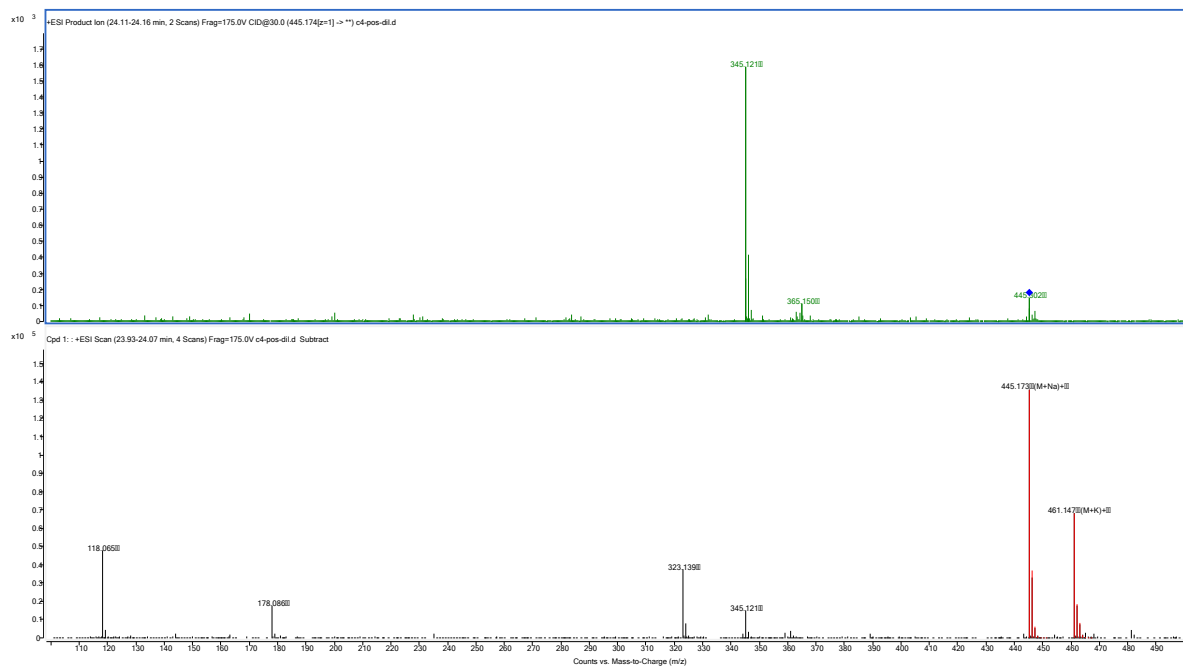

| Sample name | Formula                                                       | Base peak (ion)     | <i>m/z</i> |                   | Diff (ppm) |
|-------------|---------------------------------------------------------------|---------------------|------------|-------------------|------------|
|             |                                                               |                     | exact mass | experimental mass |            |
| 2           | C <sub>24</sub> H <sub>26</sub> N <sub>2</sub> O <sub>5</sub> | [M+Na] <sup>+</sup> | 445.1734   | 445.1733          | 0.2        |

## HPLC-MS analysis of (3)

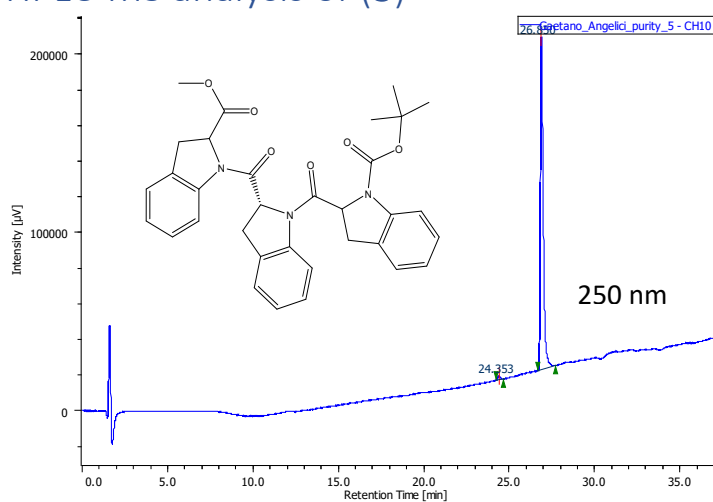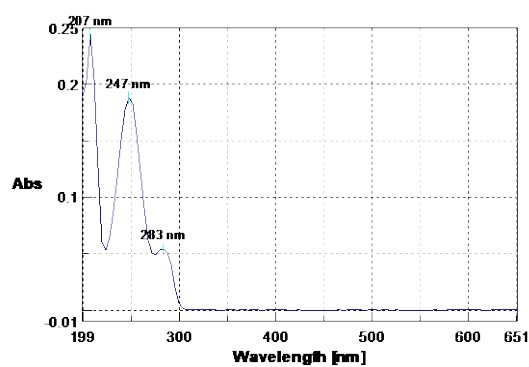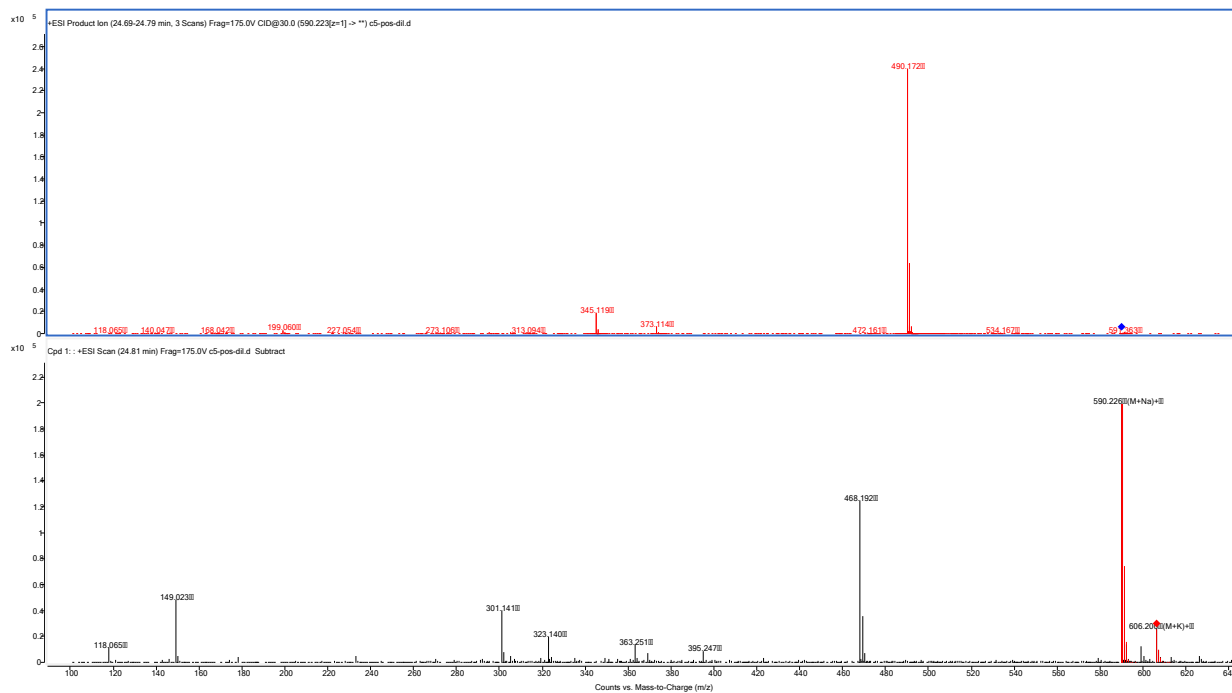

| Sample name | Formula                                                       | Base peak (ion)    | m/z        |                   | Diff (ppm) |
|-------------|---------------------------------------------------------------|--------------------|------------|-------------------|------------|
|             |                                                               |                    | exact mass | experimental mass |            |
| <b>3</b>    | C <sub>33</sub> H <sub>33</sub> N <sub>3</sub> O <sub>6</sub> | [M+K] <sup>+</sup> | 606.2001   | 606.1999          | 0.32       |

## HPLC-MS analysis of (4)

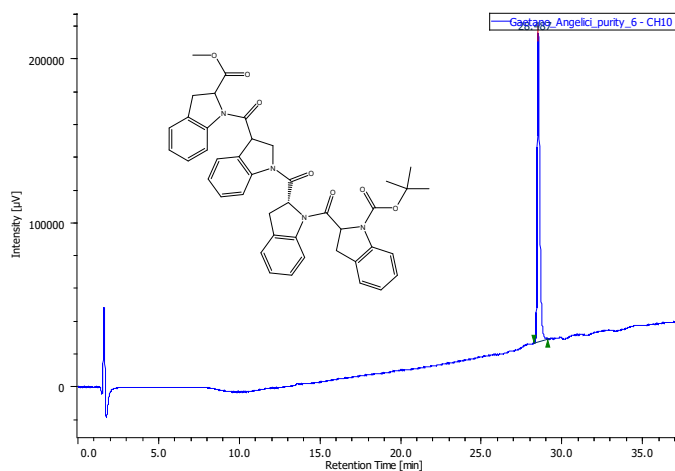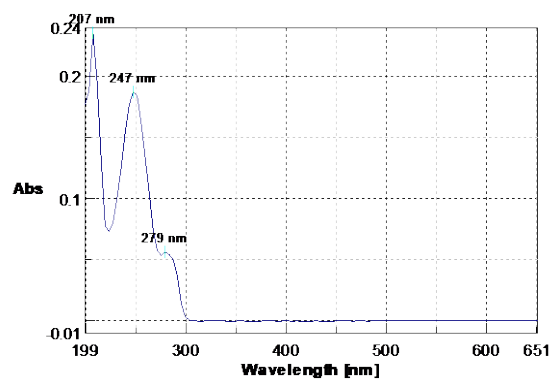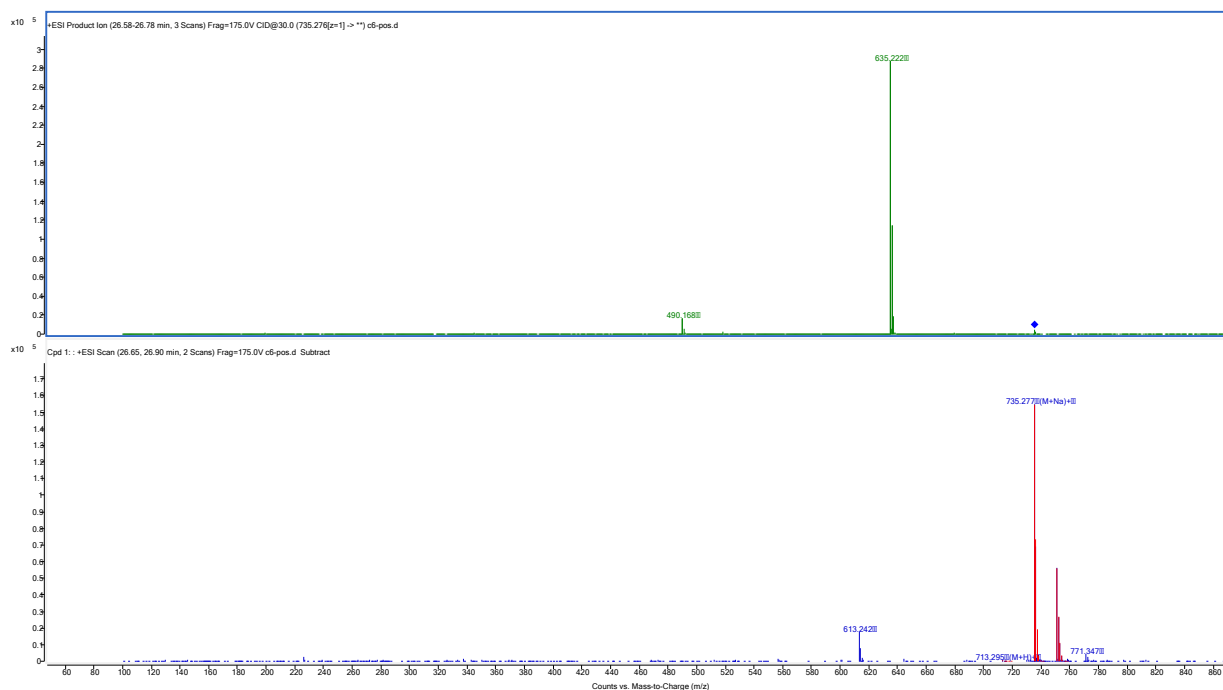

| Sample name | Formula                                                       | Base peak (ion)     | m/z        |                   | Diff (ppm) |
|-------------|---------------------------------------------------------------|---------------------|------------|-------------------|------------|
|             |                                                               |                     | exact mass | experimental mass |            |
| 4           | C <sub>42</sub> H <sub>40</sub> N <sub>4</sub> O <sub>7</sub> | [M+Na] <sup>+</sup> | 735.2789   | 735.2773          | 2.2        |

**Table S1.** Crystal data and structure refinement of (4)

|                                                           |                                                               |
|-----------------------------------------------------------|---------------------------------------------------------------|
| CCDC number                                               | 2173109                                                       |
| Empirical formula                                         | C <sub>42</sub> H <sub>40</sub> N <sub>4</sub> O <sub>7</sub> |
| Formula weight                                            | 712.78                                                        |
| Crystal system                                            | Monoclinic                                                    |
| Space group                                               | <i>P</i> 2 <sub>1</sub>                                       |
| <i>a</i> (Å)                                              | 10.4762(8)                                                    |
| <i>b</i> (Å)                                              | 9.2900(7)                                                     |
| <i>c</i> (Å)                                              | 19.1539(13)                                                   |
| $\beta$ (°)                                               | 100.148(3)                                                    |
| Volume (Å <sup>3</sup> )                                  | 1835.0(2)                                                     |
| <i>Z</i>                                                  | 2                                                             |
| $\rho_{\text{calc}}$ (g cm <sup>-3</sup> )                | 1.290                                                         |
| $\mu$ (mm <sup>-1</sup> )                                 | 0.089                                                         |
| <i>F</i> (000)                                            | 752                                                           |
| $\theta$ range (°)                                        | 3.0 to 26.5                                                   |
| Reflections collected                                     | 25312                                                         |
| Independent reflections                                   | 7460 ( <i>R</i> <sub>int</sub> = 0.0162)                      |
| Goodness-of-fit on <i>F</i> <sup>2</sup>                  | 1.041                                                         |
| Final <i>R</i> <sub>1</sub> [ <i>I</i> ≥ 2σ( <i>I</i> )]  | 0.0404                                                        |
| Final <i>wR</i> <sub>2</sub> [ <i>I</i> ≥ 2σ( <i>I</i> )] | 0.1093                                                        |
| Final <i>R</i> <sub>1</sub> [all data]                    | 0.0432                                                        |
| Final <i>wR</i> <sub>2</sub> [all data]                   | 0.1124                                                        |

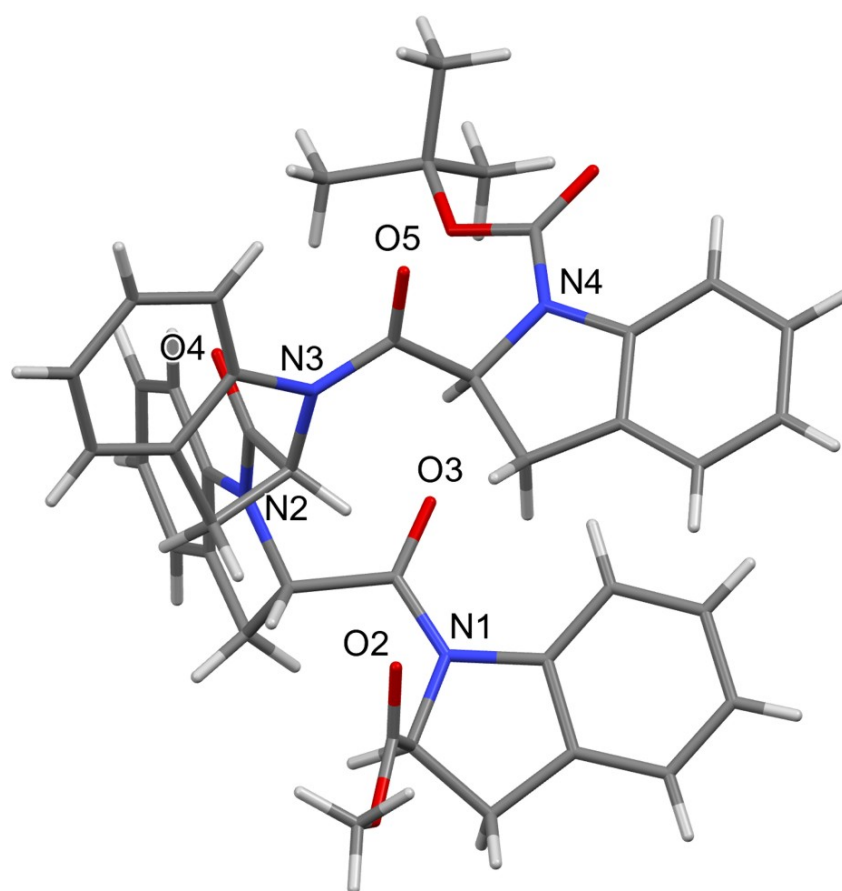

## Table S2. Description of main C–H...O interactions

Along the peptide chain, which shows a helical conformation, the peptide groups alternate with the residues of the indoline-2-carboxylic acid which show CO–N–C–CO torsion angles ranging between 70.8 and 85.9 degrees. The peptide groups are essentially planar due both to the resonance effect and to hydrogen interactions with the CH group in position 7 of the indole ring of proline. The strongest C–H...O interactions are listed in the Table and illustrated in the Figure below.

| Groups        | C...O distance / Å | C–H...O angle / deg |
|---------------|--------------------|---------------------|
| C42–H42B...O6 | 2.840(8)           | 120.7               |
| C18–H18...O4  | 2.853(3)           | 116.1               |
| C36–H36...O6  | 2.862(5)           | 115.2               |
| C27–H27...O5  | 2.868(4)           | 115.2               |
| C9–H9...O3    | 2.903(4)           | 115.6               |

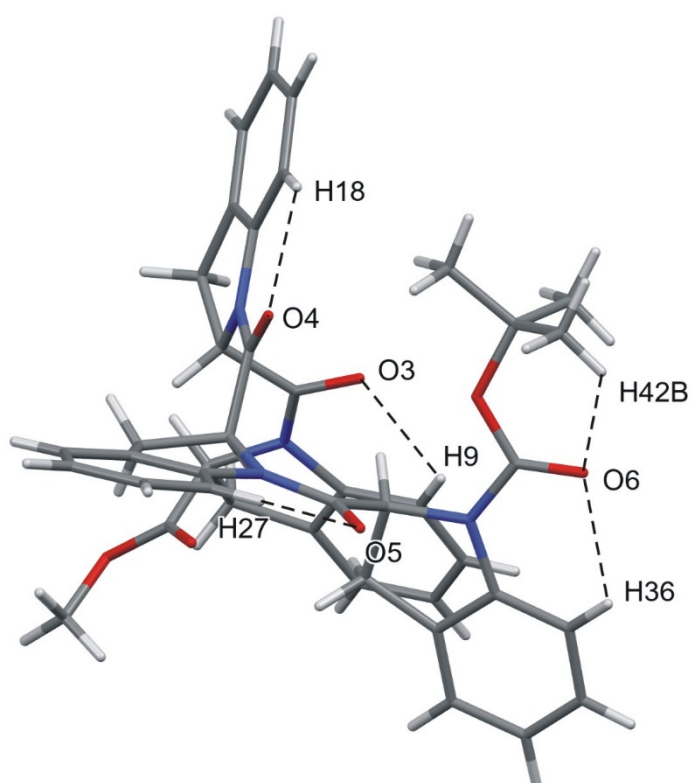



**Table S3.** Calculated energy differences between conformers

Energies and dihedral angles for the conformations extracted from the PBMetaD simulations in DMSO and chloroform. Some conformations were found in both solvents, while most of them are found only in one of the solvents. The dihedral angles and molecular dipole refer to the DFT-optimized structure (in DMSO where present, otherwise in chloroform). The number of amide bonds in *cis* conformation is also reported.

| Conf. | N. cis | $\omega$ A | $\omega$ B | $\omega$ C | $\omega$ D | $\psi$ B | $\psi$ C | $\psi$ D | Solv.             | G(DMSO) | G(CHCl <sub>3</sub> ) | Dipole (D) |
|-------|--------|------------|------------|------------|------------|----------|----------|----------|-------------------|---------|-----------------------|------------|
| 0     | 3      | 2          | -3         | -17        | -176       | 161      | 145      | 157      | DMSO              | 3.35    |                       | 12.4       |
| 1     | 4      | 3          | -11        | -13        | 4          | 164      | 160      | 160      | both              | 0.9     | 2.78                  | 20.7       |
| 2     | 1      | 164        | -176       | -14        | 176        | 165      | 110      | 174      | DMSO              | 4.85    |                       | 6.6        |
| 3     | 3      | 5          | -173       | -8         | -8         | 145      | 116      | 168      | both              | 5.23    | 5.98                  | 5.1        |
| 4     | 2      | -11        | 179        | 174        | -3         | 159      | 172      | 146      | CHCl <sub>3</sub> |         | 7.05                  | 6.1        |
| 5     | 2      | 11         | 2          | -176       | -172       | -31      | 161      | 146      | CHCl <sub>3</sub> |         | 1.46                  | 3.0        |
| 6     | 3      | 0          | -14        | -28        | 178        | -32      | -17      | 170      | DMSO              | 2.76    |                       | 8.8        |
| 7     | 2      | -13        | -172       | -17        | -178       | 158      | 108      | 174      | DMSO              | 2.81    |                       | 4.2        |
| 8     | 3      | -3         | -12        | -178       | -8         | -31      | 166      | 144      | CHCl <sub>3</sub> |         | 1.02                  | 3.6        |
| 9     | 2      | -164       | -7         | -4         | 177        | 144      | 140      | 166      | DMSO              | 4.12    |                       | 13.3       |
| 10    | 2      | -169       | 0          | -178       | -15        | -31      | 166      | 105      | CHCl <sub>3</sub> |         | 5.82                  | 4.7        |
| 11    | 3      | 178        | 4          | 13         | 11         | 156      | -26      | 169      | CHCl <sub>3</sub> |         | 8.7                   | 6.8        |
| 12    | 1      | -172       | 2          | -177       | -172       | -30      | 162      | 146      | CHCl <sub>3</sub> |         | 2.82                  | 7.8        |
| 13    | 2      | -163       | 34         | -4         | 177        | -18      | -28      | 169      | DMSO              | 3.73    |                       | 5.4        |
| 14    | 3      | -6         | -10        | -173       | 7          | -35      | 174      | -28      | CHCl <sub>3</sub> |         | 2.92                  | 8.8        |
| 15    | 3      | -9         | -176       | -1         | 11         | 150      | 141      | -46      | DMSO              | 1.81    |                       | 6.4        |
| 16    | 3      | -178       | -7         | -15        | 2          | 160      | 163      | 163      | both              | 1.78    | 4.21                  | 18.0       |
| 17    | 2      | 178        | 7          | 3          | 175        | 151      | -36      | 167      | both              | 0       | 0                     | 5.6        |
| 18    | 2      | -1         | -163       | -2         | 180        | 142      | -35      | 168      | DMSO              | 1.88    |                       | 15.1       |

## Torsional parameters.

The parameters for the dihedral  $\omega$  were obtained by fitting a QM torsional profile. QM energies were obtained at the B3LYP/6-311G(d,p) level of theory by optimizing an indoline dimer with frozen  $\omega$  dihedrals. The initial parameters for the torsion were taken from the Amber ff14SB force field, and fitted to the QM torsional profile. The final fit is reported in the figure below.

**Figure:** Final torsional profile obtained at the QM level of theory and at the MM level after fitting the dihedral parameters.

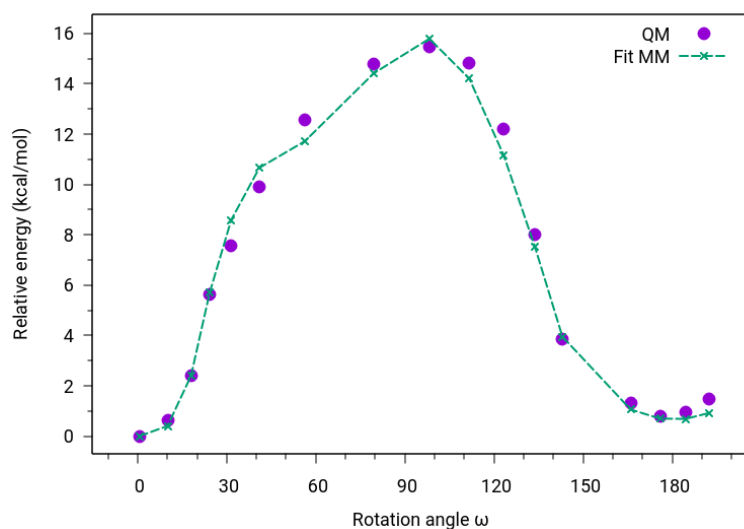

The fitted parameters are reported below in the Amber format:

|          |    |            |         |            |            |         |      |
|----------|----|------------|---------|------------|------------|---------|------|
| CT-C     | -N | -CT        | 1       | 0.33590000 | 180.000    | -1.0    |      |
| CT-C     | -N | -CT        | 1       | 2.78650000 | 180.000    | -2.0    |      |
| CT-C     | -N | -CT        | 1       | 0.23450000 | 0.000      | -3.0    |      |
| CT-C     | -N | -CT        | 1       | 0.71300000 | 180.000    | 6.0     |      |
| CT-C     | -N | -CB        | 1       | 0.55290000 | 180.000    | -1.0    |      |
| CT-C     | -N | -CB        | 1       | 2.30570000 | 180.000    | -2.0    |      |
| CT-C     | -N | -CB        | 1       | 1.18040000 | 0.000      | -3.0    |      |
| CT-C     | -N | -CB        | 1       | 0.20880000 | 0.000      | 6.0     |      |
| O        | -C | -N         | -CB     | 1          | 0.44680000 | 0.000   | -1.0 |
| O        | -C | -N         | -CB     | 1          | 2.40780000 | 180.000 | -2.0 |
| O        | -C | -N         | -CB     | 1          | 1.08870000 | 180.000 | -3.0 |
| O        | -C | -N         | -CB     | 1          | 0.00710000 | 180.000 | 6.0  |
| O        | -C | -N         | -CT     | 1          | 0.43910000 | 0.000   | -1.0 |
| O        | -C | -N         | -CT     | 1          | 2.55570000 | 180.000 | -2.0 |
| O        | -C | -N         | -CT     | 1          | 0.40840000 | 180.000 | -3.0 |
| O-C-N-CT | 1  | 0.19670000 | 180.000 | 6.0        |            |         |      |

### Table S4. Calculated ROE distances along the PBMetaD in DMSO

Calculated distances in all the PBMetaD clusters for the inter-unit ROE interactions shown in **Figure 3** and **Figure SI1**. Distances were calculated for the structures belonging to each cluster in the PBMetaD. Each cluster is assigned the same conformation number as its representative in **Table SI3**. Within each cluster, each “average” distance was calculated by averaging  $1/R^6$ . Distances involving equivalent tBu atoms were averaged in the same way. A NOE violation was detected every time the average distance was above 4 Å.

| Cluster   | Dist.<br>HA $\alpha$ -<br>HB $\alpha$ | Dist.<br>HB $\alpha$ -<br>HC $\alpha$ | Dist.<br>HC $\alpha$ -<br>HD $\alpha$ | Dist.<br>HA $\alpha$ -<br>HD1 | Dist.<br>HA $\beta$ '-<br>HB $\alpha$ | Dist.<br>HB $\beta$ '-<br>HC $\alpha$ | Dist.<br>HC $\beta$ '-<br>HD $\alpha$ | Dist.<br>HC1-<br>tBu | Dist.<br>HB1-<br>tBu | NOE<br>Violations |
|-----------|---------------------------------------|---------------------------------------|---------------------------------------|-------------------------------|---------------------------------------|---------------------------------------|---------------------------------------|----------------------|----------------------|-------------------|
| <b>0</b>  | 2.52                                  | 2.66                                  | 4.49                                  | 6.07                          | 2.52                                  | 2.48                                  | 4.69                                  | 3.82                 | 3.91                 | 3                 |
| <b>1</b>  | 2.45                                  | 2.43                                  | 2.51                                  | 3.68                          | 2.71                                  | 2.54                                  | 2.45                                  | 3.81                 | 3.83                 | 0                 |
| <b>2</b>  | 4.53                                  | 2.09                                  | 4.42                                  | 7.64                          | 4.51                                  | 3.24                                  | 4.65                                  | 11.42                | 7.39                 | 7                 |
| <b>3</b>  | 4.39                                  | 2.43                                  | 2.52                                  | 6.81                          | 4.88                                  | 2.52                                  | 2.43                                  | 8.90                 | 5.06                 | 5                 |
| <b>6</b>  | 3.86                                  | 3.94                                  | 4.48                                  | 5.88                          | 3.45                                  | 3.70                                  | 4.67                                  | 8.90                 | 4.55                 | 5                 |
| <b>7</b>  | 4.54                                  | 2.07                                  | 4.44                                  | 7.51                          | 4.60                                  | 3.56                                  | 4.72                                  | 9.78                 | 5.40                 | 7                 |
| <b>9</b>  | 2.32                                  | 2.54                                  | 4.52                                  | 6.16                          | 2.86                                  | 2.48                                  | 4.76                                  | 4.98                 | 6.81                 | 5                 |
| <b>13</b> | 3.73                                  | 3.84                                  | 4.41                                  | 6.23                          | 3.24                                  | 3.96                                  | 4.85                                  | 8.09                 | 7.14                 | 5                 |
| <b>15</b> | 4.32                                  | 2.52                                  | 3.97                                  | 7.25                          | 5.02                                  | 2.66                                  | 3.64                                  | 8.81                 | 5.75                 | 5                 |
| <b>16</b> | 2.36                                  | 2.44                                  | 2.49                                  | 3.64                          | 2.75                                  | 2.54                                  | 2.48                                  | 5.29                 | 6.20                 | 2                 |
| <b>17</b> | 2.32                                  | 3.90                                  | 4.46                                  | 5.14                          | 3.17                                  | 3.73                                  | 4.71                                  | 6.45                 | 6.01                 | 5                 |
| <b>18</b> | 4.35                                  | 3.91                                  | 4.43                                  | 4.42                          | 4.92                                  | 3.82                                  | 4.71                                  | 8.71                 | 5.49                 | 7                 |

**Figure S1.** Intra-unit Ha-Hb(cis) and inter-unit Ha-Hb'(trans) ROE interactions of 4 shown on the DFT-optimized X-ray structure.

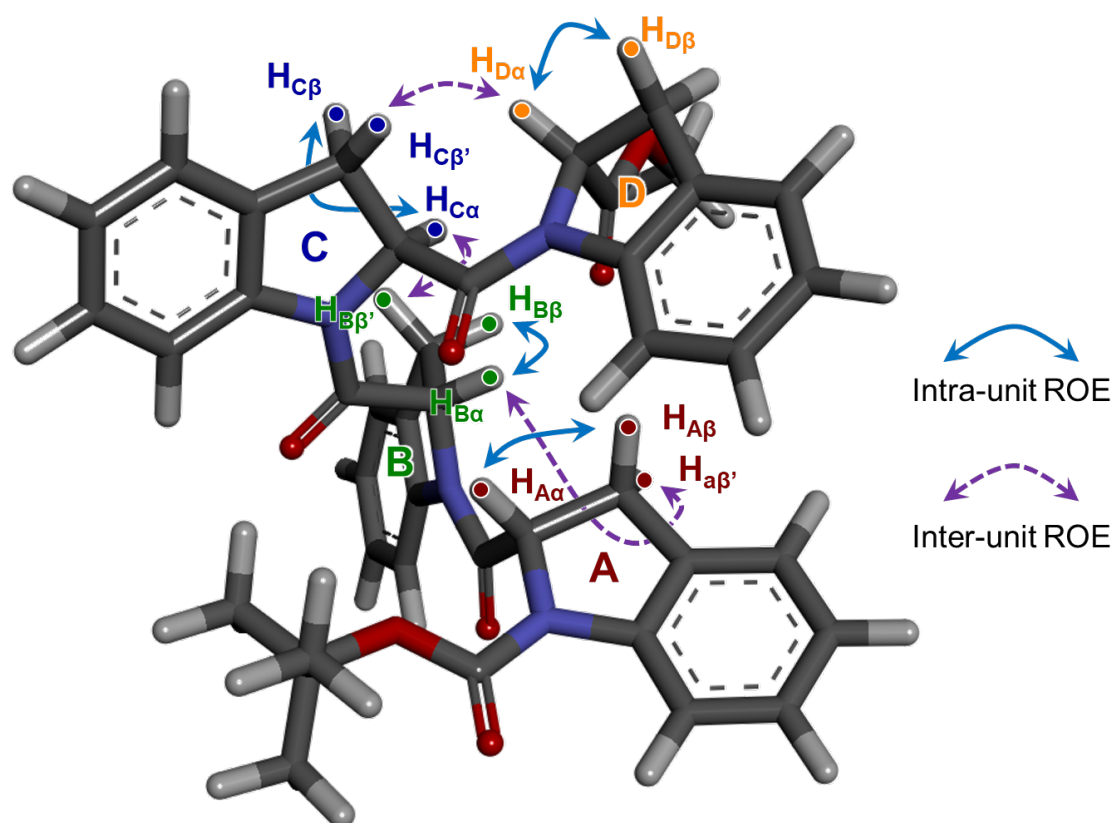

**Figure S2.** Experimental absorption spectra measured for compounds 1-4 in different solvents.

Cell path length 0.02 cm (MeOH), 0.05 cm (MeCN) and 0.2 cm (CHCl<sub>3</sub>).

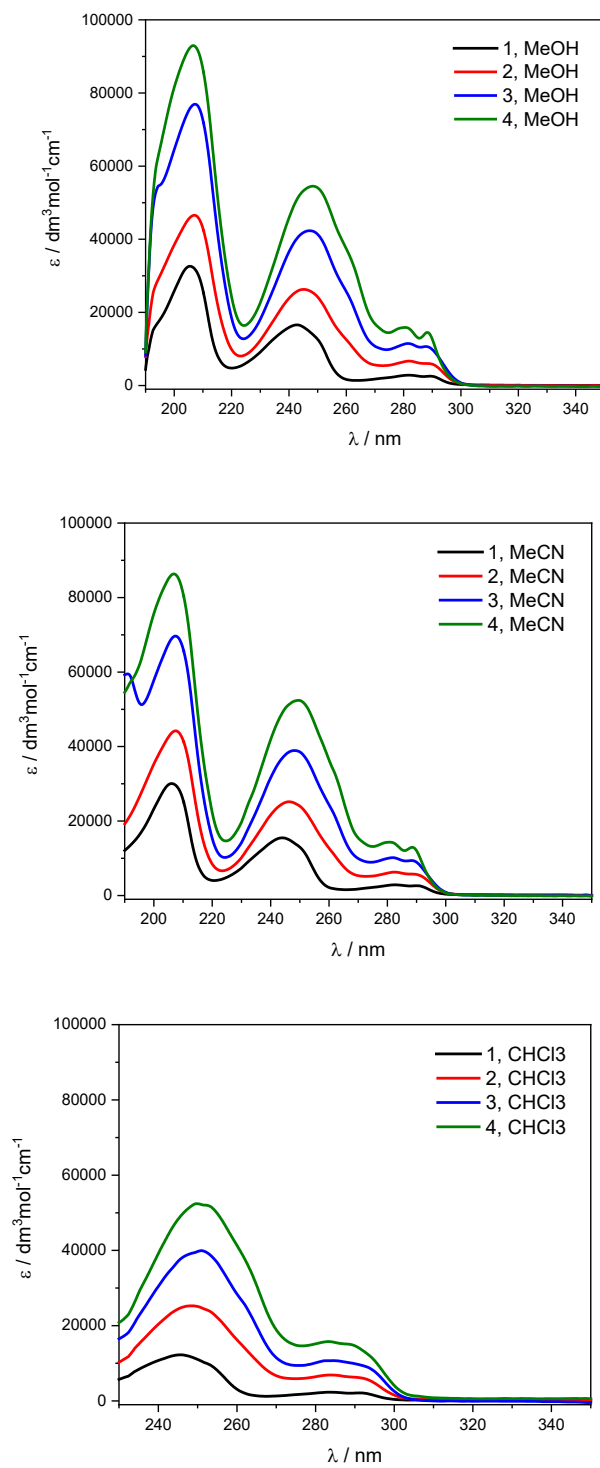

Figure S3. Variable-temperature ECD spectra of **4** measured in MeCN.

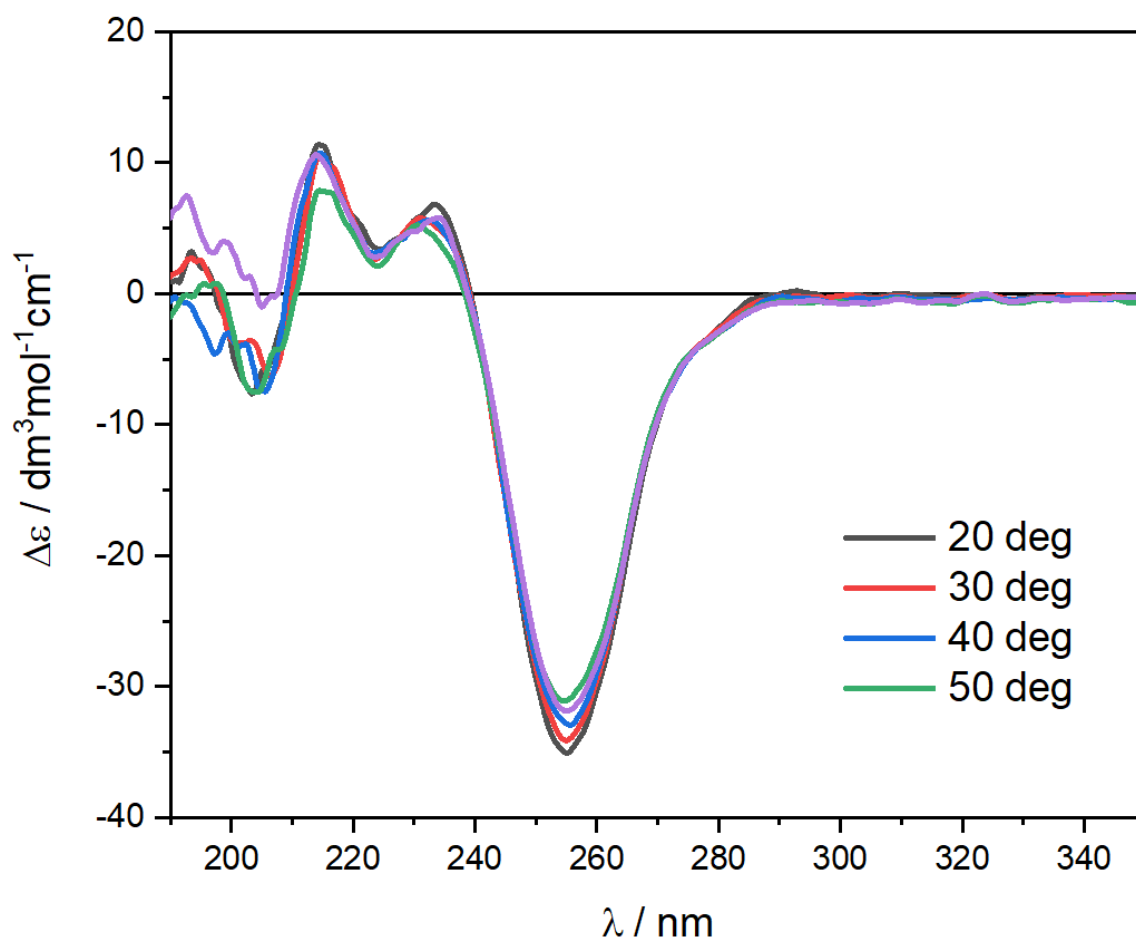

Figure S4. Absorption and ECD spectra of **4** measured in TFE.

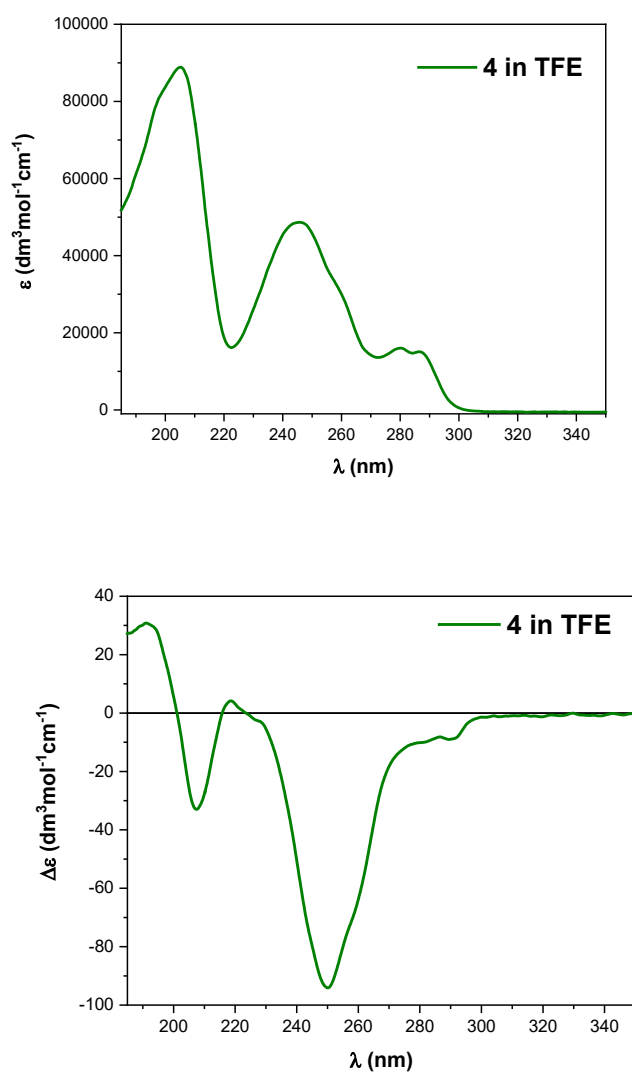

Figure S5. IR (bottom) and VCD (top) spectra of **2** measured in different solvents.

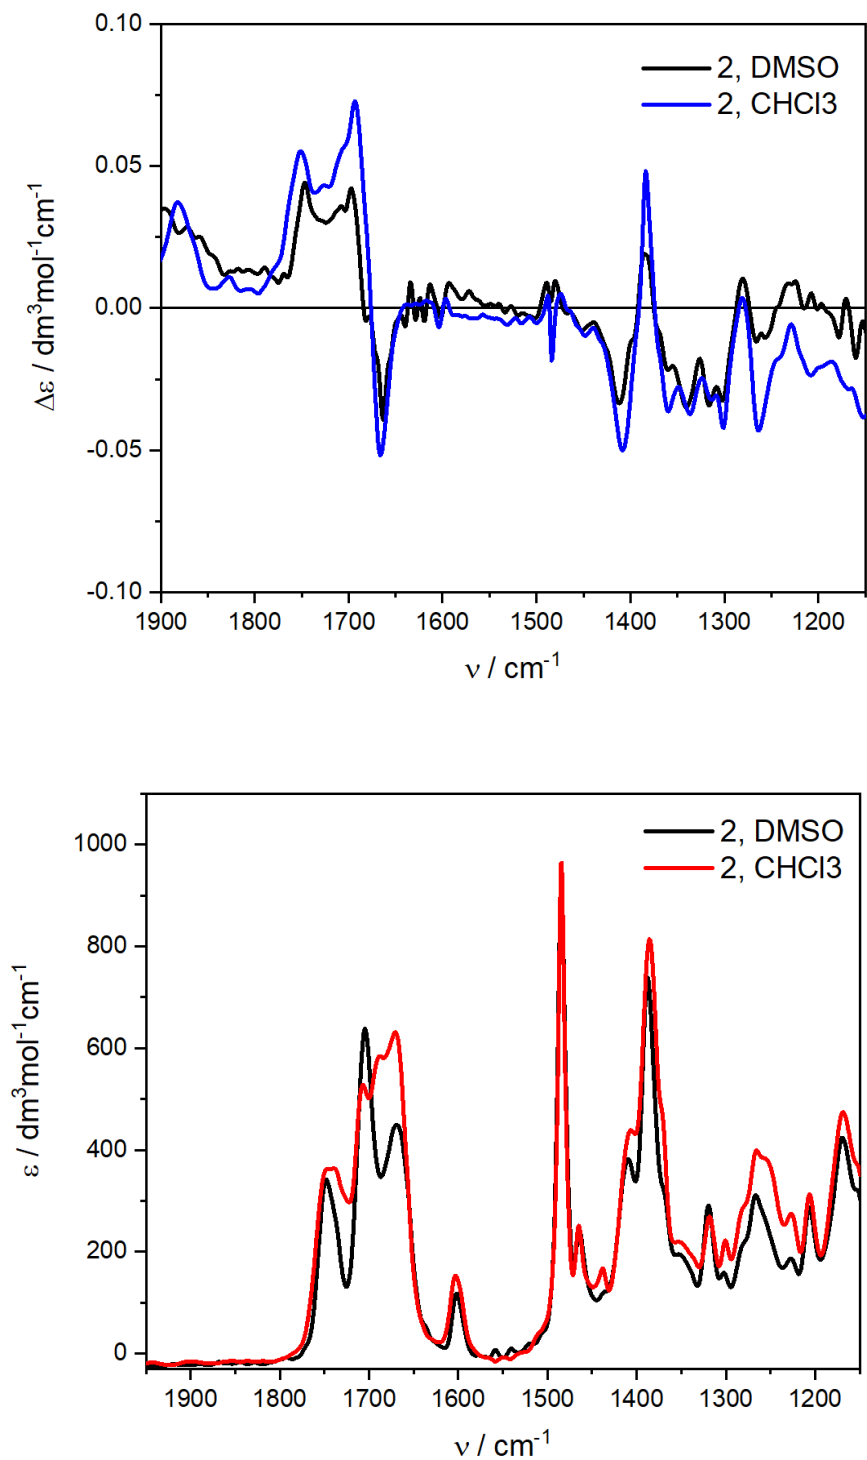



Figure S6. IR (bottom) and VCD (top) spectra of **3** measured in different solvents.

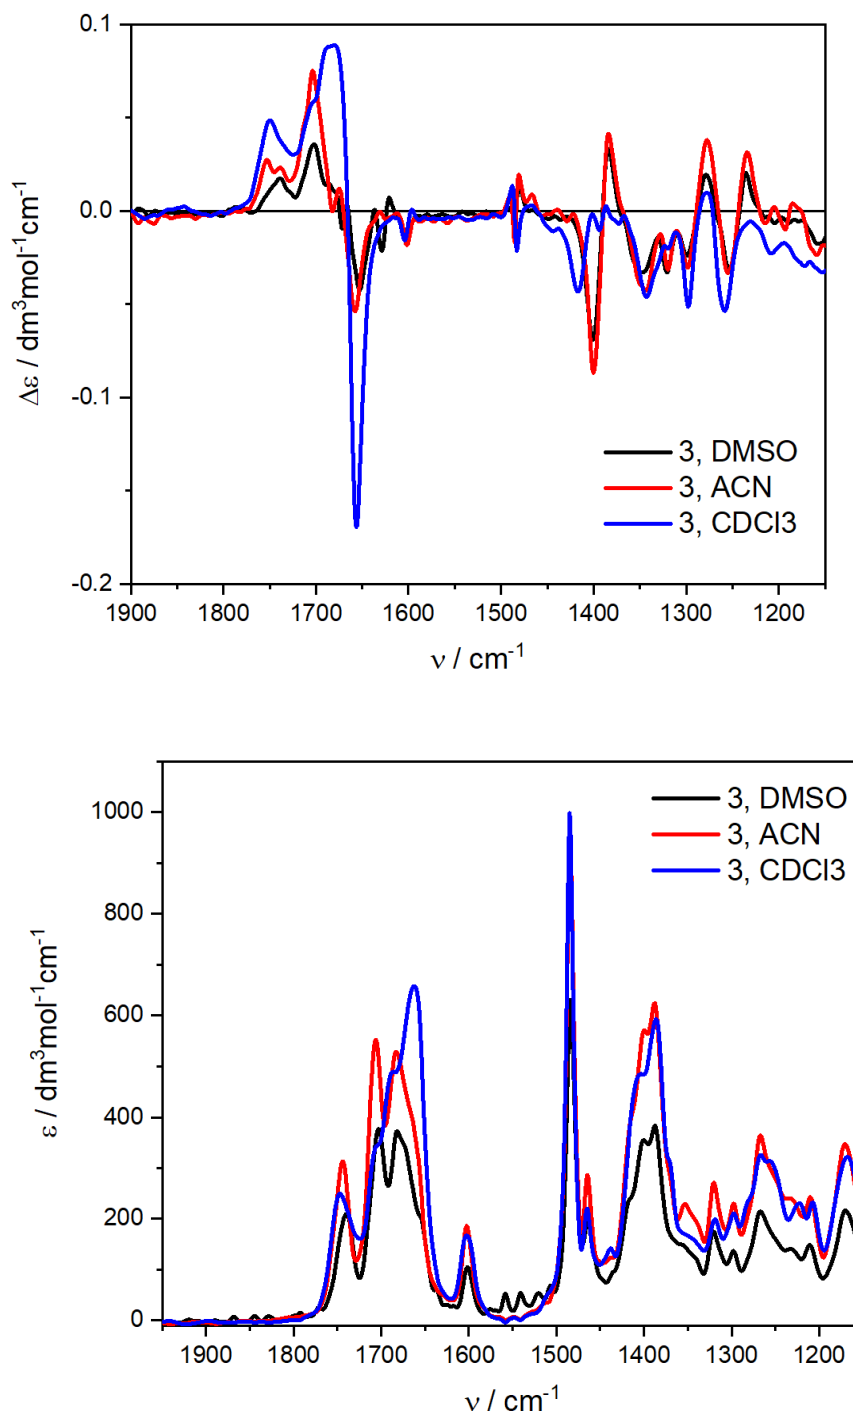

**Figure S7.** Expansion of the VCD spectrum of (**4**) calculated at B3LYP/6-311+G(d,p)/PCM level using the DFT-optimized X-ray structure.

Plotting parameters: band-width, 8 cm<sup>-1</sup>, no shift; vertical blue sticks represent the contributing transitions corresponding to the normal modes show below (same order from left to right). Light-blue arrows are the displacement vectors.

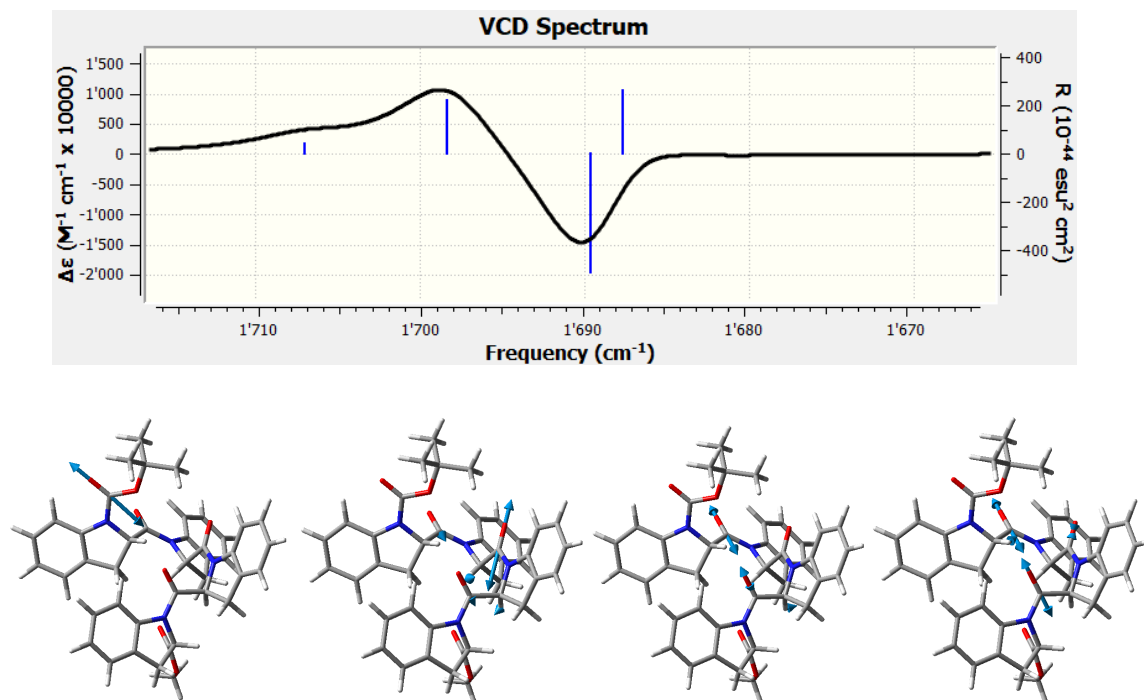

**Figure S8.** Calculated ECD spectra for **4** at TD-CAM-B3LYP/def2-SVP and at TD-CAM-B3LYP/def2-TZVP level using the structure obtained starting from the X-ray geometry.

Plotting parameters: bandwidth, 0.25 eV; wavelength shift, 20 nm; no scaling.

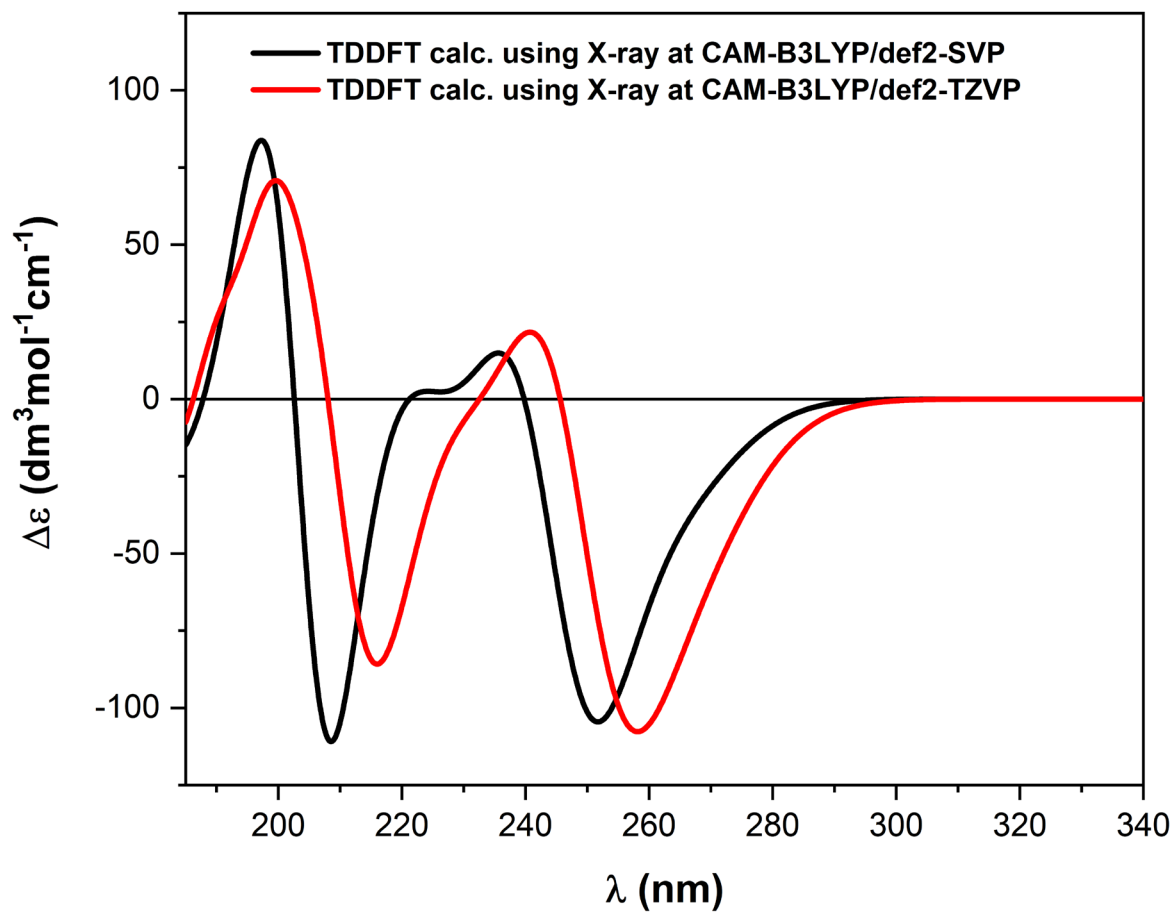

**Figure S9.** Calculated ECD spectra for 4 at TD-CAM-B3LYP/def2-SVP/PCM for MeOH level using the structures obtained starting from the X-ray geometry and MD simulations.

Plotting parameters: bandwidth, 0.25 eV; wavelength shift, 20 nm; no scaling.

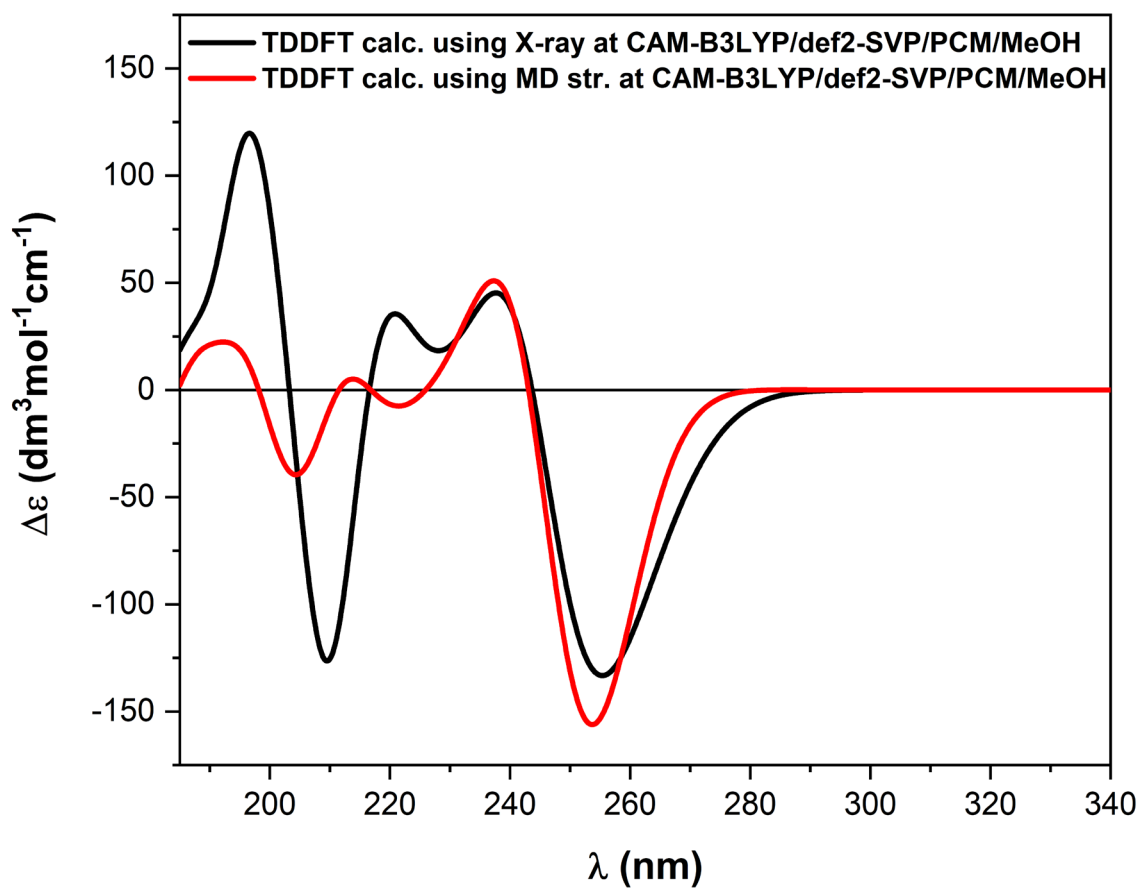

**Figure S10.** Calculated ECD spectra for **4** at TD-B3LYP/def2-SVP level in vacuum and with PCM solvent model for MeOH using the structures obtained starting from the X-ray geometry and MD simulations.

Plotting parameters: bandwidth, 0.25 eV; wavelength shift, 25 nm; no scaling.

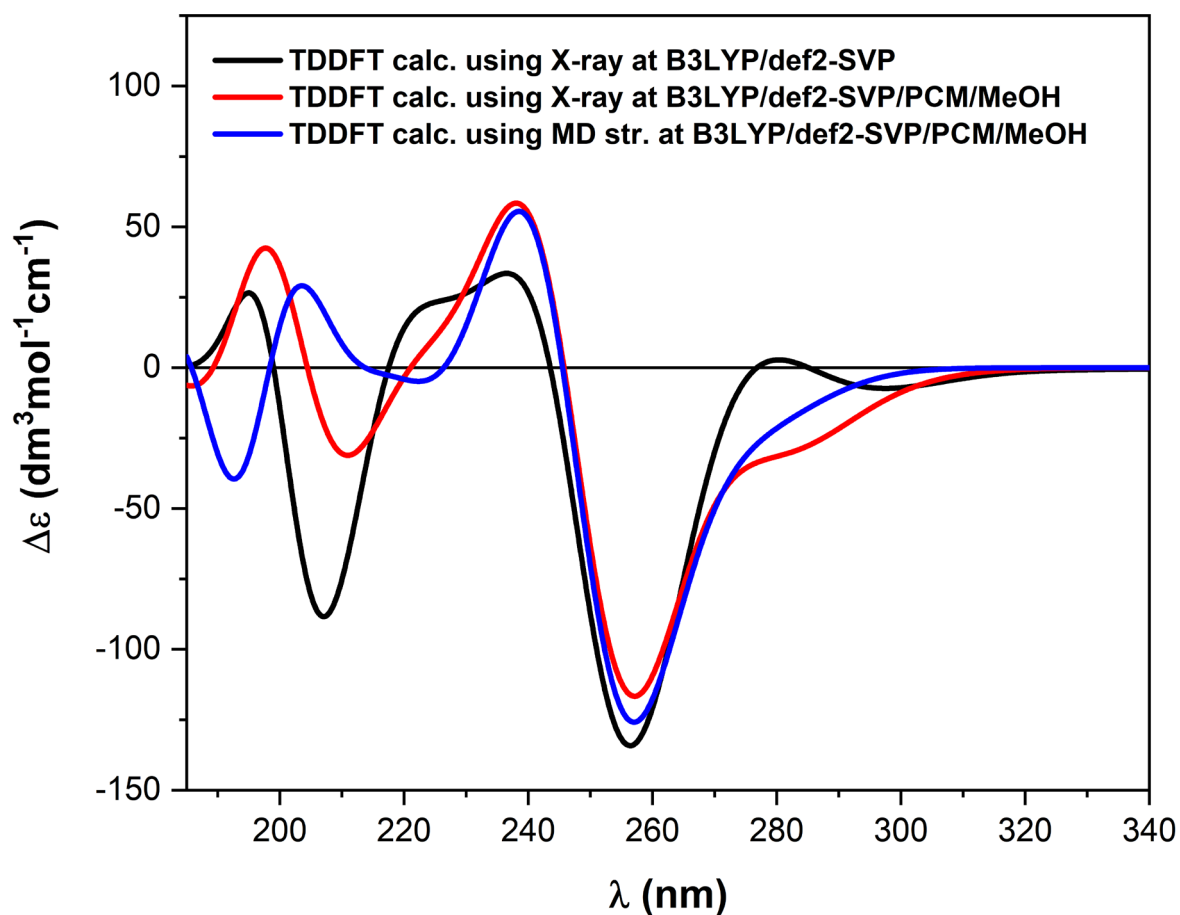

**Figure S11.** Calculated ECD spectrum (TD-CAM-B3LYP/def2-SVP/PCM for MeCN) using the MD-derived structure with band assignment  
 Plotting parameters: bandwidth, 0.25 eV; wavelength shift, 20 nm; no scaling.

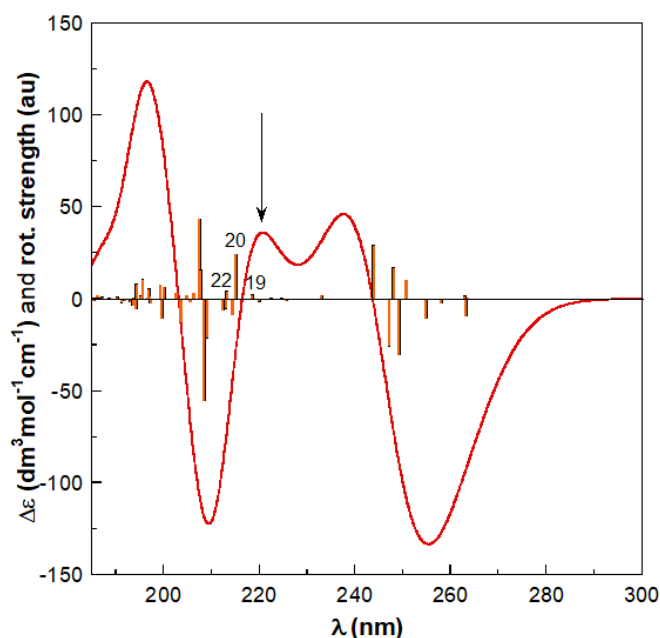

The positive ECD band indicated by the arrow has main contributions from three excited states, for which the major involved single excitations are listed [(occupied MO  $\rightarrow$  virtual MO (coefficient))], and the MO displayed below.

Excited State 19: 186  $\rightarrow$  189 (-0.32), 187  $\rightarrow$  189 (0.55)

Excited State 20: 181  $\rightarrow$  189 (-0.27), 181  $\rightarrow$  192 (0.29), 185  $\rightarrow$  198 (-0.22)

Excited State 22: 188  $\rightarrow$  190 (0.55)

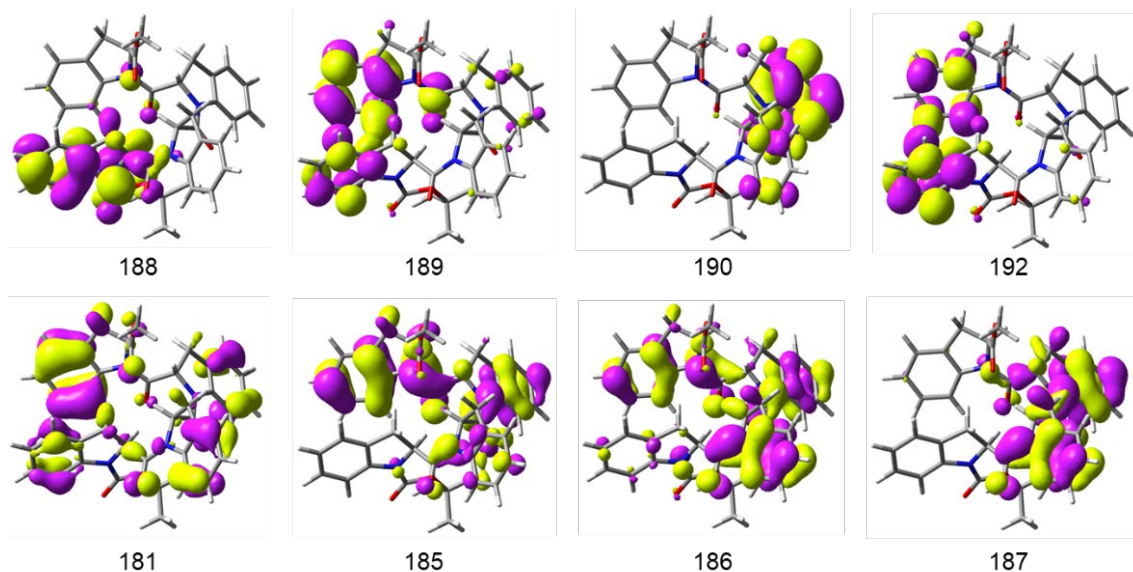

Figure S12. View of the molecular structure of (4). Ellipsoids are represented at 20% probability.

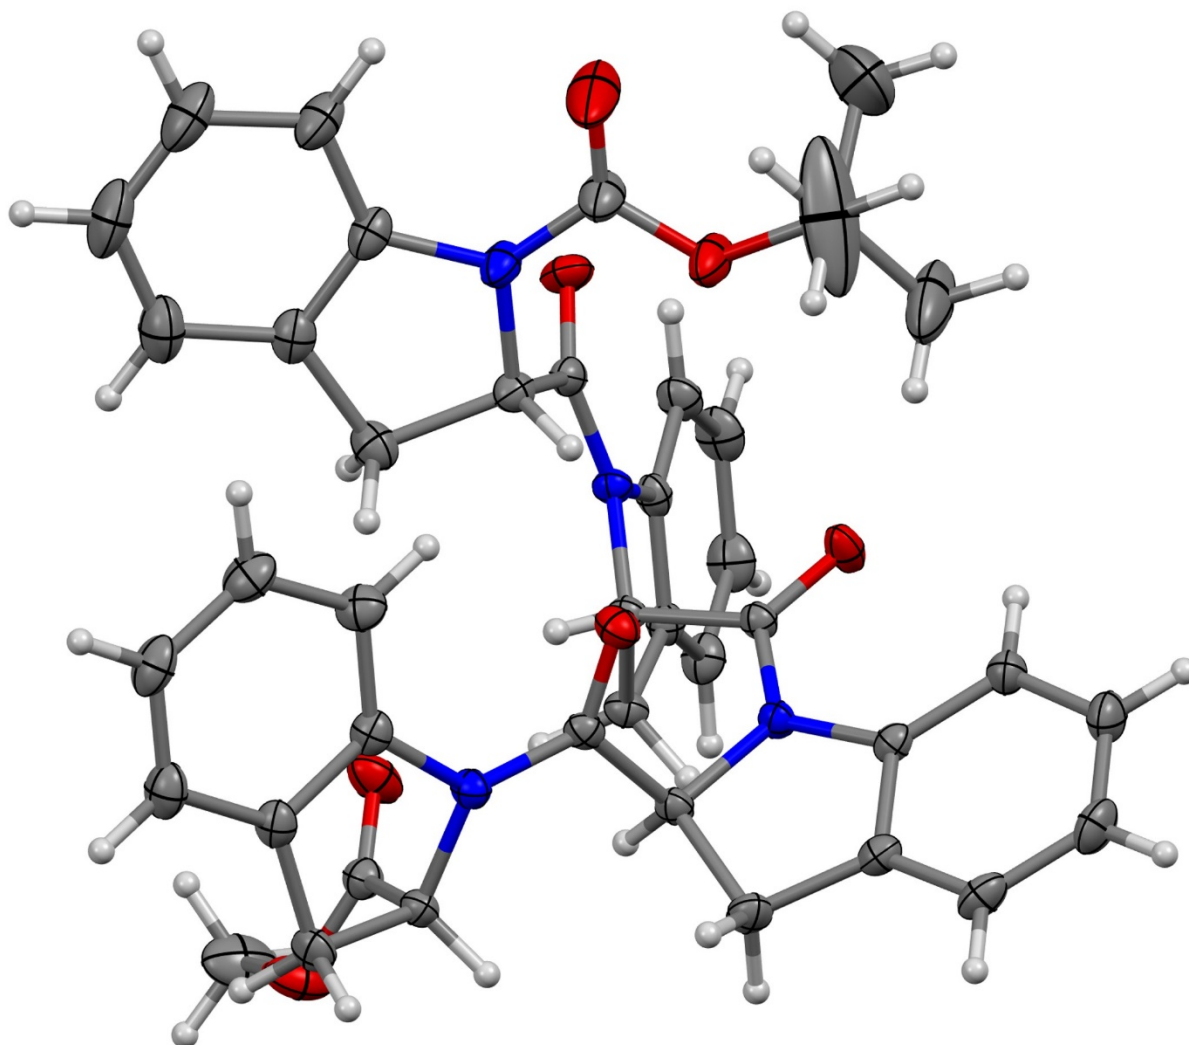

## Coordinates of the DFT-optimized geometries

DFT-optimized X-ray structure (4)

B3LYP-D3/6-311+G(d,p)/IEFPCM(DMSO)

E=-2370.883667, no imaginary freq

| Symbol | X         | Y         | Z         |
|--------|-----------|-----------|-----------|
| C      | -0.370965 | 4.483148  | 3.712077  |
| H      | -0.266642 | 5.496894  | 4.086986  |
| H      | 0.520492  | 3.896067  | 3.928692  |
| H      | -1.249892 | 4.001053  | 4.137888  |
| O      | -0.532356 | 4.621826  | 2.277962  |
| O      | -0.662850 | 2.385398  | 2.059404  |
| C      | -0.676727 | 3.497688  | 1.583538  |
| C      | -0.861835 | 3.813001  | 0.099055  |
| H      | -0.047542 | 4.461995  | -0.215654 |
| N      | -0.905961 | 2.579479  | -0.709796 |
| C      | -2.238280 | 4.484971  | -0.159419 |
| H      | -2.631877 | 4.955418  | 0.740310  |
| H      | -2.134967 | 5.259778  | -0.922961 |
| C      | -3.078610 | 3.340644  | -0.662949 |
| C      | -4.454195 | 3.247014  | -0.804498 |
| H      | -5.092595 | 4.073058  | -0.513449 |
| C      | -5.004460 | 2.069424  | -1.321521 |
| H      | -6.078697 | 1.977100  | -1.425930 |
| C      | -4.175944 | 1.013226  | -1.696036 |
| H      | -4.608321 | 0.098536  | -2.082972 |
| C      | -2.787927 | 1.098367  | -1.564565 |
| H      | -2.151647 | 0.278404  | -1.852756 |
| C      | -2.258848 | 2.271028  | -1.032074 |
| C      | 0.168437  | 1.813624  | -1.046418 |
| O      | 0.075306  | 0.821427  | -1.758982 |
| C      | 1.535483  | 2.240705  | -0.482032 |
| H      | 1.445801  | 2.568779  | 0.549222  |
| N      | 2.469956  | 1.100414  | -0.566598 |
| C      | 2.187826  | 3.341517  | -1.363765 |
| H      | 1.451199  | 3.861658  | -1.977419 |
| H      | 2.684124  | 4.085432  | -0.735929 |
| C      | 3.183928  | 2.569507  | -2.187856 |
| C      | 3.916042  | 2.982013  | -3.289253 |
| H      | 3.791318  | 3.982733  | -3.686689 |
| C      | 4.816419  | 2.088297  | -3.878497 |
| H      | 5.394241  | 2.394351  | -4.742216 |
| C      | 4.968461  | 0.804549  | -3.356460 |
| H      | 5.665495  | 0.115652  | -3.819132 |
| C      | 4.233377  | 0.376890  | -2.246581 |
| H      | 4.344389  | -0.618053 | -1.849090 |
| C      | 3.339016  | 1.278648  | -1.674581 |
| C      | 2.393238  | -0.028766 | 0.200932  |
| O      | 3.112501  | -1.001157 | 0.022883  |
| C      | 1.422432  | 0.014153  | 1.396303  |
| H      | 0.524086  | 0.583852  | 1.193323  |
| N      | 1.084510  | -1.363281 | 1.812182  |
| C      | 2.162744  | 0.602516  | 2.628504  |
| H      | 2.979261  | 1.263989  | 2.336535  |



|   |           |           |           |
|---|-----------|-----------|-----------|
| H | 1.463038  | 1.180284  | 3.237258  |
| C | 2.629306  | -0.634115 | 3.352866  |
| C | 3.545875  | -0.762600 | 4.383033  |
| H | 4.067407  | 0.107532  | 4.765155  |
| C | 3.787412  | -2.031402 | 4.922898  |
| H | 4.504552  | -2.148401 | 5.726511  |
| C | 3.110160  | -3.143736 | 4.425983  |
| H | 3.305434  | -4.123452 | 4.846235  |
| C | 2.183636  | -3.026372 | 3.383989  |
| H | 1.663256  | -3.886798 | 2.995089  |
| C | 1.957229  | -1.757828 | 2.859292  |
| C | 0.045656  | -2.108444 | 1.326449  |
| O | -0.146974 | -3.272518 | 1.652827  |
| C | -0.940712 | -1.348098 | 0.436652  |
| H | -0.410517 | -0.717258 | -0.268724 |
| C | -1.926369 | -0.533611 | 1.331007  |
| H | -1.645286 | -0.590614 | 2.384686  |
| H | -1.924240 | 0.520481  | 1.060225  |
| C | -3.262230 | -1.172798 | 1.069195  |
| C | -4.496675 | -0.867391 | 1.617434  |
| H | -4.584394 | -0.085116 | 2.362992  |
| C | -5.627242 | -1.570474 | 1.187736  |
| H | -6.599795 | -1.339743 | 1.605728  |
| C | -5.501223 | -2.565239 | 0.219013  |
| H | -6.379704 | -3.107100 | -0.112116 |
| C | -4.259857 | -2.884194 | -0.340889 |
| H | -4.162815 | -3.650722 | -1.093206 |
| C | -3.145773 | -2.172820 | 0.099071  |
| N | -1.802884 | -2.267694 | -0.321032 |
| C | -1.343398 | -3.034739 | -1.359510 |
| O | -0.045702 | -2.772702 | -1.579723 |
| O | -2.033201 | -3.824505 | -1.983266 |
| C | 0.700714  | -3.415591 | -2.687774 |
| C | 2.066489  | -2.745796 | -2.594429 |
| H | 2.507191  | -2.895122 | -1.608756 |
| H | 2.732711  | -3.167284 | -3.350242 |
| H | 1.979885  | -1.671869 | -2.766219 |
| C | 0.804606  | -4.915681 | -2.425468 |
| H | 1.243745  | -5.097266 | -1.441789 |
| H | -0.172154 | -5.394468 | -2.474353 |
| H | 1.454224  | -5.367696 | -3.178885 |
| C | 0.036826  | -3.091678 | -4.024859 |
| H | 0.692480  | -3.422680 | -4.833787 |
| H | -0.925550 | -3.588634 | -4.127734 |
| H | -0.105085 | -2.012706 | -4.122527 |

DFT-optimized MD all-cis conformer (**4**)

B3LYP-D3/6-311+G(d,p)/IEFPCM(DMSO)

E=-2370.883667, no imaginary freq

| Symbol | X         | Y         | Z        |
|--------|-----------|-----------|----------|
| C      | -1.128977 | -3.285328 | 4.403830 |
| C      | -3.333840 | -1.928323 | 3.276140 |
| C      | -2.419264 | -3.493610 | 4.903839 |
| C      | -0.949939 | -2.404124 | 3.348600 |
| C      | -2.042373 | -1.732894 | 2.789088 |

|   |           |           |           |
|---|-----------|-----------|-----------|
| C | -3.502402 | -2.818684 | 4.342321  |
| N | -1.593052 | -0.899406 | 1.725781  |
| C | -0.198990 | -1.259872 | 1.381706  |
| C | 0.322017  | -1.981497 | 2.659546  |
| C | -0.182804 | -2.236188 | 0.181881  |
| O | -1.190240 | -2.855722 | -0.129541 |
| C | -2.335969 | 0.095536  | 1.144818  |
| O | -3.510195 | 0.288730  | 1.432553  |
| N | 1.022374  | -2.424088 | -0.442349 |
| C | 1.262700  | -3.369339 | -1.479618 |
| C | 2.631136  | -3.418027 | -1.760566 |
| C | 3.383541  | -2.488472 | -0.845237 |
| C | 2.252190  | -1.641858 | -0.188632 |
| C | 3.120860  | -4.263699 | -2.744437 |
| C | 2.225465  | -5.072956 | -3.451317 |
| C | 0.862264  | -5.022392 | -3.162067 |
| C | 0.357002  | -4.171180 | -2.173886 |
| C | 2.138156  | -0.243265 | -0.844015 |
| O | 1.228200  | 0.007222  | -1.624460 |
| N | 3.118693  | 0.659072  | -0.537395 |
| C | 3.257735  | 1.951512  | -1.126470 |
| C | 4.473992  | 2.516070  | -0.727468 |
| C | 5.234449  | 1.547371  | 0.140656  |
| C | 4.157450  | 0.491244  | 0.501857  |
| C | 4.838822  | 3.780066  | -1.166188 |
| C | 3.975293  | 4.480304  | -2.014951 |
| C | 2.767707  | 3.907048  | -2.411796 |
| C | 2.387145  | 2.633843  | -1.975155 |
| C | 3.563085  | 0.702130  | 1.903642  |
| O | 2.384812  | 0.844795  | 2.138339  |
| O | 4.522787  | 0.667077  | 2.825430  |
| C | 4.113977  | 0.821074  | 4.208421  |
| C | -1.594356 | 1.032791  | 0.165134  |
| N | -2.562058 | 1.883486  | -0.552453 |
| C | -2.604830 | 3.175767  | 0.023226  |
| C | -1.549617 | 3.312543  | 0.932592  |
| C | -0.713876 | 2.057909  | 0.943292  |
| C | -1.377310 | 4.492357  | 1.639797  |
| C | -2.270631 | 5.549704  | 1.430918  |
| C | -3.315644 | 5.407070  | 0.518879  |
| C | -3.501388 | 4.220357  | -0.199150 |
| C | -3.376667 | 1.445167  | -1.568484 |
| O | -4.228179 | 2.139086  | -2.099444 |
| O | -3.084889 | 0.173951  | -1.892653 |
| C | -3.813944 | -0.539622 | -2.978576 |
| C | -3.617276 | 0.185642  | -4.311297 |
| C | -3.121323 | -1.900388 | -3.004485 |
| C | -5.287815 | -0.687691 | -2.597986 |
| H | -0.280476 | -3.804817 | 4.835448  |
| H | -4.174792 | -1.411285 | 2.842819  |
| H | -2.575888 | -4.181873 | 5.726245  |
| H | -4.500389 | -2.986428 | 4.731396  |
| H | 0.387596  | -0.367655 | 1.183764  |
| H | 0.892503  | -1.281842 | 3.276598  |
| H | 0.974529  | -2.822365 | 2.419809  |
| H | 4.102281  | -1.866785 | -1.381083 |
| H | 3.931351  | -3.047588 | -0.081458 |

|   |           |           |           |
|---|-----------|-----------|-----------|
| H | 2.414643  | -1.543908 | 0.881684  |
| H | 4.183048  | -4.297617 | -2.960227 |
| H | 2.592040  | -5.737946 | -4.224523 |
| H | 0.172170  | -5.650307 | -3.714234 |
| H | -0.697958 | -4.131981 | -1.957149 |
| H | 6.046824  | 1.076306  | -0.419571 |
| H | 5.667044  | 2.001528  | 1.030850  |
| H | 4.584284  | -0.510382 | 0.481699  |
| H | 5.781820  | 4.216948  | -0.857069 |
| H | 4.245755  | 5.470054  | -2.363769 |
| H | 2.102680  | 4.455211  | -3.069362 |
| H | 1.452624  | 2.194600  | -2.284724 |
| H | 3.428518  | 0.020883  | 4.485158  |
| H | 3.635979  | 1.789845  | 4.348709  |
| H | 5.031958  | 0.758214  | 4.785783  |
| H | -1.008414 | 0.460242  | -0.550575 |
| H | -0.476174 | 1.717832  | 1.951802  |
| H | 0.233200  | 2.215792  | 0.420855  |
| H | -0.559021 | 4.594500  | 2.344403  |
| H | -2.149726 | 6.477173  | 1.978446  |
| H | -4.006420 | 6.227789  | 0.360466  |
| H | -4.312904 | 4.113600  | -0.901676 |
| H | -2.553175 | 0.340485  | -4.506984 |
| H | -4.021238 | -0.435420 | -5.115016 |
| H | -4.125326 | 1.148063  | -4.326133 |
| H | -3.192885 | -2.393883 | -2.034096 |
| H | -3.593649 | -2.535238 | -3.757664 |
| H | -2.064915 | -1.790952 | -3.258377 |
| H | -5.383313 | -1.169761 | -1.621967 |
| H | -5.792498 | 0.276894  | -2.569535 |
| H | -5.786260 | -1.319057 | -3.338037 |

## Structures and energies of the optimized clusters

clu\_000

B3LYP-D3(BJ)/6-311+G(d,p)/IEFPCM(DMSO)

E= -2371.121968, no imaginary freq

|   |           |           |           |
|---|-----------|-----------|-----------|
| O | 0.354227  | 0.858419  | 2.517590  |
| C | 0.676269  | 0.048572  | 3.720222  |
| C | H.092091  | 0.979713  | 4.854710  |
| H | 0.258476  | 1.599307  | 5.182398  |
| H | 1.437305  | 0.381259  | 5.701255  |
| H | 1.913427  | 1.624879  | 4.534156  |
| C | -0.512491 | -0.840097 | 4.081003  |
| H | -1.346550 | -0.258290 | 4.468851  |
| H | -0.838976 | -1.397053 | 3.201723  |
| H | -0.196966 | -1.552144 | 4.847498  |
| C | H.846995  | -0.796850 | 3.233130  |
| H | 2.203053  | -1.431671 | 4.047428  |
| H | 1.533939  | -1.427682 | 2.401503  |
| H | 2.669288  | -0.163720 | 2.896567  |
| C | -0.714855 | H.659784  | 2.469142  |
| O | -1.462740 | H.931601  | 3.392083  |
| N | -0.867860 | 2.142346  | H.189336  |
| C | -2.002164 | 2.823402  | 0.699232  |
| C | -1.916007 | 2.939828  | -0.691752 |
| C | -0.630267 | 2.339014  | -1.192002 |
| H | 0.011542  | 3.097590  | -1.646092 |
| H | -0.808006 | 1.575125  | -1.949211 |
| C | -2.943871 | 3.522430  | -1.414473 |
| H | -2.880176 | 3.594385  | -2.493860 |
| C | -4.070858 | 3.994282  | -0.733986 |
| C | -4.145338 | 3.879714  | 0.653998  |
| C | -3.113453 | 3.294682  | H.394626  |
| H | -3.176428 | 3.195076  | 2.466452  |
| H | -5.021869 | 4.244884  | 1.176263  |
| H | -4.887130 | 4.444077  | -1.285853 |
| C | 0.028010  | H.748343  | 0.092752  |
| H | 0.072531  | 0.664731  | 0.069829  |
| C | H.437491  | 2.316423  | 0.272213  |
| O | H.645406  | 3.318015  | 0.942289  |
| N | 2.411152  | H.680828  | -0.445246 |
| C | 3.723992  | 2.180191  | -0.658927 |
| C | 4.277067  | H.570740  | -1.789196 |
| C | 3.276796  | 0.628176  | -2.407994 |
| H | 3.704827  | -0.335526 | -2.684773 |
| H | 2.826114  | 1.064487  | -3.303350 |
| C | 5.562321  | H.887951  | -2.195498 |
| H | 5.994317  | 1.415649  | -3.070281 |
| C | 6.294718  | 2.826319  | -1.458623 |
| C | 5.732221  | 3.428756  | -0.334557 |
| C | 4.435115  | 3.114419  | 0.085853  |

|   |           |           |           |
|---|-----------|-----------|-----------|
| H | 4.000013  | 3.575919  | 0.957934  |
| H | C.307653  | 4.150781  | 0.232856  |
| H | N.303038  | 3.081651  | -1.761653 |
| C | 2.205212  | 0.483202  | -1.291596 |
| H | 1.212357  | 0.493790  | -1.718724 |
| C | 2.513615  | -0.796116 | -0.491466 |
| O | 3.476256  | -0.814307 | 0.262694  |
| N | H.763184  | -1.906619 | -0.757400 |
| C | 2.053929  | -3.219123 | -0.293876 |
| C | H.213815  | -4.133193 | -0.938919 |
| C | 0.324603  | -3.413413 | -1.920585 |
| H | -0.712888 | -3.747306 | -1.890197 |
| H | 0.688888  | -3.537516 | -2.944153 |
| C | H.297141  | -5.485504 | -0.653434 |
| H | 0.644065  | -6.192773 | -1.151376 |
| C | 2.235590  | -5.922638 | 0.288198  |
| C | 3.070022  | -5.004305 | 0.923121  |
| C | 2.993190  | -3.635595 | 0.644440  |
| H | 3.629593  | -2.923643 | 1.143500  |
| H | 3.790365  | -5.350024 | 1.655231  |
| H | 2.309816  | -6.976815 | 0.526499  |
| C | 0.470125  | -1.935551 | -1.472539 |
| H | 0.487522  | -1.259406 | -2.317853 |
| C | -0.648084 | -1.588866 | -0.479186 |
| O | -0.480726 | -1.757714 | 0.723849  |
| N | -1.834063 | -1.090966 | -0.935816 |
| C | -2.323830 | -0.781860 | -2.233007 |
| C | -3.527254 | -0.076349 | -2.113568 |
| C | -3.937171 | 0.052997  | -0.671442 |
| H | -4.913147 | -0.403534 | -0.495168 |
| H | -3.999003 | 1.093048  | -0.352582 |
| C | -4.187650 | 0.383788  | -3.241077 |
| H | -5.113159 | 0.938261  | -3.140004 |
| C | -3.650171 | 0.120247  | -4.503596 |
| C | -2.474761 | -0.618418 | -4.617765 |
| C | -1.800318 | -1.087685 | -3.487389 |
| H | -0.913831 | -1.685586 | -3.623306 |
| H | -2.072096 | -0.846704 | -5.597072 |
| H | -4.155479 | 0.475777  | -5.393062 |
| C | -2.813516 | -0.691192 | 0.095672  |
| H | -2.325484 | -0.045574 | 0.820646  |
| C | -3.336492 | -1.911643 | 0.837206  |
| O | -3.436773 | -3.020212 | 0.365951  |
| O | -3.719253 | -1.567582 | 2.068255  |
| C | -4.290611 | -2.614308 | 2.886313  |
| H | -5.182748 | -3.018853 | 2.409097  |
| H | -4.541526 | -2.137388 | 3.829453  |
| H | -3.557749 | -3.405967 | 3.039346  |

clu\_001

B3LYP-D3(BJ)/6-311+G(d,p)/IEFPCM(DMSO)

E= -2371.125946 , no imaginary freq

|   |           |           |           |
|---|-----------|-----------|-----------|
| O | 0.463418  | 2.375947  | -1.913068 |
| C | -0.159562 | 2.633329  | -3.234188 |
| C | 0.497271  | H.748631  | -4.292166 |
| H | -0.072574 | 1.825847  | -5.221117 |
| H | 1.524808  | 2.049729  | -4.488302 |
| H | 0.481656  | 0.706521  | -3.965515 |
| C | -1.602195 | 2.201220  | -3.003868 |
| H | -1.639463 | 1.145902  | -2.734721 |
| H | -2.057008 | 2.776055  | -2.196575 |
| H | -2.181443 | 2.356260  | -3.916758 |
| C | -0.069683 | 4.120946  | -3.561644 |
| H | 0.962767  | 4.430776  | -3.714517 |
| H | -0.636536 | 4.322037  | -4.474019 |
| H | -0.504369 | 4.712434  | -2.752360 |
| C | H.787447  | 2.485575  | -1.727960 |
| O | 2.582171  | 2.998972  | -2.498618 |
| N | 2.134877  | H.922618  | -0.527616 |
| C | 3.450791  | H.760083  | -0.047307 |
| C | 3.441439  | 0.905875  | H.059608  |
| C | 2.041727  | 0.437951  | H.351471  |
| H | 1.745678  | 0.637920  | 2.382992  |
| H | 1.936190  | -0.633955 | 1.193335  |
| C | 4.625046  | 0.571039  | H.696312  |
| H | 4.616313  | -0.097799 | 2.549577  |
| C | 5.829976  | H.097399  | 1.217609  |
| C | 5.828158  | H.949423  | 0.113905  |
| C | 4.639469  | 2.295786  | -0.536661 |
| H | 4.638303  | 2.949190  | -1.394619 |
| H | C.763904  | 2.355157  | -0.253110 |
| H | C.763571  | 0.841986  | 1.704419  |
| C | H.164597  | 1.240638  | 0.341946  |
| H | 0.550403  | 0.596227  | -0.276219 |
| C | 0.294533  | 2.242656  | H.105625  |
| O | 0.654661  | 3.398846  | H.286056  |
| N | -0.842551 | H.725216  | 1.663045  |
| C | -1.631021 | 2.362717  | 2.656483  |
| C | -2.451185 | H.414138  | 3.277959  |
| C | -2.182383 | 0.047519  | 2.701691  |
| H | -3.090611 | -0.519436 | 2.493527  |
| H | -1.558224 | -0.550302 | 3.370372  |
| C | -3.320771 | H.793687  | 4.286625  |
| H | -3.957276 | 1.059639  | 4.767425  |
| C | -3.364160 | 3.137692  | 4.676025  |
| C | -2.540082 | 4.073595  | 4.053372  |
| C | -1.659548 | 3.702194  | 3.031155  |
| H | -1.025968 | 4.426152  | 2.544576  |
| H | -2.582153 | 5.112969  | 4.357542  |
| H | -4.042234 | 3.450554  | 5.460942  |
| C | -1.393670 | 0.378591  | H.405359  |
| H | -0.597037 | -0.339580 | 1.258092  |

C -2.383998 0.441128 0.226003  
O -2.961010 H.484971 -0.041778  
N -2.650630 -0.739320 -0.411203  
C -3.586101 -0.909098 -1.464743  
C -3.619944 -2.252622 -1.849024  
C -2.693622 -3.066481 -0.984543  
H -2.052866 -3.730366 -1.566397  
H -3.252340 -3.680420 -0.274240  
C -4.450194 -2.670222 -2.876517  
H -4.471709 -3.712120 -3.174723  
C -5.259068 -1.728133 -3.520415  
C -5.224558 -0.391624 -3.124988  
C -4.388186 0.041519 -2.091823  
H -4.352486 1.076229 -1.794613  
H -5.852019 0.334052 -3.629165  
H -5.911703 -2.038199 -4.327572  
C -1.873747 -1.982505 -0.231732  
H -1.795434 -2.216807 0.825499  
C -0.481622 -1.799049 -0.862072  
O -0.286473 -0.913157 -1.684937  
N 0.500237 -2.649361 -0.451053  
C H.873266 -2.538903 -0.812351  
C 2.571823 -3.646995 -0.326719  
C H.614978 -4.626251 0.301151  
H 1.964837 -5.032861 1.249024  
H 1.418334 -5.466265 -0.369262  
C 3.947440 -3.725762 -0.476991  
H 4.492224 -4.581278 -0.095052  
C 4.620504 -2.682889 -1.122174  
C 3.910890 -1.589755 -1.616439  
C 2.523685 -1.502811 -1.477411  
H 1.978152 -0.657590 -1.861434  
H 4.437897 -0.780993 -2.107824  
H 5.696955 -2.724851 -1.235641  
C 0.323198 -3.780575 0.480498  
H -0.560856 -4.362410 0.229381  
C 0.192071 -3.301976 H.925604  
O 0.356991 -2.162428 2.296905  
O -0.122354 -4.320780 2.719618  
C -0.247797 -4.027317 4.133834  
H -1.035746 -3.291742 4.289931  
H 0.698850 -3.650142 4.518390  
H -0.504817 -4.973717 4.600113

clu\_002

B3LYP-D3(BJ)/6-311+G(d,p)/IEFPCM(DMSO)

E= -2371.119179, no imaginary freq

O -3.799416 -1.603324 0.318145  
C -4.527606 -1.601683 H.612705  
C -5.598541 -0.540699 H.377938  
H -5.138884 0.426006 1.164989

|   |           |           |           |
|---|-----------|-----------|-----------|
| H | -6.241188 | -0.819911 | 0.540311  |
| H | -6.217261 | -0.440514 | 2.271808  |
| C | -5.154389 | -2.971453 | H.854037  |
| H | -5.772465 | -3.261856 | 1.001193  |
| H | -4.391943 | -3.730997 | 2.017267  |
| H | -5.794593 | -2.920298 | 2.738002  |
| C | -3.580656 | -1.173977 | 2.731269  |
| H | -3.090909 | -0.232938 | 2.476070  |
| H | -4.159691 | -1.017197 | 3.644140  |
| H | -2.823480 | -1.931573 | 2.923564  |
| C | -2.699390 | -2.335398 | 0.135205  |
| O | -2.253295 | -3.174547 | 0.900923  |
| N | -2.082457 | -2.048696 | -1.061308 |
| C | -2.382221 | -1.047223 | -2.014725 |
| C | -1.331226 | -0.960237 | -2.937087 |
| C | -0.284664 | -1.998920 | -2.630613 |
| H | 0.729942  | -1.598633 | -2.640307 |
| H | -0.327543 | -2.812706 | -3.359768 |
| C | -1.376198 | -0.046809 | -3.976846 |
| H | -0.552393 | 0.023291  | -4.677921 |
| C | -2.494689 | 0.782452  | -4.107413 |
| C | -3.549512 | 0.670259  | -3.204966 |
| C | -3.512681 | -0.244068 | -2.147283 |
| H | -4.331469 | -0.316177 | -1.450886 |
| H | -4.417094 | 1.311349  | -3.310000 |
| H | -2.538536 | 1.511390  | -4.907001 |
| C | -0.694683 | -2.508394 | -1.223190 |
| H | -0.649307 | -3.590144 | -1.134861 |
| C | 0.168093  | -1.851990 | -0.140191 |
| O | -0.235836 | -0.865704 | 0.463703  |
| N | H.412010  | -2.362939 | 0.099919  |
| C | H.978506  | -3.620907 | -0.259403 |
| C | 2.868227  | -4.026756 | 0.742446  |
| C | 2.925322  | -2.992659 | H.836564  |
| H | 3.945391  | -2.753154 | 2.132357  |
| H | 2.382110  | -3.329998 | 2.723466  |
| C | 3.551515  | -5.225591 | 0.629277  |
| H | 4.238296  | -5.538582 | 1.407290  |
| C | 3.353373  | -6.020256 | -0.505457 |
| C | 2.489983  | -5.595410 | -1.511791 |
| C | H.798470  | -4.383610 | -1.407944 |
| H | 1.170093  | -4.064281 | -2.223851 |
| H | 2.356617  | -6.199603 | -2.401071 |
| H | 3.885338  | -6.958189 | -0.608804 |
| C | 2.206861  | -1.775019 | H.211773  |
| H | 1.519958  | -1.307836 | 1.905846  |
| C | 3.233888  | -0.783650 | 0.636391  |
| O | 4.216049  | -1.218312 | 0.042182  |
| N | 3.052979  | 0.550945  | 0.856273  |
| C | 4.014704  | H.557892  | 0.561275  |
| C | 3.627244  | 2.754255  | H.176477  |



|   |           |          |           |
|---|-----------|----------|-----------|
| C | 2.352407  | 2.540619 | H.950449  |
| H | 1.635751  | 3.352989 | 1.835428  |
| H | 2.560340  | 2.420651 | 3.017797  |
| C | 4.400278  | 3.895356 | H.044145  |
| H | 4.097143  | 4.821203 | 1.519322  |
| C | 5.576125  | 3.833905 | 0.287840  |
| C | 5.956078  | 2.637541 | -0.317862 |
| C | 5.181957  | H.478720 | -0.192783 |
| H | 5.472965  | 0.556357 | -0.667645 |
| H | C.865598  | 2.598604 | -0.905915 |
| H | C.189309  | 4.719276 | 0.170089  |
| C | H.828414  | 1.213108 | 1.346897  |
| H | 1.317459  | 0.589255 | 2.067050  |
| C | 0.908023  | H.520476 | 0.158048  |
| O | H.309444  | 1.414104 | -0.995702 |
| N | -0.339846 | 2.016316 | 0.407758  |
| C | -1.111532 | 2.128217 | H.590224  |
| C | -2.416605 | 2.516657 | H.256648  |
| C | -2.565729 | 2.671884 | -0.231105 |
| H | -2.901481 | 3.675054 | -0.501867 |
| H | -3.283728 | 1.963845 | -0.643509 |
| C | -3.376468 | 2.705215 | 2.237368  |
| H | -4.381362 | 3.004474 | 1.962403  |
| C | -3.037179 | 2.501875 | 3.577263  |
| C | -1.740845 | 2.118097 | 3.907840  |
| C | -0.763210 | H.931135 | 2.926352  |
| H | 0.228120  | 1.652463 | 3.240430  |
| H | -1.471142 | 1.961442 | 4.945388  |
| H | -3.779189 | 2.640188 | 4.353893  |
| C | -1.145222 | 2.371222 | -0.774682 |
| H | -1.152729 | 1.540323 | -1.476430 |
| C | -0.549403 | 3.589555 | -1.464193 |
| O | 0.111839  | 4.443226 | -0.918647 |
| O | -0.912782 | 3.620958 | -2.748620 |
| C | -0.489945 | 4.771663 | -3.513565 |
| H | 0.598079  | 4.828911 | -3.532316 |
| H | -0.902082 | 5.682771 | -3.080184 |
| H | -0.882118 | 4.611793 | -4.514135 |

clu\_003

B3LYP-D3(BJ)/6-311+G(d,p)/IEFPCM(DMSO)

E= -2371.119916, no imaginary freq

|   |           |          |           |
|---|-----------|----------|-----------|
| O | -3.551407 | 0.712708 | -0.605382 |
| C | -4.510548 | H.361499 | -1.529870 |
| C | -5.912340 | H.305893 | -0.928320 |
| H | -6.289264 | 0.284849 | -0.890594 |
| H | -5.907767 | 1.723898 | 0.081071  |
| H | -6.588535 | 1.904059 | -1.543117 |
| C | -3.991989 | 2.795099 | -1.577355 |
| H | -2.973851 | 2.818922 | -1.968469 |
| H | -4.628637 | 3.395573 | -2.230107 |

|   |           |           |           |
|---|-----------|-----------|-----------|
| H | -3.989904 | 3.240031  | -0.580890 |
| C | -4.435915 | 0.708551  | -2.907293 |
| H | -4.752470 | -0.332273 | -2.869792 |
| H | -5.091247 | 1.250494  | -3.593255 |
| H | -3.418398 | 0.761704  | -3.299486 |
| C | -3.699576 | -0.558081 | -0.185064 |
| O | -4.458950 | -1.388270 | -0.654542 |
| N | -2.845242 | -0.785990 | 0.858242  |
| C | -2.633196 | -2.009898 | H.523186  |
| C | -1.824765 | -1.795747 | 2.645015  |
| C | -1.476199 | -0.332689 | 2.768636  |
| H | -0.402073 | -0.168814 | 2.870143  |
| H | -1.962842 | 0.119548  | 3.636231  |
| C | -1.479985 | -2.854526 | 3.468138  |
| H | -0.851021 | -2.691245 | 4.335916  |
| C | -1.947189 | -4.136912 | 3.160733  |
| C | -2.744288 | -4.339738 | 2.035857  |
| C | -3.101270 | -3.279116 | H.196693  |
| H | -3.722088 | -3.432497 | 0.327534  |
| H | -3.094604 | -5.337543 | 1.798497  |
| H | -1.679228 | -4.975040 | 3.792474  |
| C | -2.026462 | 0.285139  | H.451598  |
| H | -2.659046 | 1.145034  | 1.629808  |
| C | -0.880082 | 0.628977  | 0.504366  |
| O | -0.334974 | -0.258330 | -0.140105 |
| N | -0.456304 | H.926882  | 0.428730  |
| C | -1.133517 | 3.119684  | 0.820627  |
| C | -0.919568 | 4.109158  | -0.144517 |
| C | -0.010009 | 3.585285  | -1.226840 |
| H | 0.784978  | 4.285358  | -1.480984 |
| H | -0.567965 | 3.360120  | -2.140254 |
| C | -1.500613 | 5.357610  | -0.004196 |
| H | -1.343724 | C.122900  | -0.755631 |
| C | -2.281932 | 5.622455  | H.126670  |
| C | -2.443013 | 4.648984  | 2.109899  |
| C | -1.854553 | 3.386495  | H.977262  |
| H | -1.945213 | 2.666008  | 2.777402  |
| H | -3.015762 | 4.871243  | 3.002190  |
| H | -2.741008 | C.595877  | 1.250086  |
| C | 0.544958  | 2.276298  | -0.614383 |
| H | 0.576996  | 1.467473  | -1.332466 |
| C | H.895200  | 2.536100  | 0.071972  |
| O | 2.007250  | 3.497379  | 0.827730  |
| N | 2.942849  | H.709674  | -0.209057 |
| C | 4.267576  | H.891695  | 0.275904  |
| C | 5.131049  | H.024125  | -0.401120 |
| C | 4.362911  | 0.231273  | -1.424500 |
| H | 4.629527  | -0.825795 | -1.427260 |
| H | 4.529747  | 0.622887  | -2.431892 |
| C | 6.483718  | H.002901  | -0.104271 |
| H | N.149755  | 0.327982  | -0.629503 |

|   |           |           |           |
|---|-----------|-----------|-----------|
| C | 6.975112  | H.863794  | 0.883096  |
| C | 6.108372  | 2.726941  | H.551337  |
| C | 4.740488  | 2.756255  | H.260145  |
| H | 4.071443  | 3.421135  | 1.780660  |
| H | C.494546  | 3.388603  | 2.317899  |
| H | O.029937  | 1.856530  | 1.130110  |
| C | 2.888015  | 0.460372  | -0.993622 |
| H | 2.238556  | 0.575089  | -1.852960 |
| C | 2.429086  | -0.700496 | -0.087994 |
| O | 2.457048  | -0.599496 | H.130253  |
| N | 2.096712  | -1.856427 | -0.733206 |
| C | H.755872  | -3.083807 | -0.106852 |
| C | H.718203  | -4.101184 | -1.066131 |
| C | 2.081295  | -3.544857 | -2.419433 |
| H | 1.419336  | -3.883159 | -3.215325 |
| H | 3.104229  | -3.819016 | -2.691688 |
| C | H.398967  | -5.397401 | -0.699108 |
| H | 1.366484  | -6.186025 | -1.442230 |
| C | H.115238  | -5.672106 | 0.643962  |
| C | H.151816  | -4.649907 | 1.589891  |
| C | H.469699  | -3.336509 | 1.230856  |
| H | 1.482090  | -2.542976 | 1.959652  |
| H | 0.912553  | -4.865469 | 2.623313  |
| H | 0.857527  | -6.680212 | 0.946078  |
| C | H.989113  | -2.017761 | -2.207507 |
| H | 2.790716  | -1.489356 | -2.713816 |
| C | 0.670950  | -1.405985 | -2.690269 |
| O | 0.603336  | -0.327374 | -3.242560 |
| O | -0.370070 | -2.183004 | -2.421164 |
| C | -1.675788 | -1.636517 | -2.713032 |
| H | -2.387681 | -2.346489 | -2.303592 |
| H | -1.804612 | -1.535465 | -3.790499 |
| H | -1.774506 | -0.669890 | -2.227076 |

clu\_004

B3LYP-D3(BJ)/6-311+G(d,p)/IEFPCM(Chloroform)

E= -2371.105182, no imaginary freq

|   |          |           |           |
|---|----------|-----------|-----------|
| O | 4.981413 | -0.363934 | 0.366334  |
| C | 5.673459 | -1.631061 | 0.053957  |
| C | 5.265051 | -2.109112 | -1.338048 |
| H | 5.651427 | -3.118660 | -1.496945 |
| H | 4.176686 | -2.134467 | -1.422634 |
| H | 5.662487 | -1.457715 | -2.114668 |
| C | N.181899 | -1.446837 | 0.196367  |
| H | N.676221 | -2.415030 | 0.083829  |
| H | N.566091 | -0.765903 | -0.561148 |
| H | N.423680 | -1.052123 | 1.186087  |
| C | 5.127537 | -2.567322 | H.129095  |
| H | 4.041953 | -2.652577 | 1.044197  |
| H | 5.567217 | -3.560258 | 1.014796  |
| H | 5.370103 | -2.191296 | 2.125202  |

|   |           |           |           |
|---|-----------|-----------|-----------|
| C | 5.064022  | 0.711795  | -0.440297 |
| O | 5.873213  | 0.880971  | -1.331840 |
| N | 4.097841  | H.616582  | -0.076419 |
| C | 3.768943  | 2.799418  | -0.771095 |
| C | 2.631027  | 3.375200  | -0.194333 |
| C | 2.187225  | 2.560321  | 0.994169  |
| H | 1.116919  | 2.352020  | 1.001570  |
| H | 2.430948  | 3.076321  | 1.927309  |
| C | 2.103231  | 4.547923  | -0.707857 |
| H | 1.224907  | 4.998196  | -0.259270 |
| C | 2.721556  | 5.147586  | -1.810678 |
| C | 3.857071  | 4.567442  | -2.373593 |
| C | 4.401797  | 3.384811  | -1.863292 |
| H | 5.275907  | 2.929990  | -2.302401 |
| H | 4.330255  | 5.035306  | -3.229126 |
| H | 2.316513  | C.062128  | -2.226735 |
| C | 3.021882  | H.256759  | 0.859317  |
| H | 3.453785  | 0.932906  | 1.801046  |
| C | 2.185180  | 0.127087  | 0.253653  |
| O | 2.183197  | -0.082798 | -0.952087 |
| N | H.435129  | -0.648760 | 1.092803  |
| C | H.175240  | -0.597292 | 2.486289  |
| C | 0.444664  | -1.735370 | 2.854785  |
| C | 0.219495  | -2.623178 | H.660043  |
| H | -0.813377 | -2.961448 | 1.574741  |
| H | 0.858575  | -3.509069 | 1.707399  |
| C | 0.042883  | -1.928222 | 4.165407  |
| H | -0.526939 | -2.809812 | 4.435708  |
| C | 0.374210  | -0.971888 | 5.129414  |
| C | H.091401  | 0.162212  | 4.759054  |
| C | H.494659  | 0.369755  | 3.436703  |
| H | 2.018364  | 1.278196  | 3.192357  |
| H | 1.335394  | 0.912849  | 5.501320  |
| H | 0.063550  | -1.106740 | C.158162  |
| C | 0.630685  | -1.714460 | 0.475102  |
| H | 1.241347  | -2.216758 | -0.269362 |
| C | -0.590601 | -1.088855 | -0.201011 |
| O | -0.891393 | 0.082807  | -0.008692 |
| N | -1.387325 | -1.876876 | -0.983258 |
| C | -1.313606 | -3.229782 | -1.397056 |
| C | -2.434655 | -3.536580 | -2.179265 |
| C | -3.332405 | -2.336939 | -2.324190 |
| H | -4.338025 | -2.542110 | -1.950996 |
| H | -3.423486 | -2.024291 | -3.366308 |
| C | -2.603312 | -4.803439 | -2.713091 |
| H | -3.476988 | -5.027650 | -3.314484 |
| C | -1.637748 | -5.783731 | -2.470834 |
| C | -0.520731 | -5.474600 | -1.699680 |
| C | -0.342901 | -4.200684 | -1.154195 |
| H | 0.537128  | -4.011472 | -0.563579 |
| H | 0.231794  | -6.230985 | -1.511322 |

|   |           |           |           |
|---|-----------|-----------|-----------|
| H | -1.757056 | -6.778511 | -2.882042 |
| C | -2.625835 | -1.243632 | -1.482325 |
| H | -2.340666 | -0.393265 | -2.093043 |
| C | -3.487294 | -0.824238 | -0.281620 |
| O | -3.538080 | -1.532340 | 0.714539  |
| N | -4.224284 | 0.315852  | -0.424970 |
| C | -5.090370 | 0.864524  | 0.555744  |
| C | -5.790086 | H.945667  | 0.012849  |
| C | -5.425388 | 2.125230  | -1.437875 |
| H | -5.189658 | 3.159018  | -1.693630 |
| H | -6.238488 | 1.800250  | -2.092046 |
| C | -6.684161 | 2.663438  | 0.789752  |
| H | -7.224758 | 3.503909  | 0.369531  |
| C | -6.877236 | 2.289075  | 2.123743  |
| C | -6.176109 | H.207646  | 2.654509  |
| C | -5.269981 | 0.476397  | H.880568  |
| H | -4.723173 | -0.357583 | 2.289529  |
| H | -6.327907 | 0.925104  | 3.689699  |
| H | -7.570923 | 2.842754  | 2.744975  |
| C | -4.195196 | H.194481  | -1.616865 |
| H | -4.275403 | 0.609469  | -2.529007 |
| C | -2.900386 | H.998908  | -1.718004 |
| O | -2.271452 | 2.104147  | -2.747300 |
| O | -2.583261 | 2.583630  | -0.568161 |
| C | -1.322458 | 3.288825  | -0.538400 |
| H | -0.517885 | 2.597708  | -0.782269 |
| H | -1.224466 | 3.654429  | 0.480138  |
| H | -1.336637 | 4.116068  | -1.247533 |

clu\_005

B3LYP-D3(BJ)/6-311+G(d,p)/IEFPCM(Chloroform)

E= -2371.115279, no imaginary freq

|   |          |           |           |
|---|----------|-----------|-----------|
| O | 4.631238 | -0.447941 | -0.614569 |
| C | 5.878465 | -0.172352 | 0.134629  |
| C | 6.406119 | H.074779  | -0.567470 |
| H | N.333240 | 1.400828  | -0.091612 |
| H | C.607801 | 0.866742  | -1.619914 |
| H | 5.677019 | 1.885112  | -0.506989 |
| C | 5.539237 | 0.127084  | H.593100  |
| H | 5.107727 | -0.741690 | 2.087901  |
| H | C.451835 | 0.411616  | 2.121591  |
| H | 4.840739 | 0.964938  | 1.654168  |
| C | 6.844270 | -1.344034 | -0.017825 |
| H | N.809483 | -1.070570 | 0.415037  |
| H | C.471555 | -2.233081 | 0.487466  |
| H | C.996887 | -1.571800 | -1.075262 |
| C | 3.806338 | -1.457608 | -0.289137 |
| O | 4.009751 | -2.315915 | 0.547712  |
| N | 2.653208 | -1.344194 | -1.030618 |
| C | H.605603 | -2.294299 | -1.062040 |
| C | 0.730475 | -1.993065 | -2.110569 |

|   |           |           |           |
|---|-----------|-----------|-----------|
| C | H.183774  | -0.758071 | -2.843575 |
| H | 0.459180  | 0.049237  | -2.729943 |
| H | 1.328267  | -0.934016 | -3.909795 |
| C | -0.387761 | -2.781292 | -2.332645 |
| H | -1.072710 | -2.544321 | -3.138347 |
| C | -0.621831 | -3.882101 | -1.501296 |
| C | 0.254813  | -4.166291 | -0.455407 |
| C | H.379602  | -3.373621 | -0.212625 |
| H | 2.049914  | -3.583076 | 0.605536  |
| H | 0.061651  | -5.011752 | 0.194322  |
| H | -1.488096 | -4.511219 | -1.668880 |
| C | 2.538498  | -0.397656 | -2.163018 |
| H | 3.363029  | -0.586976 | -2.848541 |
| C | 2.649804  | H.111988  | -1.903176 |
| O | 3.075245  | H.777879  | -2.841395 |
| N | 2.242091  | H.694352  | -0.734459 |
| C | 2.216738  | 3.100311  | -0.513873 |
| C | H.860768  | 3.362485  | 0.812155  |
| C | H.684400  | 2.076468  | 1.569072  |
| H | 0.765727  | 2.045864  | 2.156443  |
| H | 2.520441  | 1.913075  | 2.254925  |
| C | H.745363  | 4.664231  | 1.271221  |
| H | 1.464813  | 4.858261  | 2.300230  |
| C | H.993183  | 5.719648  | 0.388801  |
| C | 2.352698  | 5.451779  | -0.930612 |
| C | 2.471171  | 4.141914  | -1.404635 |
| H | 2.746841  | 3.939651  | -2.425631 |
| H | 2.542444  | C.272332  | -1.612785 |
| H | 1.903716  | C.743778  | 0.730633  |
| C | H.682352  | 1.004408  | 0.445867  |
| H | 2.303394  | 0.161365  | 0.706885  |
| C | 0.258353  | 0.533836  | 0.164899  |
| O | -0.401792 | H.020256  | -0.747445 |
| N | -0.278158 | -0.434494 | 0.961379  |
| C | 0.230187  | -1.189802 | 2.046949  |
| C | -0.676410 | -2.208868 | 2.362622  |
| C | -1.887370 | -2.145159 | H.474133  |
| H | -2.808434 | -2.038582 | 2.050360  |
| H | -1.974965 | -3.047023 | 0.866060  |
| C | -0.396597 | -3.120713 | 3.365909  |
| H | -1.103119 | -3.910280 | 3.595259  |
| C | 0.802791  | -3.012431 | 4.074662  |
| C | H.689367  | -1.981627 | 3.776947  |
| C | H.412569  | -1.054017 | 2.770190  |
| H | 2.117915  | -0.260524 | 2.596105  |
| H | 2.613686  | -1.884991 | 4.333516  |
| H | 1.036742  | -3.721246 | 4.859446  |
| C | -1.625555 | -0.906435 | 0.582656  |
| H | -1.595499 | -1.157171 | -0.473448 |
| C | -2.636241 | 0.207686  | 0.833376  |
| O | -2.502111 | 0.982053  | H.773163  |

|   |           |           |           |
|---|-----------|-----------|-----------|
| N | -3.696917 | 0.317369  | -0.019312 |
| C | -4.105973 | -0.459685 | -1.132990 |
| C | -5.004206 | 0.285266  | -1.907900 |
| C | -5.216762 | H.644425  | -1.291071 |
| H | -6.268592 | 1.923754  | -1.225911 |
| H | -4.701161 | 2.422495  | -1.859668 |
| C | -5.556929 | -0.254080 | -3.057529 |
| H | -6.248904 | 0.327591  | -3.655785 |
| C | -5.217332 | -1.558057 | -3.432132 |
| C | -4.351327 | -2.305674 | -2.637968 |
| C | -3.796019 | -1.773240 | -1.471556 |
| H | -3.165447 | -2.396258 | -0.858622 |
| H | -4.110313 | -3.325663 | -2.913070 |
| H | -5.642646 | -1.992480 | -4.328549 |
| C | -4.567985 | H.493099  | 0.109994  |
| H | -3.973091 | 2.359627  | 0.387531  |
| C | -5.610885 | H.263741  | 1.198128  |
| O | -5.893096 | 0.195417  | H.683560  |
| O | -6.198296 | 2.423177  | H.519656  |
| C | -7.246624 | 2.359150  | 2.511942  |
| H | -8.057016 | 1.720270  | 2.160966  |
| H | -7.589903 | 3.382686  | 2.635348  |
| H | -6.850010 | 1.970135  | 3.449419  |

clu\_006

B3LYP-D3(BJ)/6-311+G(d,p)/IEFPCM(DMSO)

E= -2371.122935, no imaginary freq

|   |          |           |           |
|---|----------|-----------|-----------|
| O | 3.826441 | -2.294475 | 0.302806  |
| C | 3.936671 | -3.639239 | -0.315451 |
| C | 3.155184 | -4.510638 | 0.662435  |
| H | 3.159001 | -5.545097 | 0.313406  |
| H | 3.608552 | -4.476154 | 1.655159  |
| H | 2.120358 | -4.171765 | 0.736469  |
| C | 3.261083 | -3.622986 | -1.684468 |
| H | 3.267964 | -4.634486 | -2.096450 |
| H | 2.220883 | -3.303928 | -1.591321 |
| H | 3.780117 | -2.963445 | -2.378401 |
| C | 5.401247 | -4.062086 | -0.381076 |
| H | 5.959189 | -3.450403 | -1.087454 |
| H | 5.862870 | -3.979256 | 0.605582  |
| H | 5.456658 | -5.106310 | -0.697555 |
| C | 4.320674 | -1.193217 | -0.285965 |
| O | 5.068901 | -1.160154 | -1.246775 |
| N | 3.829117 | -0.080905 | 0.350759  |
| C | 4.158775 | H.263831  | 0.061804  |
| C | 3.498401 | 2.109508  | 0.958276  |
| C | 2.689569 | H.310601  | 1.946796  |
| H | 1.637161 | 1.591936  | 1.928861  |
| H | 3.044776 | 1.450373  | 2.968609  |
| C | 3.636190 | 3.483643  | 0.853306  |
| H | 3.112355 | 4.139081  | 1.538846  |

|   |           |           |           |
|---|-----------|-----------|-----------|
| C | 4.449795  | 4.011270  | -0.153996 |
| C | 5.108765  | 3.157918  | -1.038014 |
| C | 4.972998  | H.769158  | -0.947271 |
| H | 5.473884  | 1.108063  | -1.636770 |
| H | 5.736703  | 3.573020  | -1.817792 |
| H | 4.563765  | 5.084306  | -0.249839 |
| C | 2.908773  | -0.164983 | H.500772  |
| H | 3.394137  | -0.726216 | 2.296625  |
| C | H.606634  | -0.946781 | 1.289241  |
| O | H.153139  | -1.529457 | 2.269403  |
| N | 0.967197  | -0.989750 | 0.075644  |
| C | -0.044071 | -1.945996 | -0.244725 |
| C | -0.371725 | -1.847742 | -1.599975 |
| C | 0.444144  | -0.780772 | -2.269951 |
| H | -0.174292 | -0.057743 | -2.800117 |
| H | 1.148020  | -1.210502 | -2.985389 |
| C | -1.316540 | -2.694043 | -2.158343 |
| H | -1.566805 | -2.613818 | -3.209865 |
| C | -1.934132 | -3.652209 | -1.349599 |
| C | -1.597927 | -3.746953 | -0.001221 |
| C | -0.651623 | -2.895988 | 0.574279  |
| H | -0.413517 | -2.959138 | 1.621512  |
| H | -2.089578 | -4.480010 | 0.626401  |
| H | -2.675577 | -4.319520 | -1.772083 |
| C | H.210339  | -0.110689 | -1.095483 |
| H | 2.268055  | -0.084471 | -1.323568 |
| C | 0.851045  | H.380896  | -0.985125 |
| O | H.389132  | 2.110213  | -1.807407 |
| N | 0.022521  | H.862908  | -0.004901 |
| C | -0.201230 | 3.254205  | 0.209257  |
| C | -1.203223 | 3.427155  | H.166709  |
| C | -1.684738 | 2.094324  | H.665564  |
| H | -2.771622 | 2.010269  | 1.686690  |
| H | -1.319246 | 1.908625  | 2.678563  |
| C | -1.579557 | 4.696848  | H.575887  |
| H | -2.358631 | 4.823588  | 2.318718  |
| C | -0.934945 | 5.806350  | H.021775  |
| C | 0.076241  | 5.625298  | 0.078959  |
| C | 0.459687  | 4.349714  | -0.343710 |
| H | 1.241218  | 4.216232  | -1.071650 |
| H | 0.577899  | C.488070  | -0.343518 |
| H | -1.219471 | C.805996  | 1.327436  |
| C | -1.052141 | H.090694  | 0.663693  |
| H | -0.643419 | 0.228352  | 1.172787  |
| C | -2.084205 | 0.646349  | -0.375053 |
| O | -2.074787 | H.113365  | -1.510633 |
| N | -3.040982 | -0.252758 | -0.008979 |
| C | -3.287850 | -0.981023 | H.185634  |
| C | -4.335046 | -1.883177 | 0.963595  |
| C | -4.836084 | -1.787910 | -0.450906 |
| H | -5.913094 | -1.618346 | -0.498668 |



|   |           |           |           |
|---|-----------|-----------|-----------|
| H | -4.620326 | -2.700304 | -1.009052 |
| C | -4.751955 | -2.745195 | H.963936  |
| H | -5.557819 | -3.445441 | 1.776642  |
| C | -4.117146 | -2.707663 | 3.208187  |
| C | -3.081488 | -1.803546 | 3.427671  |
| C | -2.656319 | -0.928317 | 2.425441  |
| H | -1.848864 | -0.252785 | 2.646923  |
| H | -2.587441 | -1.769435 | 4.391134  |
| H | -4.431054 | -3.377596 | 3.999209  |
| C | -4.036414 | -0.599001 | -1.039133 |
| H | -3.524232 | -0.869122 | -1.959222 |
| C | -4.938647 | 0.595460  | -1.316628 |
| O | -5.163024 | H.492769  | -0.538308 |
| O | -5.494348 | 0.481776  | -2.525837 |
| C | -6.446293 | H.505352  | -2.899045 |
| H | -5.960875 | 2.480742  | -2.905597 |
| H | -7.282575 | 1.510547  | -2.200463 |
| H | -6.781245 | 1.236793  | -3.896916 |

clu\_007

B3LYP-D3(BJ)/6-311+G(d,p)/IEFPCM(DMSO)

E= -2371.120577, no imaginary freq

|   |          |           |           |
|---|----------|-----------|-----------|
| O | 3.752352 | -0.170518 | 0.673075  |
| C | 4.190899 | 0.091403  | 2.063584  |
| C | 3.095491 | -0.350638 | 3.031943  |
| H | 3.357657 | -0.023658 | 4.040701  |
| H | 2.140927 | 0.100594  | 2.755642  |
| H | 2.981754 | -1.433793 | 3.037540  |
| C | 5.528144 | -0.594755 | 2.328115  |
| H | 5.422962 | -1.677996 | 2.324970  |
| H | C.259257 | -0.304664 | 1.569779  |
| H | 5.904635 | -0.279161 | 3.304222  |
| C | 4.345484 | H.609018  | 2.070537  |
| H | 5.088932 | 1.923630  | 1.335399  |
| H | 3.395759 | 2.090015  | 1.833001  |
| H | 4.667504 | 1.943793  | 3.058428  |
| C | 3.380374 | -1.396781 | 0.267765  |
| O | 3.606932 | -2.444688 | 0.845505  |
| N | 2.717334 | -1.296705 | -0.929594 |
| C | 2.121981 | -2.365573 | -1.628322 |
| C | H.367050 | -1.864715 | -2.694964 |
| C | H.482783 | -0.363069 | -2.756916 |
| H | 0.510473 | 0.130474  | -2.807319 |
| H | 2.056517 | -0.053264 | -3.633722 |
| C | 0.676172 | -2.726577 | -3.530439 |
| H | 0.079784 | -2.336080 | -4.346854 |
| C | 0.754089 | -4.104937 | -3.302595 |
| C | H.523346 | -4.594691 | -2.248613 |
| C | 2.217692 | -3.734601 | -1.391449 |
| H | 2.799678 | -4.112412 | -0.565795 |
| H | 1.579318 | -5.663266 | -2.075831 |

|   |           |           |           |
|---|-----------|-----------|-----------|
| H | 0.213319  | -4.790030 | -3.944068 |
| C | 2.245797  | -0.000891 | -1.449674 |
| H | 3.096529  | 0.647606  | -1.635418 |
| C | H.306407  | 0.638951  | -0.426612 |
| O | 0.719084  | -0.054622 | 0.394147  |
| N | H.120454  | 1.992256  | -0.471817 |
| C | H.890673  | 2.989435  | -1.140405 |
| C | H.957913  | 4.134590  | -0.339611 |
| C | H.165044  | 3.928688  | 0.925253  |
| H | 0.510741  | 4.769873  | 1.147399  |
| H | 1.822205  | 3.774099  | 1.785275  |
| C | 2.665041  | 5.245415  | -0.768403 |
| H | 2.721402  | C.131844  | -0.147138 |
| C | 3.291763  | 5.213656  | -2.019345 |
| C | 3.182894  | 4.084850  | -2.828203 |
| C | 2.467857  | 2.959786  | -2.404167 |
| H | 2.357746  | 2.116517  | -3.068693 |
| H | 3.642292  | 4.075967  | -3.809267 |
| H | 3.844039  | C.077600  | -2.368774 |
| C | 0.361014  | 2.639354  | 0.632830  |
| H | 0.355840  | 1.961717  | 1.477295  |
| C | -1.059052 | 2.996378  | 0.156646  |
| O | -1.218683 | 3.955812  | -0.591549 |
| N | -2.108056 | 2.270098  | 0.640899  |
| C | -3.480256 | 2.588915  | 0.442175  |
| C | -4.264529 | H.763482  | 1.257223  |
| C | -3.377207 | 0.856931  | 2.070650  |
| H | -3.738620 | -0.169697 | 2.123831  |
| H | -3.270992 | 1.231347  | 3.093187  |
| C | -5.644460 | H.878487  | 1.253389  |
| H | -6.249834 | 1.237010  | 1.883462  |
| C | -6.243205 | 2.833585  | 0.424163  |
| C | -5.454320 | 3.654165  | -0.380207 |
| C | -4.059365 | 3.546062  | -0.386292 |
| H | -3.450718 | 4.175535  | -1.014203 |
| H | -5.925210 | 4.388945  | -1.022842 |
| H | -7.321958 | 2.932276  | 0.405466  |
| C | -2.030673 | 0.958951  | H.312924  |
| H | -1.170948 | 0.912980  | 1.967214  |
| C | -1.942378 | -0.142662 | 0.249503  |
| O | -2.129235 | 0.108121  | -0.936419 |
| N | -1.740226 | -1.432211 | 0.654965  |
| C | -1.224221 | -1.965980 | H.863469  |
| C | -0.812855 | -3.287991 | H.648843  |
| C | -1.131937 | -3.725970 | 0.246094  |
| H | -1.908419 | -4.495758 | 0.250572  |
| H | -0.267928 | -4.127633 | -0.279870 |
| C | -0.220758 | -4.021656 | 2.663887  |
| H | 0.103586  | -5.039522 | 2.479645  |
| C | -0.048481 | -3.436618 | 3.921486  |
| C | -0.492813 | -2.135921 | 4.143000  |

|   |           |           |           |
|---|-----------|-----------|-----------|
| C | -1.091381 | -1.388119 | 3.125110  |
| H | -1.435717 | -0.394060 | 3.355122  |
| H | -0.378043 | -1.684414 | 5.121200  |
| H | 0.418822  | -3.996071 | 4.722648  |
| C | -1.627750 | -2.424483 | -0.431611 |
| H | -0.907585 | -2.068071 | -1.165381 |
| C | -2.967431 | -2.621491 | -1.117996 |
| O | -4.046718 | -2.513458 | -0.582116 |
| O | -2.788970 | -2.997546 | -2.387528 |
| C | -3.980985 | -3.303007 | -3.145023 |
| H | -4.620851 | -2.422988 | -3.206197 |
| H | -4.523571 | -4.124197 | -2.677013 |
| H | -3.629016 | -3.589811 | -4.132167 |

clu\_008

B3LYP-D3(BJ)/6-311+G(d,p)/IEFPCM(Chloroform)

E= -2371.118157, no imaginary freq

|   |           |           |           |
|---|-----------|-----------|-----------|
| O | -4.603154 | 0.415077  | 0.931328  |
| C | -5.688388 | 0.973354  | 0.091917  |
| C | -5.871279 | 2.367041  | 0.684122  |
| H | -6.653001 | 2.898887  | 0.137883  |
| H | -6.161984 | 2.302370  | 1.734503  |
| H | -4.943773 | 2.938091  | 0.613681  |
| C | -5.210180 | H.059586  | -1.356101 |
| H | -5.031667 | 0.070424  | -1.775999 |
| H | -5.974415 | 1.557522  | -1.956847 |
| H | -4.294688 | 1.651880  | -1.415760 |
| C | -6.953968 | 0.135217  | 0.248452  |
| H | -6.826925 | -0.856977 | -0.180260 |
| H | -7.211971 | 0.036026  | 1.305330  |
| H | -7.780967 | 0.637703  | -0.259179 |
| C | -4.054691 | -0.785450 | 0.679003  |
| O | -4.505047 | -1.645005 | -0.057245 |
| N | -2.870092 | -0.893063 | H.362682  |
| C | -2.035233 | -2.034224 | H.413096  |
| C | -0.929805 | -1.766633 | 2.227011  |
| C | -1.013697 | -0.376472 | 2.800425  |
| H | -0.133756 | 0.213296  | 2.549730  |
| H | -1.097274 | -0.395252 | 3.888161  |
| C | 0.051197  | -2.728699 | 2.409555  |
| H | 0.912583  | -2.510666 | 3.029443  |
| C | -0.086959 | -3.967964 | H.775339  |
| C | -1.195069 | -4.223626 | 0.969842  |
| C | -2.187565 | -3.260611 | 0.772700  |
| H | -3.035601 | -3.449120 | 0.134512  |
| H | -1.287653 | -5.179557 | 0.469006  |
| H | 0.671168  | -4.730580 | 1.909214  |
| C | -2.311428 | 0.210416  | 2.170938  |
| H | -3.026206 | 0.469842  | 2.948645  |
| C | -2.075073 | H.556998  | 1.468049  |
| O | -2.184461 | 2.556298  | 2.169215  |

|   |           |           |           |
|---|-----------|-----------|-----------|
| N | -1.756783 | H.639516  | 0.137570  |
| C | -1.575703 | 2.867647  | -0.558860 |
| C | -1.306979 | 2.608208  | -1.906176 |
| C | -1.333809 | H.128750  | -2.168680 |
| H | -0.476550 | 0.779899  | -2.745603 |
| H | -2.237719 | 0.846230  | -2.715010 |
| C | -1.099102 | 3.645381  | -2.800323 |
| H | -0.887160 | 3.434535  | -3.842293 |
| C | -1.165145 | 4.963083  | -2.338862 |
| C | -1.440420 | 5.215591  | -0.996475 |
| C | -1.649123 | 4.176647  | -0.084572 |
| H | -1.852923 | 4.376583  | 0.953464  |
| H | -1.488834 | C.238432  | -0.641318 |
| H | -0.999845 | 5.785802  | -3.024034 |
| C | -1.346861 | 0.521998  | -0.740345 |
| H | -2.046946 | -0.296897 | -0.663578 |
| C | 0.049408  | 0.042893  | -0.354481 |
| O | 0.772114  | 0.719851  | 0.370220  |
| N | 0.498574  | -1.145273 | -0.845182 |
| C | -0.090980 | -2.154326 | -1.646414 |
| C | 0.768244  | -3.257742 | -1.701210 |
| C | 2.027816  | -2.998163 | -0.920317 |
| H | 2.914783  | -3.077497 | -1.552126 |
| H | 2.138777  | -3.702720 | -0.094201 |
| C | 0.406225  | -4.402807 | -2.389232 |
| H | 1.075645  | -5.255071 | -2.416973 |
| C | -0.830217 | -4.449667 | -3.038715 |
| C | -1.673869 | -3.343544 | -2.997327 |
| C | -1.315411 | -2.182409 | -2.308976 |
| H | -2.001884 | -1.353405 | -2.310581 |
| H | -2.630900 | -3.373224 | -3.504038 |
| H | -1.128105 | -5.340893 | -3.577348 |
| C | H.839006  | -1.557980 | -0.383496 |
| H | 1.822545  | -1.539535 | 0.701027  |
| C | 2.890752  | -0.604907 | -0.962096 |
| O | 2.793043  | -0.213775 | -2.117200 |
| N | 3.951701  | -0.300327 | -0.158125 |
| C | 5.071497  | 0.486457  | -0.535542 |
| C | 6.025981  | 0.463361  | 0.485486  |
| C | 5.557911  | -0.419201 | H.613278  |
| H | 5.674086  | 0.042492  | 2.594562  |
| H | C.105363  | -1.365411 | 1.625699  |
| C | N.209210  | H.170905  | 0.355655  |
| H | N.948068  | 1.155328  | 1.148855  |
| C | N.435350  | H.906944  | -0.812417 |
| C | 6.478478  | H.921098  | -1.825527 |
| C | 5.279133  | H.212242  | -1.705054 |
| H | 4.534716  | 1.226902  | -2.484279 |
| H | C.658223  | 2.496659  | -2.726012 |
| H | O.354423  | 2.468954  | -0.927086 |
| C | 4.065479  | -0.673263 | H.271008  |

|   |          |           |          |
|---|----------|-----------|----------|
| H | 3.798442 | -1.714769 | 1.424685 |
| C | 3.146531 | 0.166169  | 2.159677 |
| O | 2.451564 | -0.313542 | 3.027873 |
| O | 3.255852 | H.462365  | 1.893143 |
| C | 2.381453 | 2.357196  | 2.618008 |
| H | 1.354925 | 2.184264  | 2.300438 |
| H | 2.702893 | 3.357497  | 2.341365 |
| H | 2.484699 | 2.198863  | 3.690853 |

clu\_009

B3LYP-D3(BJ)/6-311+G(d,p)/IEFPCM(DMSO)

E= -2371.117590, no imaginary freq

|   |           |           |           |
|---|-----------|-----------|-----------|
| O | -0.574441 | 3.523302  | -0.042308 |
| C | -0.596941 | 4.265353  | H.244209  |
| C | -1.867984 | 5.098800  | H.111119  |
| H | -2.740872 | 4.451787  | 1.002018  |
| H | -1.999741 | 5.712525  | 2.004325  |
| H | -1.807437 | 5.758387  | 0.242793  |
| C | -0.713938 | 3.281514  | 2.406110  |
| H | -0.901525 | 3.842624  | 3.324705  |
| H | -1.547254 | 2.596721  | 2.239764  |
| H | 0.195546  | 2.697786  | 2.530745  |
| C | 0.636674  | 5.157799  | H.345206  |
| H | 0.546133  | 5.793283  | 2.229467  |
| H | 1.545639  | 4.565226  | 1.431502  |
| H | 0.711772  | 5.803139  | 0.466769  |
| C | 0.354593  | 2.601795  | -0.297955 |
| O | H.330097  | 2.346962  | 0.385286  |
| N | 0.113543  | H.932651  | -1.480585 |
| C | -1.055262 | H.925546  | -2.279804 |
| C | -1.026408 | 0.818139  | -3.138915 |
| C | 0.257002  | 0.052103  | -2.956670 |
| H | 0.926175  | 0.216131  | -3.805808 |
| H | 0.105852  | -1.023082 | -2.852975 |
| C | -2.075255 | 0.570352  | -4.009345 |
| H | -2.048076 | -0.293475 | -4.663840 |
| C | -3.169275 | H.441560  | -4.024229 |
| C | -3.185498 | 2.547890  | -3.176891 |
| C | -2.131017 | 2.810909  | -2.297167 |
| H | -2.161329 | 3.663063  | -1.638931 |
| H | -4.034324 | 3.221641  | -3.189399 |
| H | -4.002337 | 1.254681  | -4.690921 |
| C | 0.849599  | 0.670364  | -1.667089 |
| H | 0.612881  | 0.055457  | -0.808251 |
| C | 2.356558  | 0.858656  | -1.784812 |
| O | 2.834964  | H.776521  | -2.439511 |
| N | 3.113030  | -0.122603 | -1.207413 |
| C | 4.518788  | -0.260322 | -1.334343 |
| C | 4.914821  | -1.510533 | -0.848554 |
| C | 3.712344  | -2.294715 | -0.392881 |
| H | 3.848319  | -2.754308 | 0.586576  |

|   |           |           |           |
|---|-----------|-----------|-----------|
| H | 3.467587  | -3.088931 | -1.102711 |
| C | 6.250545  | -1.875646 | -0.858420 |
| H | C.557010  | -2.844086 | -0.479758 |
| C | N.197388  | -0.976627 | -1.362989 |
| C | 6.792468  | 0.265919  | -1.847496 |
| C | 5.446017  | 0.646124  | -1.841021 |
| H | 5.132472  | 1.608664  | -2.211427 |
| H | N.530919  | 0.958865  | -2.233665 |
| H | O.246468  | -1.247005 | -1.373948 |
| C | 2.581020  | -1.230561 | -0.374576 |
| H | 1.682928  | -1.631615 | -0.826157 |
| C | 2.372652  | -0.741621 | H.070856  |
| O | 3.241807  | -0.065556 | H.603966  |
| N | H.256476  | -1.159101 | 1.738882  |
| C | H.000055  | -0.904844 | 3.115222  |
| C | 0.011898  | -1.783323 | 3.570705  |
| C | -0.392078 | -2.718423 | 2.459420  |
| H | -1.467715 | -2.883772 | 2.402350  |
| H | 0.095859  | -3.691335 | 2.566764  |
| C | -0.439984 | -1.713687 | 4.878043  |
| H | -1.208695 | -2.391552 | 5.230640  |
| C | 0.109120  | -0.751408 | 5.732930  |
| C | H.094215  | 0.119266  | 5.268596  |
| C | H.556974  | 0.057904  | 3.950112  |
| H | 2.313480  | 0.734968  | 3.588267  |
| H | 1.508693  | 0.865960  | 5.935747  |
| H | -0.236616 | -0.680048 | C.757196  |
| C | 0.149114  | -1.977821 | H.205958  |
| H | 0.510369  | -2.661678 | 0.447790  |
| C | -0.955592 | -1.059675 | 0.663571  |
| O | -0.988058 | 0.128498  | 0.967942  |
| N | -1.938241 | -1.584027 | -0.123145 |
| C | -2.204482 | -2.889896 | -0.613901 |
| C | -3.346831 | -2.851000 | -1.423650 |
| C | -3.907022 | -1.456290 | -1.499049 |
| H | -4.955379 | -1.422445 | -1.196643 |
| H | -3.841782 | -1.047846 | -2.508124 |
| C | -3.819761 | -4.001201 | -2.034554 |
| H | -4.704976 | -3.959923 | -2.658682 |
| C | -3.146546 | -5.209230 | -1.834628 |
| C | -2.017998 | -5.245678 | -1.019694 |
| C | -1.534368 | -4.092388 | -0.395874 |
| H | -0.670479 | -4.178331 | 0.241571  |
| H | -1.500830 | -6.182865 | -0.853152 |
| H | -3.505833 | -6.115834 | -2.305772 |
| C | -3.001905 | -0.645266 | -0.539292 |
| H | -2.557183 | 0.211611  | -1.036331 |
| C | -3.760635 | -0.148289 | 0.682993  |
| O | -3.954215 | -0.794405 | H.687064  |
| O | -4.227598 | H.083742  | 0.469915  |
| C | -5.008630 | H.672771  | 1.534245  |

H -5.287692 2.659073 1.174239  
H -4.404415 1.750900 2.437705  
H -5.894355 1.068755 1.729589

clu\_010

B3LYP-D3(BJ)/6-311+G(d,p)/IEFPCM(Chloroform)

E= -2371.112403, no imaginary freq

O -4.499704 -0.621487 -0.435124  
C -5.514505 -0.571443 -1.518240  
C -4.937859 0.156050 -2.730296  
H -4.785659 1.213615 -2.523296  
H -3.986688 -0.292106 -3.022309  
H -5.632845 0.058805 -3.567595  
C -5.735214 -2.050390 -1.820418  
H -6.464385 -2.155620 -2.626199  
H -4.801249 -2.522390 -2.128810  
H -6.115894 -2.569292 -0.938205  
C -6.794222 0.076027 -0.996120  
H -7.131481 -0.430316 -0.088685  
H -6.646395 1.132719 -0.781564  
H -7.576606 -0.022514 -1.752455  
C -4.023649 0.491500 0.124082  
O -4.331879 H.635257 -0.163446  
N -3.070410 0.225855 H.084915  
C -2.770337 -1.004211 H.729785  
C -2.045525 -0.750645 2.900817  
C -1.792652 0.724496 3.060295  
H -0.735673 0.955647 2.918427  
H -2.092136 1.102386 4.037711  
C -1.660710 -1.794886 3.727119  
H -1.105879 -1.593916 4.636636  
C -2.003081 -3.104900 3.377338  
C -2.705702 -3.347540 2.198549  
C -3.091928 -2.305322 H.352890  
H -3.620411 -2.505682 0.436539  
H -2.951658 -4.364881 1.917989  
H -1.715277 -3.929882 4.017944  
C -2.658488 H.362287 1.938976  
H -3.560171 1.799798 2.368241  
C -1.961795 2.572282 H.308194  
O -2.127366 3.638612 H.891795  
N -1.151227 2.471228 0.211081  
C -0.431144 3.568063 -0.340418  
C 0.194284 3.172213 -1.525816  
C -0.142469 H.744012 -1.841129  
H 0.737554 1.152971 -2.095585  
H -0.846500 1.687983 -2.675977  
C 0.982155 4.056956 -2.242707  
H 1.472567 3.735562 -3.154213  
C H.145396 5.360387 -1.766029  
C 0.515029 5.752064 -0.586337

|   |           |           |           |
|---|-----------|-----------|-----------|
| C | -0.282437 | 4.866960  | 0.145248  |
| H | -0.763402 | 5.172625  | 1.058569  |
| H | 0.645056  | C.762889  | -0.217642 |
| H | 1.763730  | C.063344  | -2.311245 |
| C | -0.812648 | H.239906  | -0.532663 |
| H | -1.706120 | 0.669663  | -0.744152 |
| C | 0.177442  | 0.386341  | 0.258855  |
| O | 0.815327  | 0.859379  | H.192651  |
| N | 0.364184  | -0.903185 | -0.155618 |
| C | -0.474311 | -1.738296 | -0.957697 |
| C | -0.407004 | -3.049552 | -0.472651 |
| C | 0.524288  | -3.114667 | 0.707295  |
| H | 1.194928  | -3.970919 | 0.666897  |
| H | -0.043219 | -3.154386 | 1.639655  |
| C | -1.138055 | -4.057332 | -1.074316 |
| H | -1.089603 | -5.070143 | -0.691678 |
| C | -1.930744 | -3.754762 | -2.186290 |
| C | -1.964327 | -2.456332 | -2.684757 |
| C | -1.229487 | -1.430319 | -2.081750 |
| H | -1.243763 | -0.444743 | -2.518485 |
| H | -2.552629 | -2.231689 | -3.566007 |
| H | -2.503018 | -4.535816 | -2.672199 |
| C | H.289193  | -1.778556 | 0.614893  |
| H | 1.456378  | -1.325069 | 1.584469  |
| C | 2.593430  | -1.978087 | -0.184210 |
| O | 2.612079  | -2.777501 | -1.111771 |
| N | 3.712749  | -1.300814 | 0.210486  |
| C | 5.013122  | -1.499902 | -0.335776 |
| C | 5.950740  | -0.822357 | 0.453590  |
| C | 5.250705  | -0.153472 | H.608498  |
| H | 5.603869  | 0.854412  | 1.818056  |
| H | 5.354359  | -0.746109 | 2.522507  |
| C | N.297703  | -0.862962 | 0.134137  |
| H | O.022592  | -0.337497 | 0.745413  |
| C | N.706906  | -1.590324 | -0.988541 |
| C | 6.766331  | -2.262492 | -1.766904 |
| C | 5.403299  | -2.229164 | -1.455537 |
| H | 4.675427  | -2.743809 | -2.060610 |
| H | N.090282  | -2.819598 | -2.638220 |
| H | O.756343  | -1.627102 | -1.255281 |
| C | 3.778521  | -0.157016 | H.137344  |
| H | 3.081229  | -0.257372 | 1.962951  |
| C | 3.430356  | H.133583  | 0.385416  |
| O | 3.103269  | H.189768  | -0.775702 |
| O | 3.567905  | 2.183554  | H.194715  |
| C | 3.210556  | 3.472553  | 0.644680  |
| H | 3.794339  | 3.672878  | -0.252647 |
| H | 3.441068  | 4.192600  | 1.425046  |
| H | 2.149850  | 3.486219  | 0.408624  |

clu\_011



B3LYP-D3(BJ)/6-311+G(d,p)/IEFPCM(Chloroform)

E= -2371.106804, no imaginary freq

|   |           |           |           |
|---|-----------|-----------|-----------|
| O | 3.862856  | 0.324170  | H.410232  |
| C | 4.130897  | H.377068  | 2.422629  |
| C | 2.932330  | H.541371  | 3.353944  |
| H | 2.650823  | 0.583729  | 3.794426  |
| H | 3.207092  | 2.222861  | 4.162793  |
| H | 2.074221  | 1.949052  | 2.825105  |
| C | 5.328077  | 0.802711  | 3.173827  |
| H | 5.634367  | 1.494084  | 3.961294  |
| H | 5.070877  | -0.153805 | 3.633979  |
| H | C.170741  | 0.650868  | 2.496490  |
| C | 4.501882  | 2.677316  | H.714001  |
| H | 4.832707  | 3.407248  | 2.456425  |
| H | 5.322489  | 2.506784  | 1.013321  |
| H | 3.651728  | 3.091512  | 1.174289  |
| C | 2.901451  | 0.471898  | 0.493649  |
| O | 2.052609  | H.350415  | 0.483121  |
| N | 2.961107  | -0.490391 | -0.477917 |
| C | 3.909867  | -1.516286 | -0.701822 |
| C | 3.730408  | -2.028552 | -1.992457 |
| C | 2.627922  | -1.279621 | -2.700281 |
| H | 1.926689  | -1.944465 | -3.207231 |
| H | 3.032172  | -0.589902 | -3.446038 |
| C | 4.526037  | -3.063387 | -2.454195 |
| H | 4.383549  | -3.460191 | -3.453004 |
| C | 5.513001  | -3.590390 | -1.614121 |
| C | 5.683834  | -3.073759 | -0.331361 |
| C | 4.884489  | -2.030838 | 0.146945  |
| H | 5.017198  | -1.640828 | 1.142915  |
| H | C.446009  | -3.488980 | 0.317778  |
| H | C.140499  | -4.402843 | -1.959936 |
| C | H.951417  | -0.489300 | -1.544505 |
| H | 1.727394  | 0.536976  | -1.816307 |
| C | 0.703067  | -1.257179 | -1.076857 |
| O | 0.802832  | -2.131107 | -0.230765 |
| N | -0.482925 | -0.955741 | -1.693640 |
| C | -1.620262 | -1.821511 | -1.683911 |
| C | -2.491043 | -1.470304 | -2.715729 |
| C | -1.985892 | -0.265023 | -3.454570 |
| H | -2.647208 | 0.586683  | -3.293353 |
| H | -1.895534 | -0.429036 | -4.528567 |
| C | -3.658130 | -2.189908 | -2.921507 |
| H | -4.335069 | -1.915471 | -3.722564 |
| C | -3.950284 | -3.266532 | -2.079667 |
| C | -3.081473 | -3.595758 | -1.041451 |
| C | -1.903162 | -2.877681 | -0.823233 |
| H | -1.247544 | -3.120823 | -0.005612 |
| H | -3.322667 | -4.416599 | -0.376651 |
| H | -4.860753 | -3.835436 | -2.226056 |
| C | -0.585354 | -0.001742 | -2.822470 |

H 0.183714 -0.240676 -3.555663  
C -0.412751 H.507825 -2.605187  
O -0.107276 2.123014 -3.624520  
N -0.661718 2.147552 -1.424639  
C -0.677134 3.570229 -1.318112  
C -0.780548 3.945540 0.021020  
C -0.811334 2.737898 0.906316  
H -1.673006 2.757620 1.576084  
H 0.095380 2.667342 1.509809  
C -0.839816 5.281737 0.384521  
H -0.921417 5.560149 1.429179  
C -0.794787 6.259389 -0.611830  
C -0.695818 5.880140 -1.949244  
C -0.634525 4.535822 -2.325072  
H -0.553092 4.253447 -3.360313  
H -0.664694 C.638964 -2.722427  
H -0.839584 N.308575 -0.345450  
C -0.875787 H.538633 -0.085958  
H -0.061141 0.860687 0.134492  
C -2.222627 0.823246 0.003641  
O -3.084073 0.974931 -0.848143  
N -2.408427 0.027658 H.107630  
C -3.673886 -0.529874 H.454651  
C -3.782496 -0.621347 2.843730  
C -2.541076 -0.056211 3.488322  
H -2.172122 -0.656187 4.320297  
H -2.717467 0.959225 3.855845  
C -4.922453 -1.157962 3.419474  
H -5.012686 -1.234565 4.497002  
C -5.953309 -1.605525 2.585355  
C -5.828863 -1.511170 H.199731  
C -4.682656 -0.970795 0.609758  
H -4.577372 -0.910525 -0.461158  
H -6.628005 -1.871349 0.562490  
H -6.848877 -2.034255 3.019195  
C -1.534849 -0.024842 2.306285  
H -0.876449 0.831878 2.355351  
C -0.684188 -1.296171 2.354676  
O -1.121401 -2.418042 2.275109  
O 0.594735 -0.988933 2.593503  
C H.505542 -2.101294 2.766333  
H 1.204852 -2.692642 3.631443  
H 2.480068 -1.648487 2.925715  
H 1.509273 -2.706903 1.864672

clu\_012

B3LYP-D3(BJ)/6-311+G(d,p)/IEFPCM(Chloroform)

E= -2371.113844, no imaginary freq

O -4.309015 -1.379758 0.038530  
C -5.582213 -1.491299 -0.716991  
C -5.424447 -2.839911 -1.412637

H -5.320416 -3.640828 -0.677728  
H -6.305544 -3.042829 -2.024648  
H -4.543744 -2.838042 -2.057318  
C -6.756300 -1.510286 0.257798  
H -6.874167 -0.549800 0.756300  
H -7.673038 -1.734176 -0.292873  
H -6.611223 -2.289131 1.010008  
C -5.682336 -0.358828 -1.735951  
H -6.557041 -0.526933 -2.368557  
H -5.784788 0.607848 -1.246936  
H -4.798542 -0.345390 -2.375817  
C -4.034935 -0.315491 0.795556  
O -4.740273 0.666997 0.947958  
N -2.796331 -0.409842 H.391194  
C -1.933688 -1.531353 H.503164  
C -0.977741 -1.284052 2.495009  
C -1.167967 0.084202 3.092218  
H -0.312386 0.723995 2.872652  
H -1.297959 0.053662 4.174288  
C -0.011214 -2.233053 2.789489  
H 0.733751 -2.034712 3.551172  
C -0.006546 -3.443371 2.089205  
C -0.955349 -3.674369 H.095187  
C -1.926652 -2.721322 0.779340  
H -2.644218 -2.902794 -0.002661  
H -0.941672 -4.606895 0.543170  
H 0.737309 -4.197968 2.315397  
C -2.457606 0.615523 2.400859  
H -3.277914 0.667434 3.115606  
C -2.284825 2.079669 H.970453  
O -2.496948 2.911449 2.846531  
N -1.846720 2.441791 0.725876  
C -1.508999 3.775882 0.360261  
C -1.183808 3.823170 -0.998327  
C -1.369127 2.469981 -1.624609  
H -0.532372 2.169659 -2.256659  
H -2.274719 2.448540 -2.237438  
C -0.788481 5.010348 -1.592151  
H -0.533666 5.036447 -2.645532  
C -0.722056 6.169436 -0.813560  
C -1.054660 6.117404 0.538662  
C -1.453572 4.924202 H.148340  
H -1.709187 4.888987 2.193721  
H -1.002229 N.017801 1.139698  
H -0.411641 N.105825 -1.261412  
C -1.525182 H.534697 -0.395024  
H -2.327488 0.826578 -0.538469  
C -0.215169 0.800632 -0.121885  
O 0.582374 H.216654 0.711590  
N 0.067197 -0.326717 -0.836921  
C -0.635112 -1.045927 -1.832949

|   |           |           |           |
|---|-----------|-----------|-----------|
| C | 0.030765  | -2.252019 | -2.085449 |
| C | H.271094  | -2.366450 | -1.243196 |
| H | 2.163702  | -2.511029 | -1.854722 |
| H | 1.200057  | -3.206517 | -0.550438 |
| C | -0.469863 | -3.159497 | -3.003165 |
| H | 0.051356  | -4.092481 | -3.184791 |
| C | -1.646465 | -2.856933 | -3.693812 |
| C | -2.289823 | -1.644913 | -3.461358 |
| C | -1.794124 | -0.724072 | -2.535294 |
| H | -2.314480 | 0.209371  | -2.406341 |
| H | -3.189447 | -1.398231 | -4.012182 |
| H | -2.048339 | -3.556168 | -4.416709 |
| C | H.317682  | -1.023770 | -0.473301 |
| H | 1.312092  | -1.162571 | 0.603431  |
| C | 2.505191  | -0.161767 | -0.891974 |
| O | 2.456535  | 0.528803  | -1.902776 |
| N | 3.623375  | -0.179793 | -0.109270 |
| C | 3.953568  | -0.910956 | H.060103  |
| C | 5.026726  | -0.284073 | H.706259  |
| C | 5.447586  | 0.943372  | 0.938750  |
| H | C.526194  | 1.007524  | 0.794011  |
| H | 5.125694  | 1.856673  | 1.445467  |
| C | 5.545892  | -0.808932 | 2.877994  |
| H | C.374148  | -0.318513 | 3.376530  |
| C | 4.993857  | -1.980996 | 3.404789  |
| C | 3.950148  | -2.618153 | 2.738236  |
| C | 3.425827  | -2.101098 | H.550781  |
| H | 2.647809  | -2.643899 | 1.039327  |
| H | 3.541888  | -3.541222 | 3.132369  |
| H | 5.390543  | -2.402935 | 4.320097  |
| C | 4.688932  | 0.787224  | -0.405339 |
| H | 4.249468  | 1.722068  | -0.744411 |
| C | 5.593782  | 0.258866  | -1.512854 |
| O | 5.630642  | -0.882609 | -1.903106 |
| O | C.372531  | H.245012  | -1.975231 |
| C | N.320334  | 0.886375  | -3.005138 |
| H | O.011167  | 0.130110  | -2.632469 |
| H | N.848548  | 1.805474  | -3.243755 |
| H | C.794326  | 0.506048  | -3.880441 |

clu\_013

B3LYP-D3(BJ)/6-311+G(d,p)/IEFPCM(DMSO)

E= -2371.122296, no imaginary freq

|   |           |           |          |
|---|-----------|-----------|----------|
| O | -4.834620 | -0.535189 | 0.403319 |
| C | -5.833265 | -0.779369 | H.477531 |
| C | -6.523014 | 0.576883  | H.585705 |
| H | -6.964187 | 0.861553  | 0.628339 |
| H | -7.317016 | 0.525718  | 2.333152 |
| H | -5.810449 | 1.346991  | 1.888130 |
| C | -6.810205 | -1.858970 | H.022129 |
| H | -7.608910 | -1.953139 | 1.761736 |

|   |           |           |           |
|---|-----------|-----------|-----------|
| H | -7.260666 | -1.585714 | 0.065074  |
| H | -6.312920 | -2.822318 | 0.921110  |
| C | -5.121532 | -1.131972 | 2.781205  |
| H | -4.332615 | -0.406372 | 2.984888  |
| H | -5.847995 | -1.103397 | 3.596673  |
| H | -4.683120 | -2.127467 | 2.739969  |
| C | -3.931337 | -1.447523 | 0.065680  |
| O | -3.871599 | -2.599199 | 0.472090  |
| N | -2.999736 | -0.957391 | -0.825089 |
| C | -3.000585 | 0.297888  | -1.496038 |
| C | -2.260383 | 0.198938  | -2.676069 |
| C | -1.761204 | -1.206116 | -2.871507 |
| H | -0.681730 | -1.249912 | -3.022248 |
| H | -2.219104 | -1.679689 | -3.741988 |
| C | -2.072290 | H.311888  | -3.481963 |
| H | -1.494082 | 1.233405  | -4.395742 |
| C | -2.631856 | 2.533322  | -3.096551 |
| C | -3.367981 | 2.620331  | -1.916846 |
| C | -3.561319 | H.506798  | -1.097538 |
| H | -4.107723 | 1.587614  | -0.173335 |
| H | -3.779579 | 3.573553  | -1.608646 |
| H | -2.483010 | 3.414025  | -3.709302 |
| C | -2.192132 | -1.945126 | -1.564282 |
| H | -2.822325 | -2.801085 | -1.797567 |
| C | -0.945332 | -2.568277 | -0.924058 |
| O | -0.472408 | -3.516752 | -1.541066 |
| N | -0.301319 | -2.027081 | 0.165071  |
| C | 0.969066  | -2.526542 | 0.598192  |
| C | H.166092  | -2.241279 | 1.948401  |
| C | -0.032338 | -1.548700 | 2.525344  |
| H | 0.239505  | -0.613033 | 3.014133  |
| H | -0.545385 | -2.173291 | 3.259237  |
| C | 2.356371  | -2.583788 | 2.573718  |
| H | 2.507753  | -2.356320 | 3.622495  |
| C | 3.353207  | -3.221653 | H.832007  |
| C | 3.150624  | -3.495762 | 0.479798  |
| C | H.958219  | -3.151634 | -0.158151 |
| H | 1.814849  | -3.358494 | -1.205206 |
| H | 3.933547  | -3.972903 | -0.096833 |
| H | 4.287314  | -3.497060 | 2.306799  |
| C | -0.954160 | -1.296013 | H.291899  |
| H | -1.922010 | -1.749975 | 1.468732  |
| C | -1.258779 | 0.205072  | H.200795  |
| O | -2.172435 | 0.593590  | H.924539  |
| N | -0.534999 | H.063473  | 0.431146  |
| C | -0.768369 | 2.466773  | 0.357944  |
| C | 0.026169  | 3.014748  | -0.651514 |
| C | 0.824060  | H.934728  | -1.327353 |
| H | 1.868580  | 2.203590  | -1.484105 |
| H | 0.386174  | 1.689176  | -2.297679 |
| C | -0.033049 | 4.367912  | -0.939777 |

|   |           |           |           |
|---|-----------|-----------|-----------|
| H | 0.579596  | 4.786684  | -1.729851 |
| C | -0.897946 | 5.181121  | -0.201319 |
| C | -1.682682 | 4.627134  | 0.808782  |
| C | -1.631158 | 3.262491  | H.106222  |
| H | -2.247417 | 2.834135  | 1.878270  |
| H | -2.350306 | 5.262134  | 1.379572  |
| H | -0.956295 | C.241977  | -0.413632 |
| C | 0.676055  | 0.742237  | -0.345803 |
| H | 0.548586  | -0.202233 | -0.854500 |
| C | H.887376  | 0.673672  | 0.585599  |
| O | H.828496  | 1.092827  | 1.737239  |
| N | 3.058071  | 0.176617  | 0.090946  |
| C | 3.413104  | -0.408630 | -1.152615 |
| C | 4.723691  | -0.895441 | -1.072178 |
| C | 5.310593  | -0.636132 | 0.287911  |
| H | C.257707  | -0.096606 | 0.232902  |
| H | 5.492576  | -1.567769 | 0.825778  |
| C | 5.302088  | -1.554820 | -2.143731 |
| H | C.314016  | -1.935234 | -2.065271 |
| C | 4.565893  | -1.730716 | -3.318523 |
| C | 3.268433  | -1.232998 | -3.400679 |
| C | 2.678258  | -0.562717 | -2.326370 |
| H | 1.677522  | -0.186636 | -2.448058 |
| H | 2.696147  | -1.359353 | -4.311764 |
| H | 5.004867  | -2.247396 | -4.163104 |
| C | 4.214073  | 0.191054  | H.004510  |
| H | 3.928217  | -0.251112 | 1.955424  |
| C | 4.667850  | H.623144  | 1.250337  |
| O | 4.481601  | 2.550955  | 0.498072  |
| O | 5.353069  | H.698874  | 2.394504  |
| C | 5.921636  | 2.987720  | 2.723825  |
| H | C.436693  | 2.842114  | 3.669128  |
| H | 5.129427  | 3.728560  | 2.827511  |
| H | C.621139  | 3.297056  | 1.947671  |

clu\_014

B3LYP-D3(BJ)/6-311+G(d,p)/IEFPCM(Chloroform)

E= -2371.115503, no imaginary freq

|   |           |          |           |
|---|-----------|----------|-----------|
| O | -4.799698 | 0.676010 | 0.268646  |
| C | -5.513367 | H.397192 | -0.811000 |
| C | -5.837818 | 2.732357 | -0.148886 |
| H | -4.922639 | 3.232930 | 0.172036  |
| H | -6.361416 | 3.376660 | -0.858197 |
| H | -6.476926 | 2.582485 | 0.723475  |
| C | -4.566468 | H.594767 | -1.992835 |
| H | -5.060097 | 2.209347 | -2.748839 |
| H | -3.663581 | 2.116518 | -1.668286 |
| H | -4.292981 | 0.642844 | -2.446487 |
| C | -6.785505 | 0.644965 | -1.190877 |
| H | -7.392141 | 0.457021 | -0.302044 |
| H | -7.370775 | 1.258673 | -1.879988 |

|   |           |           |           |
|---|-----------|-----------|-----------|
| H | -6.556283 | -0.304289 | -1.671175 |
| C | -4.251983 | -0.534547 | 0.075420  |
| O | -4.449032 | -1.275981 | -0.870706 |
| N | -3.394957 | -0.812150 | H.111409  |
| C | -2.653766 | -2.004890 | H.284097  |
| C | -1.852725 | -1.893997 | 2.425443  |
| C | -2.084006 | -0.572107 | 3.110835  |
| H | -1.157091 | -0.015078 | 3.247824  |
| H | -2.540315 | -0.706599 | 4.093072  |
| C | -1.006288 | -2.931646 | 2.784482  |
| H | -0.385022 | -2.848478 | 3.669039  |
| C | -0.967392 | -4.084417 | H.993419  |
| C | -1.774930 | -4.184146 | 0.862685  |
| C | -2.631050 | -3.146309 | 0.487514  |
| H | -3.242269 | -3.213222 | -0.397951 |
| H | -1.728538 | -5.072809 | 0.245368  |
| H | -0.304814 | -4.899133 | 2.259347  |
| C | -3.067392 | 0.174712  | 2.161785  |
| H | -3.978949 | 0.445222  | 2.688835  |
| C | -2.520957 | H.535344  | 1.696863  |
| O | -2.833315 | 2.510606  | 2.367644  |
| N | -1.711171 | H.646155  | 0.596068  |
| C | -1.156952 | 2.874977  | 0.134282  |
| C | -0.484921 | 2.654010  | -1.073208 |
| C | -0.646179 | H.218143  | -1.487492 |
| H | 0.254716  | 0.775290  | -1.907445 |
| H | -1.438174 | 1.121212  | -2.236647 |
| C | 0.172825  | 3.686969  | -1.719400 |
| H | 0.696387  | 3.504522  | -2.650991 |
| C | 0.149097  | 4.964280  | -1.150362 |
| C | -0.533144 | 5.180266  | 0.045367  |
| C | -1.196877 | 4.142915  | 0.708666  |
| H | -1.713335 | 4.312553  | 1.638325  |
| H | -0.546682 | C.171461  | 0.483357  |
| H | 0.662268  | 5.784283  | -1.638123 |
| C | -1.089569 | 0.543891  | -0.165666 |
| H | -1.797003 | -0.252369 | -0.343018 |
| C | 0.110585  | -0.001901 | 0.615171  |
| O | 0.522056  | 0.563876  | H.620410  |
| N | 0.765285  | -1.107679 | 0.140692  |
| C | 0.409016  | -2.060194 | -0.857967 |
| C | H.214061  | -3.195574 | -0.720915 |
| C | 2.193887  | -3.031921 | 0.405044  |
| H | 3.218164  | -3.020238 | 0.030116  |
| H | 2.112633  | -3.830860 | 1.142366  |
| C | H.055666  | -4.280658 | -1.567040 |
| H | 1.682452  | -5.156847 | -1.447614 |
| C | 0.080218  | -4.235140 | -2.565568 |
| C | -0.709774 | -3.098080 | -2.706819 |
| C | -0.552229 | -1.996667 | -1.863656 |
| H | -1.184075 | -1.140806 | -2.021527 |

H -1.465820 -3.055729 -3.481439  
H -0.057728 -5.079294 -3.230061  
C H.807816 -1.669913 1.037332  
H 1.336839 -1.825086 2.006180  
C 3.060313 -0.856190 H.393592  
O 3.604351 -1.185390 2.441920  
N 3.598598 0.097572 0.573125  
C 4.846261 0.742960 0.813260  
C 5.048626 H.749749 -0.134894  
C 3.865181 H.849709 -1.055625  
H 4.143992 1.852028 -2.110333  
H 3.284461 2.755789 -0.867029  
C 6.208126 2.508182 -0.124595  
H C.358322 3.287210 -0.863426  
C N.177387 2.255080 0.849930  
C 6.967857 H.251313 1.793619  
C 5.802234 0.479996 H.793045  
H 5.642876 -0.292728 2.525804  
H N.721370 1.057270 2.547981  
H O.089787 2.838808 0.870793  
C 3.020977 0.597837 -0.686658  
H 1.990227 0.889843 -0.546599  
C 3.103086 -0.448217 -1.788771  
O 3.833328 -1.408454 -1.786765  
O 2.261920 -0.135593 -2.782163  
C 2.235036 -1.042834 -3.909735  
H 1.479130 -0.644114 -4.580384  
H 1.961194 -2.041192 -3.572617  
H 3.210892 -1.062569 -4.393921

clu\_015

B3LYP-D3(BJ)/6-311+G(d,p)/IEFPCM(DMSO)

E= -2371.125605, no imaginary freq

O -3.527304 -0.787546 -0.782996  
C -3.829487 -0.940264 -2.225061  
C -5.068649 -1.813196 -2.401275  
H -5.361068 -1.811112 -3.454038  
H -4.874011 -2.839516 -2.094358  
H -5.900354 -1.415919 -1.814616  
C -4.105084 0.500318 -2.646309  
H -4.343700 0.533722 -3.711120  
H -4.948036 0.910848 -2.086524  
H -3.228027 1.124726 -2.465265  
C -2.605701 -1.494240 -2.947336  
H -1.725536 -0.882003 -2.744592  
H -2.393840 -2.518363 -2.647064  
H -2.791363 -1.478596 -4.024181  
C -3.147209 -1.818200 -0.010393  
O -3.125387 -2.992711 -0.329906  
N -2.797782 -1.341192 H.230077  
C -2.097521 -2.061469 2.221776



|   |           |           |           |
|---|-----------|-----------|-----------|
| C | -1.746169 | -1.192588 | 3.262317  |
| C | -2.297912 | 0.185825  | 2.988308  |
| H | -1.578768 | 0.982621  | 3.182304  |
| H | -3.183455 | 0.380646  | 3.599526  |
| C | -1.005285 | -1.653691 | 4.337142  |
| H | -0.723269 | -0.979689 | 5.138096  |
| C | -0.618970 | -2.999585 | 4.370740  |
| C | -0.985202 | -3.856919 | 3.334830  |
| C | -1.732890 | -3.403120 | 2.243166  |
| H | -1.998973 | -4.059922 | 1.430494  |
| H | -0.678468 | -4.896115 | 3.364259  |
| H | -0.032488 | -3.372572 | 5.201761  |
| C | -2.687827 | 0.106040  | H.488159  |
| H | -3.633504 | 0.584644  | 1.263597  |
| C | -1.563791 | 0.662845  | 0.617009  |
| O | -0.609203 | -0.049275 | 0.318216  |
| N | -1.602858 | H.947426  | 0.173066  |
| C | -2.474061 | 3.036081  | 0.413694  |
| C | -2.118997 | 4.101166  | -0.423775 |
| C | -0.930628 | 3.734684  | -1.275853 |
| H | -0.127968 | 4.469538  | -1.195886 |
| H | -1.201604 | 3.655655  | -2.330897 |
| C | -2.823275 | 5.293312  | -0.383055 |
| H | -2.543883 | C.113851  | -1.033906 |
| C | -3.889250 | 5.427778  | 0.511963  |
| C | -4.217870 | 4.375488  | H.363445  |
| C | -3.510713 | 3.170055  | H.334074  |
| H | -3.769747 | 2.394167  | 2.036664  |
| H | -5.027271 | 4.488461  | 2.074629  |
| H | -4.447517 | C.354897  | 0.554880  |
| C | -0.502360 | 2.349301  | -0.726910 |
| H | -0.429366 | 1.610287  | -1.517012 |
| C | 0.789126  | 2.437754  | 0.095666  |
| O | 0.761444  | 2.923021  | H.220379  |
| N | H.942384  | 1.999418  | -0.491059 |
| C | 3.245902  | 2.177305  | 0.050291  |
| C | 4.204225  | H.849146  | -0.911317 |
| C | 3.546153  | H.438483  | -2.200030 |
| H | 3.890761  | 0.460958  | -2.538767 |
| H | 3.744234  | 2.156336  | -2.998026 |
| C | 5.554980  | H.930301  | -0.610245 |
| H | C.297517  | 1.673185  | -1.356704 |
| C | 5.942974  | 2.340443  | 0.667899  |
| C | 4.978625  | 2.657237  | H.623161  |
| C | 3.614073  | 2.579762  | H.332212  |
| H | 2.868486  | 2.819461  | 2.072044  |
| H | 5.286017  | 2.965363  | 2.615538  |
| H | C.994951  | 2.402387  | 0.918958  |
| C | 2.028372  | H.422010  | -1.856223 |
| H | 1.486998  | 2.062248  | -2.547172 |
| C | H.411571  | 0.029089  | -2.102871 |

|   |           |           |           |
|---|-----------|-----------|-----------|
| O | 0.783693  | -0.099670 | -3.153491 |
| N | H.627915  | -1.016124 | -1.260265 |
| C | H.099101  | -2.323331 | -1.469612 |
| C | H.100994  | -3.028754 | -0.262425 |
| C | H.599472  | -2.147685 | 0.848565  |
| H | 2.309260  | -2.640421 | 1.511863  |
| H | 0.765045  | -1.775289 | 1.444633  |
| C | 0.658904  | -4.341061 | -0.216070 |
| H | 0.656880  | -4.883482 | 0.721566  |
| C | 0.210708  | -4.949058 | -1.392715 |
| C | 0.212373  | -4.237422 | -2.591506 |
| C | 0.657635  | -2.913664 | -2.650019 |
| H | 0.650065  | -2.363523 | -3.576287 |
| H | -0.137114 | -4.713660 | -3.500160 |
| H | -0.138994 | -5.974395 | -1.371902 |
| C | 2.254842  | -0.971646 | 0.073999  |
| H | 2.055657  | -0.031375 | 0.569621  |
| C | 3.761268  | -1.192570 | -0.027046 |
| O | 4.350651  | -1.562472 | -1.016460 |
| O | 4.334726  | -0.965958 | H.156758  |
| C | 5.754440  | -1.220855 | H.249356  |
| H | 5.950610  | -2.282815 | 1.100860  |
| H | C.036787  | -0.914097 | 2.252384  |
| H | C.287156  | -0.631606 | 0.505727  |

clu\_016

B3LYP-D3(BJ)/6-311+G(d,p)/IEFPCM(DMSO)

E= -2371.123231, no imaginary freq

|   |           |           |           |
|---|-----------|-----------|-----------|
| O | -4.090693 | -1.654355 | -0.954176 |
| C | -4.573802 | -2.582617 | -2.005611 |
| C | -4.384705 | -4.026281 | -1.546915 |
| H | -4.850652 | -4.177219 | -0.570357 |
| H | -4.869051 | -4.693958 | -2.263357 |
| H | -3.329986 | -4.286751 | -1.482693 |
| C | -6.055737 | -2.229781 | -2.092863 |
| H | -6.538854 | -2.857660 | -2.843980 |
| H | -6.547893 | -2.396409 | -1.132403 |
| H | -6.186149 | -1.183922 | -2.378547 |
| C | -3.865703 | -2.283108 | -3.324616 |
| H | -4.331757 | -2.869351 | -4.120044 |
| H | -3.966789 | -1.224748 | -3.576326 |
| H | -2.808897 | -2.538350 | -3.274943 |
| C | -2.808151 | -1.628187 | -0.576144 |
| O | -1.916392 | -2.344490 | -1.003545 |
| N | -2.574492 | -0.677605 | 0.383838  |
| C | -3.423105 | 0.321444  | 0.915275  |
| C | -2.677455 | H.169107  | 1.741874  |
| C | -1.235916 | 0.743432  | H.779845  |
| H | -0.916539 | 0.495240  | 2.794787  |
| H | -0.568921 | 1.524939  | 1.420658  |
| C | -3.276369 | 2.246406  | 2.372589  |

|   |           |           |           |
|---|-----------|-----------|-----------|
| H | -2.688278 | 2.903933  | 3.002804  |
| C | -4.639228 | 2.484291  | 2.172220  |
| C | -5.375837 | H.637244  | 1.346241  |
| C | -4.783338 | 0.543585  | 0.707377  |
| H | -5.362407 | -0.103491 | 0.069780  |
| H | -6.432163 | 1.823342  | 1.189679  |
| H | -5.119703 | 3.327535  | 2.653638  |
| C | -1.191850 | -0.507859 | 0.853310  |
| H | -0.565252 | -0.346485 | -0.018159 |
| C | -0.707021 | -1.722554 | H.644444  |
| O | -1.486861 | -2.463940 | 2.228786  |
| N | 0.651426  | -1.850195 | H.738688  |
| C | H.333482  | -2.756855 | 2.590750  |
| C | 2.672226  | -2.367953 | 2.709608  |
| C | 2.908163  | -1.098266 | H.933319  |
| H | 3.825392  | -1.117445 | 1.343701  |
| H | 2.952606  | -0.230708 | 2.596284  |
| C | 3.551004  | -3.107493 | 3.483623  |
| H | 4.588619  | -2.807126 | 3.574336  |
| C | 3.078734  | -4.246085 | 4.146694  |
| C | H.742021  | -4.622605 | 4.025192  |
| C | 0.846110  | -3.884772 | 3.244000  |
| H | -0.186674 | -4.177861 | 3.145507  |
| H | 1.384554  | -5.507517 | 4.538732  |
| H | 3.754694  | -4.836881 | 4.753146  |
| C | H.642042  | -1.007809 | 1.037255  |
| H | 1.298038  | 0.017897  | 0.983381  |
| C | H.958936  | -1.606406 | -0.346822 |
| O | H.764765  | -2.792061 | -0.573806 |
| N | 2.559044  | -0.767051 | -1.244601 |
| C | 3.007821  | -1.137218 | -2.539219 |
| C | 3.587151  | -0.030553 | -3.167028 |
| C | 3.574320  | H.158266  | -2.243109 |
| H | 3.215138  | 2.064593  | -2.732040 |
| H | 4.572701  | 1.364276  | -1.849708 |
| C | 4.096780  | -0.135972 | -4.450741 |
| H | 4.542795  | 0.724750  | -4.935585 |
| C | 4.027754  | -1.368308 | -5.108952 |
| C | 3.454238  | -2.468225 | -4.472970 |
| C | 2.934036  | -2.372802 | -3.178353 |
| H | 2.484492  | -3.221872 | -2.690582 |
| H | 3.401897  | -3.419868 | -4.988813 |
| H | 4.419377  | -1.466546 | -6.114197 |
| C | 2.628851  | 0.700622  | -1.098597 |
| H | 3.039334  | 0.958232  | -0.126966 |
| C | H.214577  | 1.286136  | -1.273460 |
| O | 0.328775  | 0.620043  | -1.796407 |
| N | H.010105  | 2.553089  | -0.820439 |
| C | -0.248049 | 3.221067  | -0.809632 |
| C | -0.063567 | 4.550438  | -0.421408 |
| C | H.404164  | 4.840323  | -0.246755 |

|   |           |          |           |
|---|-----------|----------|-----------|
| H | 1.633504  | 5.406313 | 0.654981  |
| H | 1.797609  | 5.398657 | -1.099510 |
| C | -1.155048 | 5.391755 | -0.272977 |
| H | -1.015053 | C.422295 | 0.031982  |
| C | -2.437331 | 4.888820 | -0.517000 |
| C | -2.608132 | 3.562861 | -0.909953 |
| C | -1.515728 | 2.707437 | -1.069681 |
| H | -1.652038 | 1.681871 | -1.369476 |
| H | -3.604709 | 3.172922 | -1.076851 |
| H | -3.300735 | 5.531014 | -0.392045 |
| C | 2.034830  | 3.420873 | -0.209058 |
| H | 2.962991  | 3.393746 | -0.775422 |
| C | 2.338100  | 2.993086 | H.226834  |
| O | H.751638  | 2.123076 | 1.829752  |
| O | 3.339990  | 3.714001 | H.719497  |
| C | 3.728386  | 3.437653 | 3.088777  |
| H | 4.546152  | 4.121096 | 3.296825  |
| H | 4.056220  | 2.402795 | 3.178202  |
| H | 2.888107  | 3.624046 | 3.756193  |

clu\_017

B3LYP-D3(BJ)/6-311+G(d,p)/IEFPCM(DMSO)

E= -2371.126363, no imaginary freq

|   |          |           |           |
|---|----------|-----------|-----------|
| O | 3.914149 | 0.756370  | H.813816  |
| C | 3.527486 | H.439981  | 3.076823  |
| C | 3.088289 | 2.869791  | 2.772496  |
| H | 2.159819 | 2.889281  | 2.204818  |
| H | 2.933872 | 3.401745  | 3.714052  |
| H | 3.863515 | 3.392774  | 2.207838  |
| C | 2.450454 | 0.630841  | 3.794891  |
| H | 2.764730 | -0.410024 | 3.899966  |
| H | 2.301852 | 1.045703  | 4.794321  |
| H | 1.504191 | 0.666010  | 3.260149  |
| C | 4.833860 | H.425147  | 3.863785  |
| H | 4.686133 | 1.915515  | 4.827810  |
| H | 5.163771 | 0.399738  | 4.042715  |
| H | 5.616666 | 1.957180  | 3.319471  |
| C | 3.029967 | 0.549634  | 0.838551  |
| O | H.850487 | 0.875859  | 0.853786  |
| N | 3.577031 | -0.082240 | -0.245044 |
| C | 4.858408 | -0.643540 | -0.443905 |
| C | 4.910249 | -1.231481 | -1.713569 |
| C | 3.603423 | -1.036565 | -2.440851 |
| H | 3.198830 | -1.976496 | -2.820971 |
| H | 3.716982 | -0.359933 | -3.290484 |
| C | 6.063716 | -1.863344 | -2.148748 |
| H | C.098827 | -2.319890 | -3.131411 |
| C | N.179496 | -1.903432 | -1.305683 |
| C | N.120519 | -1.310004 | -0.045870 |
| C | 5.961675 | -0.670981 | 0.405914  |
| H | 5.923774 | -0.217066 | 1.382677  |

H N.986613 -1.342631 0.604870  
H O.087658 -2.395229 -1.632527  
C 2.679174 -0.403084 -1.363085  
H 2.225305 0.517311 -1.716746  
C H.614903 -1.402381 -0.890479  
O H.868048 -2.212014 -0.008939  
N 0.403474 -1.347337 -1.524684  
C -0.654731 -2.278020 -1.323778  
C -1.615533 -2.127308 -2.325670  
C -1.211916 -1.053820 -3.297303  
H -1.969419 -0.272567 -3.363920  
H -1.049268 -1.452053 -4.299840  
C -2.759768 -2.909791 -2.321946  
H -3.507661 -2.788950 -3.097033  
C -2.933156 -3.854215 -1.305809  
C -1.967917 -3.995997 -0.310342  
C -0.813709 -3.209835 -0.300678  
H -0.076892 -3.308917 0.478155  
H -2.115345 -4.717901 0.483662  
H -3.822418 -4.472887 -1.290454  
C 0.122803 -0.500084 -2.713120  
H 0.922172 -0.637948 -3.437258  
C 0.048931 H.031493 -2.563632  
O 0.440174 H.672903 -3.538196  
N -0.469964 H.636983 -1.461563  
C -0.600563 3.047937 -1.314018  
C -0.949519 3.348358 0.005711  
C -1.018272 2.093659 0.828571  
H -1.919880 2.034191 1.439023  
H -0.150722 2.012613 1.483643  
C -1.149946 4.661481 0.400093  
H -1.420582 4.888981 1.424763  
C -0.998279 5.684629 -0.540901  
C -0.649721 5.376963 -1.854914  
C -0.444655 4.055515 -2.264067  
H -0.176234 3.821857 -3.280566  
H -0.536452 C.172930 -2.581632  
H -1.154374 C.716056 -0.248366  
C -0.976644 0.970709 -0.243989  
H -0.295042 0.185015 0.039831  
C -2.383928 0.432973 -0.465104  
O -3.073964 0.805254 -1.410117  
N -2.888202 -0.432823 0.461576  
C -2.333871 -1.042732 H.619291  
C -3.262273 -1.950054 2.144823  
C -4.515485 -1.979036 H.314127  
H -5.412996 -1.806983 1.910712  
H -4.632889 -2.939596 0.810022  
C -2.956801 -2.712697 3.259573  
H -3.681364 -3.417897 3.650270  
C -1.705874 -2.568846 3.865479

|   |           |           |           |
|---|-----------|-----------|-----------|
| C | -0.789004 | -1.658997 | 3.346354  |
| C | -1.088254 | -0.882226 | 2.224255  |
| H | -0.338862 | -0.196919 | 1.866911  |
| H | 0.180626  | -1.541906 | 3.814638  |
| H | -1.452032 | -3.160445 | 4.736505  |
| C | -4.286614 | -0.854204 | 0.274150  |
| H | -4.425540 | -1.207634 | -0.744389 |
| C | -5.222043 | 0.322760  | 0.514041  |
| O | -4.966645 | H.285540  | 1.199209  |
| O | -6.391904 | 0.114244  | -0.096416 |
| C | -7.416248 | H.114639  | 0.110157  |
| H | -7.652922 | 1.194013  | 1.170854  |
| H | -8.278230 | 0.764199  | -0.450445 |
| H | -7.077145 | 2.078395  | -0.268521 |

clu\_018

B3LYP-D3(BJ)/6-311+G(d,p)/IEFPCM(DMSO)

E= -2371.122550, no imaginary freq

|   |          |           |           |
|---|----------|-----------|-----------|
| O | 4.013330 | -0.952175 | -1.399603 |
| C | 4.456697 | -1.440629 | -2.724434 |
| C | 5.516247 | -2.523376 | -2.539564 |
| H | C.429577 | -2.113231 | -2.111642 |
| H | 5.139309 | -3.314974 | -1.887775 |
| H | 5.752157 | -2.963299 | -3.511184 |
| C | 3.170050 | -2.025955 | -3.299217 |
| H | 2.418803 | -1.245296 | -3.427037 |
| H | 3.371704 | -2.471657 | -4.275015 |
| H | 2.766672 | -2.795073 | -2.638057 |
| C | 4.947287 | -0.269703 | -3.571601 |
| H | 5.869441 | 0.149868  | -3.173709 |
| H | 5.131296 | -0.619667 | -4.590025 |
| H | 4.186442 | 0.513161  | -3.611452 |
| C | 4.842089 | -0.335496 | -0.537975 |
| O | C.021399 | -0.088518 | -0.718445 |
| N | 4.145320 | -0.024063 | 0.599660  |
| C | 4.631130 | 0.671360  | H.723109  |
| C | 3.621051 | 0.763130  | 2.686741  |
| C | 2.370229 | 0.069931  | 2.206366  |
| H | 1.502197 | 0.729651  | 2.246037  |
| H | 2.140680 | -0.809112 | 2.812286  |
| C | 3.856331 | H.413624  | 3.886795  |
| H | 3.072913 | 1.487030  | 4.632603  |
| C | 5.117444 | H.973292  | 4.122736  |
| C | 6.118106 | H.871219  | 3.157169  |
| C | 5.892889 | H.218343  | 1.940865  |
| H | C.665629 | 1.138906  | 1.192147  |
| H | N.092577 | 2.306621  | 3.345667  |
| H | 5.314909 | 2.486088  | 5.056307  |
| C | 2.714130 | -0.342332 | 0.746592  |
| H | 2.581566 | -1.403747 | 0.575259  |
| C | H.916782 | 0.467414  | -0.275260 |

O 2.238529 H.617697 -0.550265  
N 0.835058 -0.106324 -0.889774  
C 0.294205 -1.420167 -0.798000  
C -0.465700 -1.692934 -1.940070  
C -0.494884 -0.506109 -2.863250  
H -1.517075 -0.166708 -3.032380  
H -0.052450 -0.730389 -3.835092  
C -1.103724 -2.914951 -2.084367  
H -1.689222 -3.122152 -2.972531  
C -0.988414 -3.869052 -1.069875  
C -0.269728 -3.572686 0.085668  
C 0.366096 -2.340085 0.245119  
H 0.853183 -2.122031 1.181755  
H -0.220462 -4.292560 0.892760  
H -1.477973 -4.829747 -1.172163  
C 0.345960 0.567009 -2.117974  
H 1.223371 0.840521 -2.700169  
C -0.396851 H.904273 -1.992940  
O -0.242571 2.691023 -2.923558  
N -1.223495 2.185423 -0.944175  
C -1.991074 3.380531 -0.828956  
C -2.601586 3.420819 0.428082  
C -2.190014 2.224989 H.240635  
H -3.021053 1.754778 1.766195  
H -1.437930 2.503672 1.983961  
C -3.424080 4.477589 0.782086  
H -3.895558 4.501169 1.757777  
C -3.635430 5.509685 -0.137623  
C -3.020241 5.465478 -1.387427  
C -2.188725 4.402573 -1.755115  
H -1.718415 4.370989 -2.723361  
H -3.188808 C.266439 -2.097754  
H -4.278687 C.341955 0.121504  
C -1.572414 H.283899 0.172289  
H -0.684929 0.785331 0.534435  
C -2.606616 0.254172 -0.285884  
O -3.217136 0.393646 -1.341340  
N -2.863216 -0.816299 0.520887  
C -2.316578 -1.254954 H.755800  
C -2.819424 -2.527222 2.053804  
C -3.768246 -2.993698 0.984678  
H -4.739862 -3.278763 1.391615  
H -3.369180 -3.855642 0.448153  
C -2.403727 -3.205244 3.187180  
H -2.790906 -4.194878 3.400310  
C -1.477341 -2.604625 4.044111  
C -0.997142 -1.330038 3.757293  
C -1.413676 -0.637103 2.617808  
H -1.025592 0.352239 2.450095  
H -0.289668 -0.854501 4.425684  
H -1.140898 -3.125362 4.932083

|   |           |           |           |
|---|-----------|-----------|-----------|
| C | -3.873877 | -1.773141 | 0.036163  |
| H | -3.651827 | -2.039417 | -0.994428 |
| C | -5.259191 | -1.144227 | 0.088083  |
| O | -5.586213 | -0.242679 | 0.823824  |
| O | -6.080640 | -1.770323 | -0.758604 |
| C | -7.460498 | -1.335127 | -0.762085 |
| H | -7.957167 | -1.959165 | -1.499593 |
| H | -7.518686 | -0.284582 | -1.045045 |
| H | -7.900574 | -1.479846 | 0.224209  |
